# Supplementary material for: Computational studies on the Rh-catalyzed carboxylation of a C(sp2)–H bond using CO2
Source: Royal Society of Chemistry journal article supplement (doi:10.1039/c7cy01163f), 2017-01-01
Supplement: c7cy01163f1.pdf [file c7cy01163f1.pdf]

## Electronic Supplementary Information

### Computational studies of Rh-catalyzed carboxylation of the C(sp<sup>2</sup>)-H bond using CO<sub>2</sub>

Xiangying Lv<sup>a</sup>, Linhui Zhang<sup>a</sup>, Beibei Sun<sup>a</sup>, Zhizhi Li<sup>a</sup>, Yan-Bo Wu<sup>b</sup> and Gang Lu<sup>\*,c</sup>

<sup>a</sup> Key Laboratory for Yellow River and Huai River Water Environment and Pollution Control, Ministry of Education, Henan Key Laboratory for Environmental Pollution Control, School of Environment, Henan Normal University, Xinxiang, Henan 453007, P. R. China

<sup>b</sup> Key Lab for Materials of Energy Conversion and Storage of Shanxi Province and Key Lab of Chemical Biology and Molecular Engineering of Ministry of Education, Institute of Molecular Science, Shanxi University, Taiyuan, Shanxi, 030006, P. R. China

<sup>c</sup> Department of Chemistry, University of Pittsburgh, Pittsburgh, PA, USA

Correspondence to: [gal40@pitt.edu](mailto:gal40@pitt.edu)

#### Table of Contents

|                                                                           |    |
|---------------------------------------------------------------------------|----|
| Dissociation of chlor-bridged dimeric Rh(I) complex.....                  | S2 |
| Energy profile of the formation of methylrhodium(I).....                  | S3 |
| Disfavored transition state <b>21-TS</b> .....                            | S4 |
| CO <sub>2</sub> insertion into the Rh(III)-C(sp <sup>2</sup> ) bond ..... | S5 |
| Disfavored transition states <b>22-TSa</b> and <b>27-TSa</b> .....        | S6 |
| Topological analysis of the C-H...Rh interaction in <b>22-TS</b> .....    | S7 |
| Cartesian coordinates (Å) and energies of the optimized structures .....  | S9 |

### Dissociation of chlor-bridged dimeric Rh(I) complex

The dimeric Rh(I) complex (**Rh–Cl dimer**) is indeed more stable than the reactant complex **6** in term of free energy (Fig. S1). However, **Rh–Cl dimer** is a species that lies off the catalytic cycle. In contrast, the monomeric **6** with the reactant coordination is reactive species at the outset of the reaction. Moreover, in term of enthalpic energy, the monomeric **6** is more favorable than **Rh–Cl dimer**. The large excess of the reactant **2** can facilitate the dissociation of the dimer species to form the reactive reactant complex **6**. Thus, we only considered the monomeric Rh(I) species involved in the reaction (Fig. 1 in the manuscript).

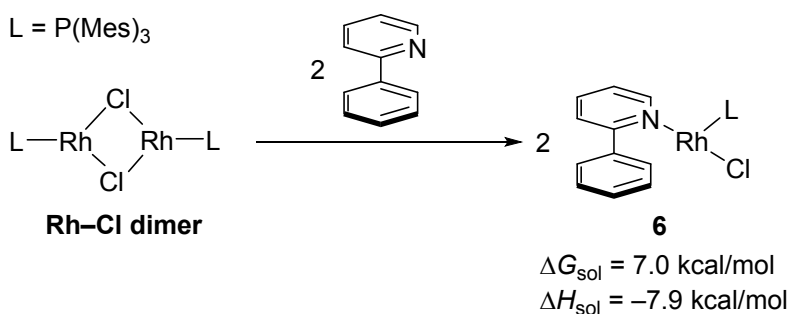

**Fig. S1** Generation of monomeric reactant complex **6** from the chlor-bridged dimeric Rh(I) complex.

### Energy profile of the formation of methylrhodium(I)

The formation of Rh(I)–Me from Rh(I)–Cl and AlMe<sub>2</sub>(OMe) occurs via the four-membered  $\sigma$ -bond metathesis transition state (**TS1**) (Fig. S2). This process has a low barrier of 12.9 kcal/mol. Note that, PCy<sub>3</sub> instead of P(Mes)<sub>3</sub> is used as the ligand because of the failure in calculating the transition state with P(Mes)<sub>3</sub> ligand.

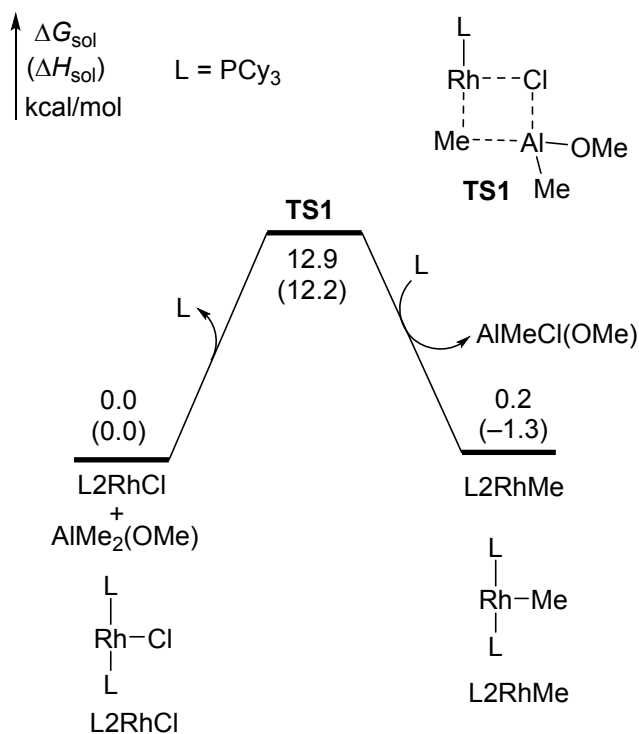

**Fig. S2** Energy profiles of the formation of methylrhodium(I) by the reaction of Rh(I)–Cl with AlMe<sub>2</sub>(OMe).

### Disfavored transition state 21-TS

As shown in Fig. S3, the high barrier of **21-TS** is majorly caused by the steric repulsions between the ortho-methyl group of the P(Mes)<sub>3</sub> ligand and the aryl group (short H···H distance, 2.18 Å), and between the ortho-methyl group of the P(Mes)<sub>2</sub> ligand and CO<sub>2</sub> (short H···O distance, 1.96 Å).

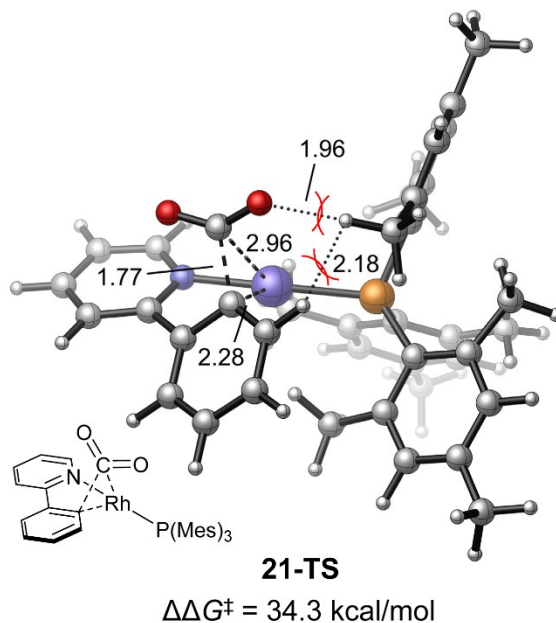

**Fig. S3** Optimized geometries of the disfavored transition state **21-TS**.

### CO<sub>2</sub> insertion into the Rh(III)–C(sp<sup>2</sup>) bond

We calculated the CO<sub>2</sub> insertion into the Rh(III)–C(aryl) bond with and without Me<sub>2</sub>Al(OMe) using the P(Mes)<sub>3</sub> ligand. As shown in Fig. S4, the transition states of CO<sub>2</sub> insertion into the Rh(III)–C(aryl) bond (**30-TS–33-TS**, 32.6–47.6 kcal/mol) have higher barriers than those of the CO<sub>2</sub> insertion into the Rh(I)–C(aryl) bond (**20-TS**, 28.9 kcal/mol and **22-TS**, 22.7 kcal/mol in Fig. 3 in the manuscript). The high barriers are probably due to the steric congestion around the six-coordinated Rh(III) in the transition states of **30-TS–33-TS**. It is also noted that the CO<sub>2</sub> insertion into the Rh(III)–C(aryl) bond is significantly less favorable than the reductive elimination from **10** and **11** to form the Rh(I) metallocycle (**14** in Fig. 2 in the manuscript). Therefore, the carboxylation is less possible to occur at the Rh(III) center.

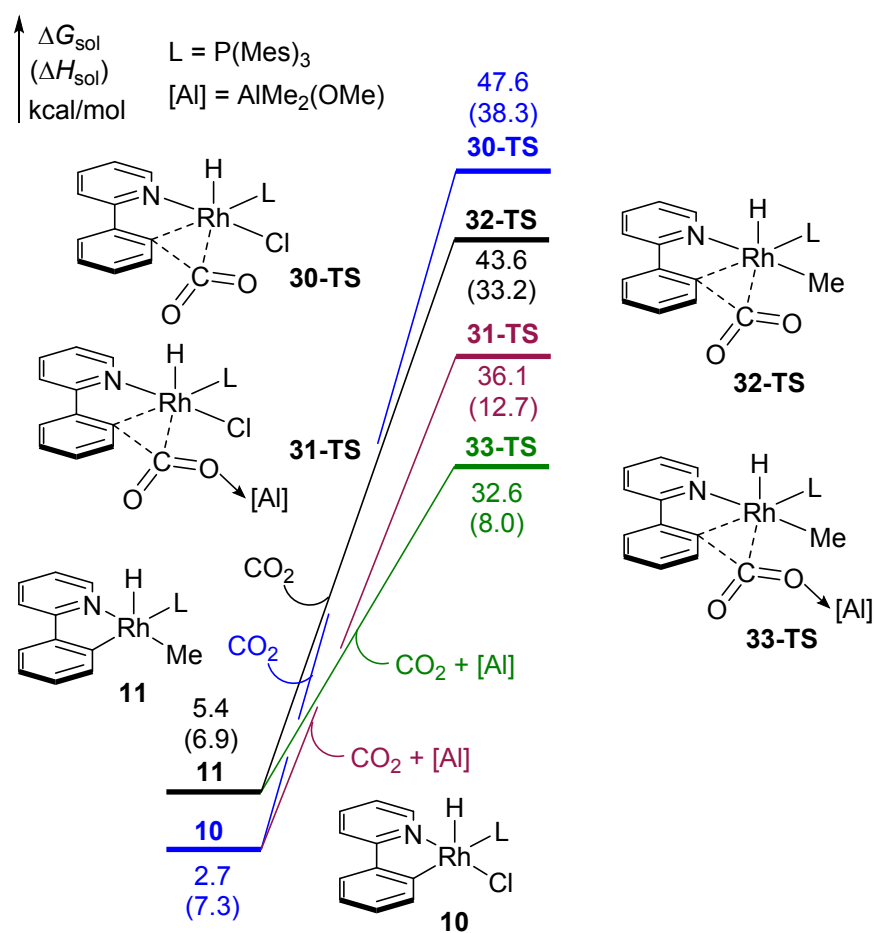

**Fig. S4** Energy profile of CO<sub>2</sub> insertion into the Rh(III)–C(sp<sup>2</sup>) bond.

### Disfavored transition states **22-TSa** and **27-TSa**

As discussed in the manuscript, in the favored **22-TS** and **27-TS** (Fig. 5), the phosphine ligands are *cis* and *trans* to the aryl group, respectively. In contrast, the disfavored **22-TSa** and **27-TSa** hold the ligand geometry *trans* and *cis* to the aryl group (Fig. S5), respectively. The origin of the high barrier of **22-TSa** is due to the steric repulsion between the ortho-methyl group of the P(Mes)<sub>3</sub> ligand and the aryl group in the substrate (short H···H distance, 2.07 Å). The disfavored **27-TSa** is majorly caused by the destabilizing *trans* effect between the ligand and the aryl group.

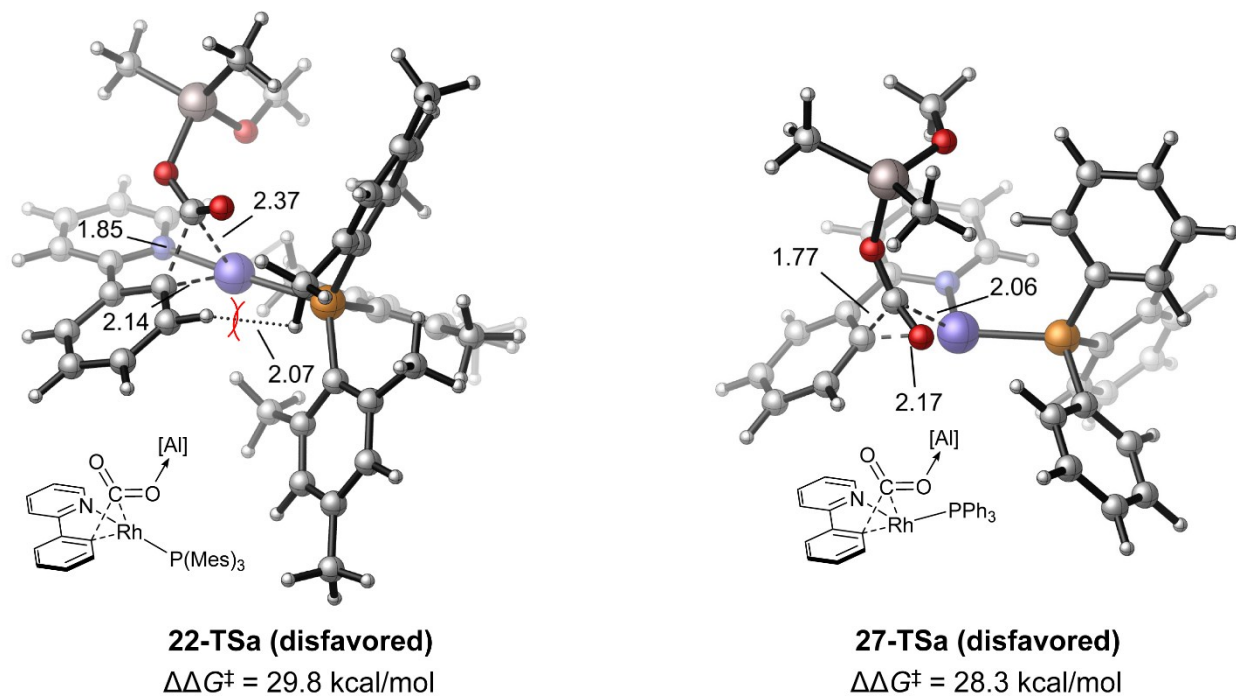

**Fig. S5** Optimized geometries of the disfavored conformers of the transition states **22-TS** and **27-TS**.

### Topological analysis of the C–H...Rh interaction in **22-TS**

The QTAIM analysis was performed to give a better understanding of the agostic interaction between the Rh center and the C–H bond. In the geometry of **22-TS** shown in Fig. S6, the C–H bond proximal to Rh is indeed elongated to 1.12 Å. We then performed topological analysis of **22-TS** implemented in the Multiwfn program. The bond critical point (BCP, shown in green) between the Rh and the H atoms was found. The values of the electron density and the laplacian at this BCP are 0.044 and 0.16 a.u., respectively. Both are in the ranges of the electron density (0.01–0.13 a.u.) and the laplacian (0.03–0.25 a.u.) of a series of reported agostic interactions. This indicates the interaction between the Rh and the C–H bond in **22-TS** is a typical agostic interaction.

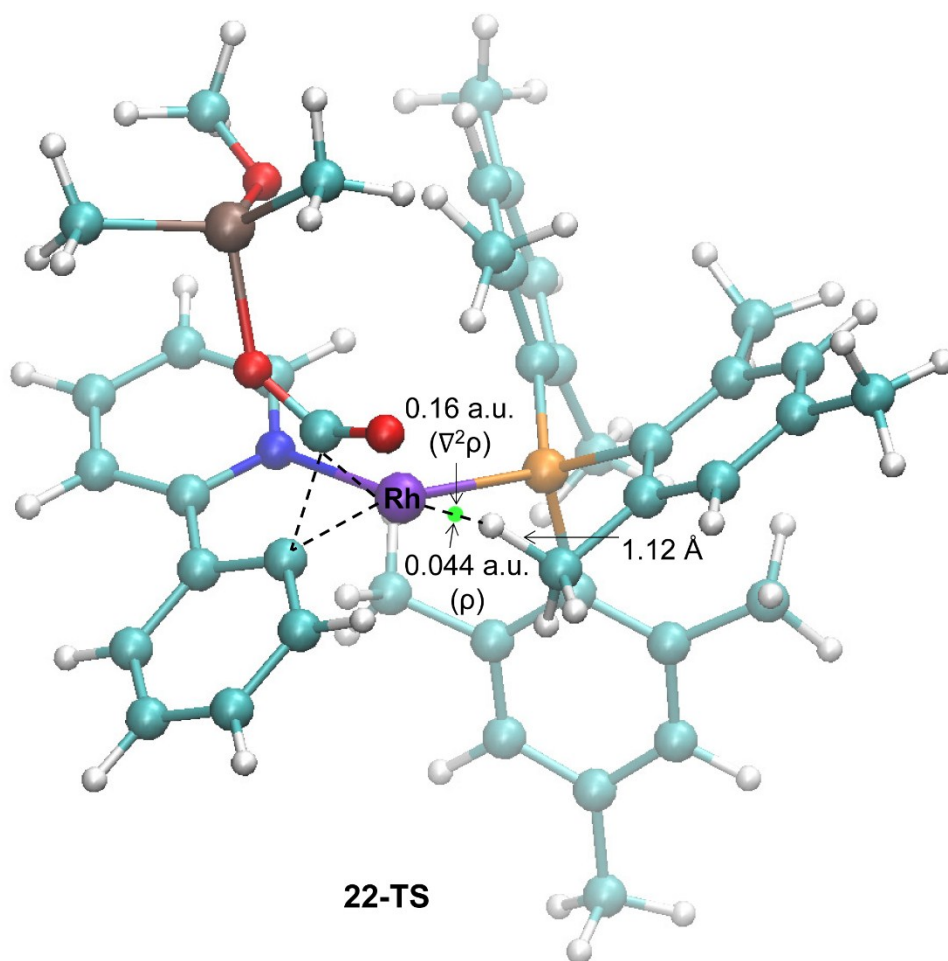

**Fig. S6** Topological analysis of the C–H...Rh interaction in **22-TS**.

To investigate whether the agostic interaction of C–H with Rh can stabilize the CO<sub>2</sub> insertion transition state, we simply replace the methyl substituent in **22-TS** with the H atom in **22-TSb** (Fig. S7), and compare the barriers of these two transition states. The result shows that **22-TSb** without the agostic interaction is 4.7 kcal/mol higher than **22-TS**. This indicates the agnostic C–H···Rh interaction in **22-TS** is a stabilizing factor that can enhance the reactivity.

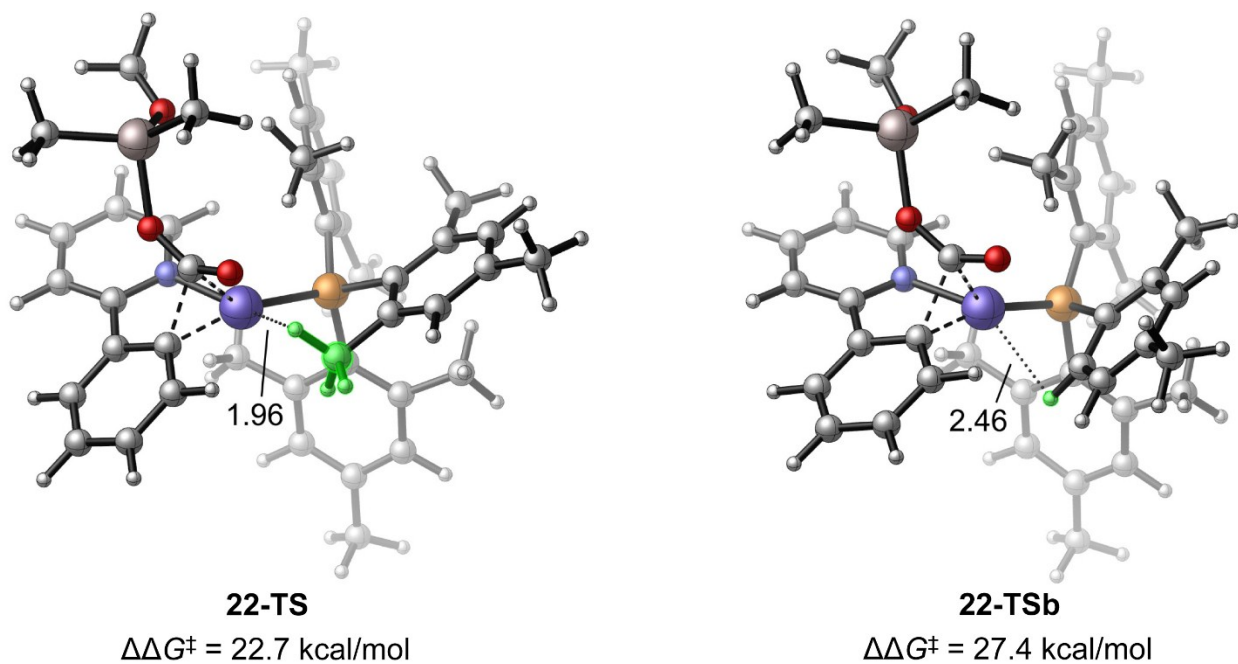

**Fig. S7** Comparison of the transition states with and without the agostic C–H···Rh interaction.



## Cartesian coordinates (Å) and energies of the optimized structures

1

B3LYP SCF energy: -479.33520445 a.u.  
B3LYP enthalpy: -479.155249 a.u.  
B3LYP free energy: -479.199794 a.u.  
M06 SCF energy in solution: -479.09778143 a.u.  
M06 enthalpy in solution: -478.917826 a.u.  
M06 free energy in solution: -478.962371 a.u.  
Three lowest frequencies (cm-1): 42.2727 95.2702 156.4448

### Cartesian coordinates

| ATOM | X         | Y         | Z         |
|------|-----------|-----------|-----------|
| C    | -0.763164 | 0.031256  | -0.000262 |
| C    | -2.700261 | -1.206292 | -0.203474 |
| C    | -3.520052 | -0.091187 | -0.022866 |
| C    | -2.901183 | 1.139132  | 0.194468  |
| C    | -1.510813 | 1.203202  | 0.211856  |
| C    | 0.725258  | 0.029001  | -0.004018 |
| C    | 1.417554  | -1.179765 | 0.181548  |
| C    | 2.810039  | -1.209019 | 0.192093  |
| C    | 3.541726  | -0.032716 | 0.010082  |
| C    | 2.866224  | 1.172859  | -0.187683 |
| C    | 1.472077  | 1.203367  | -0.195334 |
| H    | -3.138340 | -2.190560 | -0.365246 |
| H    | -4.601117 | -0.189198 | -0.044140 |
| H    | -3.491634 | 2.036957  | 0.357529  |
| H    | -1.014515 | 2.147248  | 0.408529  |
| H    | 0.841480  | -2.088547 | 0.315088  |
| H    | 3.326666  | -2.153278 | 0.343490  |
| H    | 4.628221  | -0.056108 | 0.016853  |
| H    | 3.424482  | 2.092109  | -0.344373 |
| H    | 0.968438  | 2.148014  | -0.377564 |
| N    | -1.366874 | -1.157952 | -0.195519 |

3

B3LYP SCF energy: -518.64783762 a.u.  
B3LYP enthalpy: -518.438496 a.u.  
B3LYP free energy: -518.486241 a.u.  
M06 SCF energy in solution: -518.38941459 a.u.  
M06 enthalpy in solution: -518.180073 a.u.  
M06 free energy in solution: -518.227818 a.u.  
Three lowest frequencies (cm-1): 56.5314 89.0336 119.4249

Cartesian coordinates

| ATOM | X         | Y         | Z         |
|------|-----------|-----------|-----------|
| C    | 0.839517  | -0.162672 | -0.023578 |
| C    | 2.779072  | 0.902557  | -0.666619 |
| C    | 3.593107  | -0.068981 | -0.083137 |
| C    | 2.971624  | -1.131251 | 0.572735  |
| C    | 1.580773  | -1.178934 | 0.606437  |
| C    | -0.650662 | -0.213886 | -0.042240 |
| C    | -1.457185 | 0.927357  | 0.187298  |
| C    | -2.848799 | 0.770221  | 0.153556  |
| C    | -3.450587 | -0.461475 | -0.105258 |
| C    | -2.653824 | -1.581984 | -0.332710 |
| C    | -1.267277 | -1.450345 | -0.295913 |
| H    | 3.222774  | 1.753466  | -1.182283 |
| H    | 4.674616  | 0.012356  | -0.135862 |
| H    | 3.559653  | -1.906215 | 1.057590  |
| H    | 1.066615  | -1.980202 | 1.127425  |
| H    | -3.474344 | 1.640018  | 0.340865  |
| H    | -4.534265 | -0.542069 | -0.127323 |
| H    | -3.103785 | -2.548561 | -0.542379 |
| H    | -0.642904 | -2.317511 | -0.494021 |
| N    | 1.443340  | 0.868483  | -0.644655 |
| C    | -0.882764 | 2.293155  | 0.489783  |
| H    | -0.103007 | 2.245587  | 1.257707  |
| H    | -0.416617 | 2.734544  | -0.395768 |
| H    | -1.670086 | 2.966630  | 0.844518  |

4

|                                  |                     |         |         |
|----------------------------------|---------------------|---------|---------|
| B3LYP SCF energy:                | -3349.94808296 a.u. |         |         |
| B3LYP enthalpy:                  | -3348.825788 a.u.   |         |         |
| B3LYP free energy:               | -3348.993386 a.u.   |         |         |
| M06 SCF energy in solution:      | -3349.94614752 a.u. |         |         |
| M06 enthalpy in solution:        | -3348.823853 a.u.   |         |         |
| M06 free energy in solution:     | -3348.991451 a.u.   |         |         |
| Three lowest frequencies (cm-1): | 13.7813             | 16.5388 | 24.0661 |

Cartesian coordinates

| ATOM | X         | Y         | Z         |
|------|-----------|-----------|-----------|
| Rh   | -0.058930 | -0.307498 | -0.141816 |
| P    | -2.501188 | -0.205856 | 0.004567  |
| C    | -3.087708 | 1.412840  | -0.765330 |
| C    | -2.764493 | 1.611839  | -2.142034 |

|   |           |           |           |
|---|-----------|-----------|-----------|
| C | -2.969548 | 2.864577  | -2.730207 |
| H | -2.715445 | 2.985652  | -3.781094 |
| C | -3.494535 | 3.948251  | -2.027803 |
| C | -3.878475 | 3.719924  | -0.709850 |
| H | -4.351419 | 4.527039  | -0.154033 |
| C | -3.710624 | 2.484647  | -0.064339 |
| C | -2.267117 | 0.513873  | -3.050453 |
| H | -2.113475 | 0.902051  | -4.062159 |
| H | -2.980015 | -0.315024 | -3.119000 |
| H | -1.328875 | 0.068472  | -2.712490 |
| C | -3.654364 | 5.303482  | -2.673470 |
| H | -3.899908 | 5.214948  | -3.737560 |
| H | -2.726288 | 5.886925  | -2.603637 |
| H | -4.443481 | 5.888641  | -2.189159 |
| C | -4.307085 | 2.417091  | 1.329889  |
| H | -3.557799 | 2.439882  | 2.125963  |
| H | -4.906555 | 1.517257  | 1.482340  |
| H | -4.967069 | 3.277400  | 1.478863  |
| C | -3.540720 | -1.620200 | -0.626968 |
| C | -4.729596 | -1.488604 | -1.396617 |
| C | -5.316623 | -2.638607 | -1.942354 |
| H | -6.223211 | -2.521671 | -2.532699 |
| C | -4.804441 | -3.919053 | -1.742961 |
| C | -3.692871 | -4.038680 | -0.910894 |
| H | -3.301315 | -5.028264 | -0.685756 |
| C | -3.055618 | -2.929529 | -0.345220 |
| C | -5.497389 | -0.200293 | -1.630825 |
| H | -5.056438 | 0.429164  | -2.408881 |
| H | -5.570105 | 0.417425  | -0.732409 |
| H | -6.517003 | -0.442707 | -1.946977 |
| C | -5.435700 | -5.127761 | -2.390354 |
| H | -5.338549 | -6.018522 | -1.760001 |
| H | -4.952436 | -5.355941 | -3.349815 |
| H | -6.500185 | -4.966312 | -2.592251 |
| C | -1.917842 | -3.209052 | 0.608401  |
| H | -1.748263 | -4.287469 | 0.686801  |
| H | -2.129460 | -2.829196 | 1.615176  |
| H | -0.990212 | -2.739664 | 0.268151  |
| C | -2.777101 | -0.094367 | 1.862178  |
| C | -3.837168 | -0.665632 | 2.608415  |
| C | -3.823859 | -0.544961 | 4.008845  |
| H | -4.638310 | -0.999026 | 4.569319  |
| C | -2.832460 | 0.140694  | 4.705405  |
| C | -1.816475 | 0.736561  | 3.952693  |
| H | -1.037456 | 1.303939  | 4.458581  |

|   |           |           |           |
|---|-----------|-----------|-----------|
| C | -1.770418 | 0.618027  | 2.563497  |
| C | -5.037356 | -1.379300 | 2.020809  |
| H | -4.788432 | -2.369876 | 1.629015  |
| H | -5.490711 | -0.821052 | 1.198204  |
| H | -5.801616 | -1.509371 | 2.793491  |
| C | -2.844840 | 0.231861  | 6.212326  |
| H | -3.829400 | -0.017313 | 6.620919  |
| H | -2.578863 | 1.238225  | 6.555740  |
| H | -2.119039 | -0.462132 | 6.656714  |
| C | -0.621142 | 1.278734  | 1.843027  |
| H | -0.919543 | 1.910157  | 1.003227  |
| H | 0.136898  | 0.496169  | 1.543198  |
| H | -0.025643 | 1.905595  | 2.514361  |
| P | 2.362334  | 0.013424  | -0.054706 |
| C | 3.394425  | -0.758521 | 1.334673  |
| C | 4.810346  | -0.590512 | 1.380049  |
| C | 5.565819  | -1.289310 | 2.326519  |
| H | 6.643259  | -1.136288 | 2.341019  |
| C | 4.992936  | -2.163237 | 3.250993  |
| C | 3.609384  | -2.294964 | 3.221079  |
| H | 3.126341  | -2.951300 | 3.941952  |
| C | 2.797888  | -1.615197 | 2.298719  |
| C | 5.592803  | 0.351923  | 0.491698  |
| H | 5.086118  | 1.309901  | 0.360303  |
| H | 5.761974  | -0.067243 | -0.503843 |
| H | 6.571233  | 0.555994  | 0.938120  |
| C | 5.843339  | -2.932147 | 4.233161  |
| H | 5.240193  | -3.346718 | 5.047323  |
| H | 6.619961  | -2.296556 | 4.674322  |
| H | 6.355078  | -3.770336 | 3.741900  |
| C | 1.313276  | -1.852693 | 2.467425  |
| H | 0.754529  | -1.823326 | 1.525136  |
| H | 0.864146  | -1.091656 | 3.120415  |
| H | 1.137961  | -2.822346 | 2.945204  |
| C | 3.389460  | -0.528206 | -1.546798 |
| C | 3.397270  | -1.938511 | -1.770779 |
| C | 4.009930  | -2.456511 | -2.915487 |
| H | 3.988641  | -3.533935 | -3.064258 |
| C | 4.640535  | -1.652517 | -3.861915 |
| C | 4.690509  | -0.288538 | -3.596002 |
| H | 5.225036  | 0.363403  | -4.284809 |
| C | 4.096254  | 0.296562  | -2.466709 |
| C | 2.857165  | -2.968994 | -0.801309 |
| H | 2.649951  | -3.901578 | -1.333597 |
| H | 1.925406  | -2.661943 | -0.329212 |

|    |          |           |           |
|----|----------|-----------|-----------|
| H  | 3.592505 | -3.183355 | -0.016144 |
| C  | 5.244744 | -2.236521 | -5.115990 |
| H  | 6.038417 | -1.596083 | -5.515886 |
| H  | 4.486585 | -2.347734 | -5.902755 |
| H  | 5.668000 | -3.230590 | -4.933365 |
| C  | 4.348837 | 1.790757  | -2.354253 |
| H  | 4.312212 | 2.171691  | -1.338090 |
| H  | 3.628587 | 2.370351  | -2.941992 |
| H  | 5.341870 | 2.015255  | -2.758383 |
| C  | 2.343291 | 1.887654  | 0.154409  |
| C  | 2.705005 | 2.579641  | 1.346047  |
| C  | 2.584319 | 3.978204  | 1.388591  |
| H  | 2.877605 | 4.489077  | 2.303370  |
| C  | 2.099794 | 4.732987  | 0.324189  |
| C  | 1.671248 | 4.033849  | -0.803496 |
| H  | 1.238266 | 4.584042  | -1.636628 |
| C  | 1.755408 | 2.642247  | -0.904101 |
| C  | 3.168531 | 1.944145  | 2.645172  |
| H  | 4.190401 | 1.559889  | 2.598871  |
| H  | 2.534887 | 1.109589  | 2.954338  |
| H  | 3.138410 | 2.694292  | 3.441793  |
| C  | 2.032871 | 6.239815  | 0.389227  |
| H  | 2.011745 | 6.596444  | 1.424461  |
| H  | 1.142975 | 6.624057  | -0.121724 |
| H  | 2.906095 | 6.696532  | -0.096046 |
| C  | 1.132827 | 2.034853  | -2.144634 |
| H  | 0.094493 | 1.758747  | -1.929720 |
| H  | 1.619554 | 1.129703  | -2.505893 |
| H  | 1.124331 | 2.768059  | -2.959277 |
| Cl | 0.037153 | -1.780778 | -2.006056 |

5

B3LYP SCF energy: -2929.60987979 a.u.  
 B3LYP enthalpy: -2928.452400 a.u.  
 B3LYP free energy: -2928.621767 a.u.  
 M06 SCF energy in solution: -2929.57282429 a.u.  
 M06 enthalpy in solution: -2928.415345 a.u.  
 M06 free energy in solution: -2928.584712 a.u.  
 Three lowest frequencies (cm-1): 10.6180 14.0763 22.2803

Cartesian coordinates

| ATOM | X         | Y         | Z         |
|------|-----------|-----------|-----------|
| Rh   | -0.058985 | -0.242132 | -0.253663 |

|   |           |           |           |
|---|-----------|-----------|-----------|
| C | 0.009515  | -1.561899 | -1.826104 |
| H | 0.602670  | -1.133372 | -2.643855 |
| H | -0.987542 | -1.811295 | -2.197234 |
| H | 0.485143  | -2.490122 | -1.501286 |
| P | -2.458358 | -0.231648 | -0.038921 |
| C | -3.360375 | 1.183223  | -0.917505 |
| C | -3.023143 | 1.420858  | -2.281924 |
| C | -3.472445 | 2.576792  | -2.927628 |
| H | -3.198456 | 2.724645  | -3.970376 |
| C | -4.263055 | 3.531570  | -2.289129 |
| C | -4.664467 | 3.246687  | -0.987413 |
| H | -5.344856 | 3.932517  | -0.486144 |
| C | -4.260071 | 2.094271  | -0.294582 |
| C | -2.244747 | 0.439728  | -3.123958 |
| H | -2.241434 | 0.758017  | -4.171355 |
| H | -2.675719 | -0.566675 | -3.083691 |
| H | -1.212480 | 0.346773  | -2.784458 |
| C | -4.683270 | 4.801808  | -2.988086 |
| H | -4.879750 | 4.628672  | -4.052213 |
| H | -3.897060 | 5.566439  | -2.925955 |
| H | -5.587461 | 5.227392  | -2.539889 |
| C | -4.925281 | 1.907395  | 1.057142  |
| H | -4.296117 | 2.218996  | 1.896117  |
| H | -5.211827 | 0.870396  | 1.239721  |
| H | -5.838575 | 2.510434  | 1.091464  |
| C | -3.284234 | -1.860294 | -0.470810 |
| C | -4.448388 | -2.008679 | -1.277102 |
| C | -4.827376 | -3.289070 | -1.706754 |
| H | -5.718178 | -3.380061 | -2.324945 |
| C | -4.130258 | -4.444031 | -1.360254 |
| C | -3.039989 | -4.294238 | -0.505774 |
| H | -2.504316 | -5.179573 | -0.169348 |
| C | -2.605053 | -3.044597 | -0.049975 |
| C | -5.398404 | -0.894261 | -1.675610 |
| H | -5.004166 | -0.251033 | -2.467089 |
| H | -5.650712 | -0.242070 | -0.836316 |
| H | -6.331787 | -1.331331 | -2.044329 |
| C | -4.544216 | -5.799749 | -1.879778 |
| H | -4.329574 | -6.591316 | -1.153339 |
| H | -4.003375 | -6.051606 | -2.802089 |
| H | -5.614260 | -5.831295 | -2.112183 |
| C | -1.458461 | -3.051565 | 0.933147  |
| H | -1.079049 | -4.069543 | 1.068109  |
| H | -1.760956 | -2.673994 | 1.916756  |
| H | -0.633807 | -2.402220 | 0.599225  |

|   |           |           |           |
|---|-----------|-----------|-----------|
| C | -2.686062 | 0.115761  | 1.792958  |
| C | -3.491534 | -0.627725 | 2.697159  |
| C | -3.432064 | -0.333533 | 4.068417  |
| H | -4.050406 | -0.919206 | 4.745822  |
| C | -2.644717 | 0.688383  | 4.592623  |
| C | -1.917902 | 1.460482  | 3.685385  |
| H | -1.331283 | 2.299905  | 4.053600  |
| C | -1.918459 | 1.199262  | 2.311587  |
| C | -4.502584 | -1.690291 | 2.308283  |
| H | -4.044950 | -2.653208 | 2.064079  |
| H | -5.100216 | -1.402279 | 1.440181  |
| H | -5.190435 | -1.857621 | 3.143342  |
| C | -2.585299 | 0.956679  | 6.077386  |
| H | -3.481733 | 0.588563  | 6.587671  |
| H | -2.488999 | 2.027619  | 6.288362  |
| H | -1.720969 | 0.458229  | 6.536800  |
| C | -1.153064 | 2.178072  | 1.443994  |
| H | -1.834681 | 2.832338  | 0.887452  |
| H | -0.514767 | 1.709776  | 0.672860  |
| H | -0.504676 | 2.811280  | 2.056624  |
| P | 2.421233  | 0.089973  | -0.117793 |
| C | 3.286548  | -0.608156 | 1.407723  |
| C | 4.637096  | -1.055299 | 1.436031  |
| C | 5.110647  | -1.744506 | 2.561821  |
| H | 6.146686  | -2.078277 | 2.561148  |
| C | 4.322571  | -1.998972 | 3.682557  |
| C | 3.027580  | -1.483643 | 3.676808  |
| H | 2.401212  | -1.609329 | 4.557615  |
| C | 2.501850  | -0.793494 | 2.578891  |
| C | 5.674389  | -0.799580 | 0.359184  |
| H | 5.563879  | 0.181034  | -0.106292 |
| H | 5.638792  | -1.541362 | -0.444595 |
| H | 6.674317  | -0.843226 | 0.803955  |
| C | 4.852546  | -2.786210 | 4.856733  |
| H | 4.395590  | -2.460557 | 5.797635  |
| H | 5.939031  | -2.683936 | 4.951890  |
| H | 4.635579  | -3.857248 | 4.745028  |
| C | 1.118090  | -0.219564 | 2.737756  |
| H | 0.414486  | -0.637694 | 1.995772  |
| H | 1.115306  | 0.867983  | 2.603023  |
| H | 0.719477  | -0.428949 | 3.734644  |
| C | 3.394932  | -0.659822 | -1.539067 |
| C | 3.284567  | -2.074892 | -1.676252 |
| C | 3.787428  | -2.705128 | -2.819541 |
| H | 3.681774  | -3.785354 | -2.900987 |

|   |          |           |           |
|---|----------|-----------|-----------|
| C | 4.425122 | -2.004867 | -3.842092 |
| C | 4.614712 | -0.638388 | -3.649459 |
| H | 5.176424 | -0.076111 | -4.393101 |
| C | 4.140869 | 0.049150  | -2.522214 |
| C | 2.760139 | -2.996776 | -0.592273 |
| H | 2.401751 | -3.932498 | -1.032920 |
| H | 1.948148 | -2.563961 | -0.006963 |
| H | 3.562929 | -3.248514 | 0.112387  |
| C | 4.905172 | -2.700103 | -5.093361 |
| H | 5.744893 | -2.167116 | -5.552528 |
| H | 4.106041 | -2.757739 | -5.844739 |
| H | 5.226499 | -3.726690 | -4.884871 |
| C | 4.577598 | 1.500360  | -2.430016 |
| H | 4.841395 | 1.798013  | -1.413768 |
| H | 3.814749 | 2.205796  | -2.772228 |
| H | 5.460491 | 1.647763  | -3.060451 |
| C | 2.605345 | 1.970879  | -0.112763 |
| C | 3.263917 | 2.744085  | 0.885281  |
| C | 3.179568 | 4.145748  | 0.835023  |
| H | 3.690434 | 4.716674  | 1.607331  |
| C | 2.489982 | 4.834000  | -0.157930 |
| C | 1.870032 | 4.068591  | -1.144484 |
| H | 1.335988 | 4.570240  | -1.949010 |
| C | 1.902826 | 2.671181  | -1.142862 |
| C | 4.104359 | 2.207224  | 2.029123  |
| H | 4.904524 | 1.547621  | 1.688725  |
| H | 3.521490 | 1.643919  | 2.762384  |
| H | 4.572108 | 3.044096  | 2.556935  |
| C | 2.412259 | 6.341890  | -0.169323 |
| H | 3.110870 | 6.784335  | 0.548251  |
| H | 1.404378 | 6.690690  | 0.091731  |
| H | 2.644050 | 6.747759  | -1.161297 |
| C | 1.160747 | 1.985532  | -2.262949 |
| H | 0.315198 | 1.408652  | -1.848527 |
| H | 1.772083 | 1.266729  | -2.816582 |
| H | 0.774439 | 2.722454  | -2.974388 |

6

|                             |                     |
|-----------------------------|---------------------|
| B3LYP SCF energy:           | -2439.19678323 a.u. |
| B3LYP enthalpy:             | -2438.451272 a.u.   |
| B3LYP free energy:          | -2438.573589 a.u.   |
| M06 SCF energy in solution: | -2439.48927988 a.u. |
| M06 enthalpy in solution:   | -2438.743769 a.u.   |



M06 free energy in solution: -2438.866086 a.u.  
Three lowest frequencies (cm-1): 25.4183 26.5160 30.8755

Cartesian coordinates

| ATOM | X         | Y         | Z         |
|------|-----------|-----------|-----------|
| Rh   | 1.490007  | -0.276274 | -0.460517 |
| N    | 2.269325  | 1.662833  | -0.247039 |
| C    | 4.056639  | 3.666969  | 0.543989  |
| C    | 1.823345  | 2.877103  | 0.125449  |
| C    | 3.611942  | 1.443156  | -0.255810 |
| C    | 4.526223  | 2.414189  | 0.144656  |
| C    | 2.682987  | 3.899344  | 0.522867  |
| H    | 0.751099  | 3.017213  | 0.119096  |
| H    | 5.586771  | 2.184811  | 0.124598  |
| H    | 2.267281  | 4.857738  | 0.817210  |
| H    | 4.749467  | 4.443577  | 0.854467  |
| C    | 3.981196  | 0.075432  | -0.701850 |
| C    | 4.791875  | -2.433030 | -1.661794 |
| C    | 4.836360  | -0.742921 | 0.069545  |
| C    | 3.548083  | -0.378114 | -1.971701 |
| C    | 3.968501  | -1.634241 | -2.440982 |
| C    | 5.228912  | -1.984574 | -0.404495 |
| H    | 5.164762  | -0.396159 | 1.045624  |
| H    | 3.639039  | -1.974668 | -3.417945 |
| H    | 5.869481  | -2.616846 | 0.203625  |
| H    | 5.102147  | -3.408877 | -2.023948 |
| P    | -0.787334 | -0.153861 | 0.067842  |
| C    | -0.923712 | -1.202200 | 1.619566  |
| C    | -0.163098 | -0.778196 | 2.746929  |
| C    | -0.224502 | -1.502655 | 3.939922  |
| H    | 0.350738  | -1.145801 | 4.792057  |
| C    | -0.973838 | -2.671359 | 4.066158  |
| C    | -1.617080 | -3.135871 | 2.922599  |
| H    | -2.143981 | -4.086700 | 2.965985  |
| C    | -1.589646 | -2.456478 | 1.695340  |
| C    | 0.793768  | 0.393202  | 2.727882  |
| H    | 0.379772  | 1.304844  | 2.291277  |
| H    | 1.672829  | 0.131222  | 2.123206  |
| H    | 1.126701  | 0.628920  | 3.744640  |
| C    | -1.062030 | -3.411688 | 5.378915  |
| H    | -0.136212 | -3.313619 | 5.956638  |
| H    | -1.254772 | -4.478756 | 5.224962  |
| H    | -1.876751 | -3.019972 | 6.003537  |
| C    | -2.213281 | -3.201356 | 0.531171  |
| H    | -1.558933 | -3.186875 | -0.342068 |

|    |           |           |           |
|----|-----------|-----------|-----------|
| H  | -3.188769 | -2.809795 | 0.230948  |
| H  | -2.356302 | -4.248226 | 0.816538  |
| C  | -1.478967 | 1.598572  | 0.372146  |
| C  | -2.072661 | 2.117574  | 1.560318  |
| C  | -2.493125 | 3.459089  | 1.595405  |
| H  | -2.944114 | 3.824196  | 2.516074  |
| C  | -2.382128 | 4.326811  | 0.516098  |
| C  | -1.832658 | 3.803899  | -0.652972 |
| H  | -1.746984 | 4.442164  | -1.530168 |
| C  | -1.385147 | 2.481666  | -0.752926 |
| C  | -2.355694 | 1.373424  | 2.854747  |
| H  | -1.531671 | 1.481231  | 3.568767  |
| H  | -2.527414 | 0.309513  | 2.730576  |
| H  | -3.244610 | 1.804808  | 3.326559  |
| C  | -2.833651 | 5.765096  | 0.600891  |
| H  | -3.390434 | 6.063451  | -0.294915 |
| H  | -1.977912 | 6.447821  | 0.689054  |
| H  | -3.476944 | 5.931613  | 1.470948  |
| C  | -0.821728 | 2.096876  | -2.105937 |
| H  | -0.612050 | 2.997841  | -2.691270 |
| H  | -1.528491 | 1.486619  | -2.676343 |
| H  | 0.105121  | 1.521168  | -2.022133 |
| C  | -2.067755 | -0.705409 | -1.222901 |
| C  | -3.464138 | -0.595234 | -0.946375 |
| C  | -4.401113 | -0.898584 | -1.939078 |
| H  | -5.457802 | -0.816575 | -1.691868 |
| C  | -4.033758 | -1.308782 | -3.219474 |
| C  | -2.673239 | -1.425636 | -3.476511 |
| H  | -2.351496 | -1.757433 | -4.461089 |
| C  | -1.681509 | -1.141274 | -2.522283 |
| C  | -4.057534 | -0.201901 | 0.389217  |
| H  | -4.082023 | 0.884079  | 0.519424  |
| H  | -3.509190 | -0.624778 | 1.230953  |
| H  | -5.088468 | -0.563784 | 0.455734  |
| C  | -5.069826 | -1.601091 | -4.277921 |
| H  | -5.913220 | -2.167857 | -3.866851 |
| H  | -4.644811 | -2.177788 | -5.105750 |
| H  | -5.480403 | -0.673377 | -4.698652 |
| C  | -0.266846 | -1.360296 | -3.004421 |
| H  | -0.249304 | -1.399542 | -4.099079 |
| H  | 0.142715  | -2.296219 | -2.612451 |
| H  | 0.422872  | -0.581097 | -2.666664 |
| H  | 3.010023  | 0.293785  | -2.632308 |
| C1 | 1.325862  | -2.667090 | -0.338376 |

7

|                                  |                     |         |         |
|----------------------------------|---------------------|---------|---------|
| B3LYP SCF energy:                | -2018.85261487 a.u. |         |         |
| B3LYP enthalpy:                  | -2018.072615 a.u.   |         |         |
| B3LYP free energy:               | -2018.196590 a.u.   |         |         |
| M06 SCF energy in solution:      | -2019.11253351 a.u. |         |         |
| M06 enthalpy in solution:        | -2018.332534 a.u.   |         |         |
| M06 free energy in solution:     | -2018.456509 a.u.   |         |         |
| Three lowest frequencies (cm-1): | 19.4973             | 22.5871 | 28.7001 |

Cartesian coordinates

| ATOM | X         | Y         | Z         |
|------|-----------|-----------|-----------|
| Rh   | -1.446654 | -0.549797 | 0.421948  |
| C    | -1.128103 | -2.572587 | 0.144265  |
| H    | -1.385863 | -2.779755 | -0.904948 |
| H    | -1.820943 | -3.117884 | 0.796065  |
| H    | -0.119508 | -2.967044 | 0.314321  |
| N    | -2.605056 | 1.453006  | 0.256275  |
| C    | -4.814311 | 2.748935  | -0.855592 |
| C    | -2.493028 | 2.691298  | -0.245636 |
| C    | -3.818632 | 0.850467  | 0.233867  |
| C    | -4.943948 | 1.466915  | -0.320688 |
| C    | -3.569401 | 3.375550  | -0.812246 |
| H    | -1.503575 | 3.134084  | -0.204580 |
| H    | -5.899557 | 0.952556  | -0.313152 |
| H    | -3.425225 | 4.374595  | -1.211680 |
| H    | -5.674297 | 3.252971  | -1.288265 |
| C    | -3.809859 | -0.514056 | 0.813871  |
| C    | -4.114428 | -2.971327 | 2.163699  |
| C    | -4.569751 | -1.569261 | 0.240545  |
| C    | -3.185470 | -0.725727 | 2.079870  |
| C    | -3.376696 | -1.957176 | 2.747989  |
| C    | -4.708198 | -2.777292 | 0.897457  |
| H    | -5.034777 | -1.416549 | -0.730182 |
| H    | -2.940293 | -2.095051 | 3.733633  |
| H    | -5.280243 | -3.579697 | 0.439725  |
| H    | -4.248855 | -3.916670 | 2.682673  |
| P    | 0.816941  | -0.176425 | -0.071877 |
| C    | 1.172211  | -1.204476 | -1.607482 |
| C    | 0.318912  | -0.979677 | -2.729815 |
| C    | 0.497569  | -1.720139 | -3.901221 |
| H    | -0.153553 | -1.512280 | -4.748077 |
| C    | 1.460091  | -2.722998 | -4.014159 |
| C    | 2.212981  | -3.005143 | -2.878468 |

|   |           |           |           |
|---|-----------|-----------|-----------|
| H | 2.925977  | -3.826233 | -2.912207 |
| C | 2.084031  | -2.294201 | -1.674249 |
| C | -0.842610 | -0.012138 | -2.721116 |
| H | -0.584384 | 0.996748  | -2.391897 |
| H | -1.616854 | -0.370433 | -2.022316 |
| H | -1.283883 | 0.061535  | -3.721185 |
| C | 1.662203  | -3.478716 | -5.305497 |
| H | 0.714212  | -3.630772 | -5.833834 |
| H | 2.113767  | -4.460739 | -5.129022 |
| H | 2.327601  | -2.931449 | -5.987278 |
| C | 2.913737  | -2.834710 | -0.523724 |
| H | 2.321117  | -2.975585 | 0.382920  |
| H | 3.757436  | -2.194209 | -0.255901 |
| H | 3.320943  | -3.811119 | -0.804180 |
| C | 1.144582  | 1.671181  | -0.399456 |
| C | 1.596168  | 2.288266  | -1.601021 |
| C | 1.686018  | 3.689652  | -1.669699 |
| H | 2.033058  | 4.130878  | -2.602399 |
| C | 1.382115  | 4.527974  | -0.603731 |
| C | 0.987912  | 3.913844  | 0.584696  |
| H | 0.771173  | 4.532147  | 1.453872  |
| C | 0.860863  | 2.525979  | 0.713505  |
| C | 2.056183  | 1.593887  | -2.872142 |
| H | 1.249143  | 1.523073  | -3.610169 |
| H | 2.429883  | 0.586996  | -2.716693 |
| H | 2.856706  | 2.183225  | -3.331831 |
| C | 1.474085  | 6.030678  | -0.722129 |
| H | 1.886140  | 6.480100  | 0.188588  |
| H | 0.484804  | 6.480140  | -0.883044 |
| H | 2.108058  | 6.327984  | -1.564016 |
| C | 0.445259  | 2.038859  | 2.086973  |
| H | -0.000352 | 2.862034  | 2.655077  |
| H | 1.304556  | 1.668432  | 2.655939  |
| H | -0.286546 | 1.226555  | 2.032722  |
| C | 2.183928  | -0.468146 | 1.216592  |
| C | 3.512253  | 0.007822  | 1.003042  |
| C | 4.455704  | -0.059052 | 2.033350  |
| H | 5.462210  | 0.304634  | 1.834574  |
| C | 4.159677  | -0.581748 | 3.291684  |
| C | 2.876839  | -1.083606 | 3.478450  |
| H | 2.619931  | -1.528950 | 4.437285  |
| C | 1.888706  | -1.052356 | 2.480680  |
| C | 4.037029  | 0.551253  | -0.308959 |
| H | 3.820128  | 1.616717  | -0.429739 |
| H | 3.619048  | 0.030519  | -1.170981 |

|   |           |           |           |
|---|-----------|-----------|-----------|
| H | 5.124619  | 0.430433  | -0.348229 |
| C | 5.187819  | -0.598504 | 4.397110  |
| H | 6.184242  | -0.847287 | 4.014251  |
| H | 4.930160  | -1.326238 | 5.173550  |
| H | 5.265344  | 0.384475  | 4.881001  |
| C | 0.580305  | -1.703666 | 2.862966  |
| H | 0.489197  | -1.751072 | 3.953557  |
| H | 0.527972  | -2.731555 | 2.483507  |
| H | -0.290999 | -1.190226 | 2.444235  |
| H | -2.793497 | 0.121019  | 2.633406  |

8-TS

|                                  |                     |         |         |
|----------------------------------|---------------------|---------|---------|
| B3LYP SCF energy:                | -2439.18012207 a.u. |         |         |
| B3LYP enthalpy:                  | -2438.439546 a.u.   |         |         |
| B3LYP free energy:               | -2438.561599 a.u.   |         |         |
| M06 SCF energy in solution:      | -2439.46939650 a.u. |         |         |
| M06 enthalpy in solution:        | -2438.728820 a.u.   |         |         |
| M06 free energy in solution:     | -2438.850873 a.u.   |         |         |
| Three lowest frequencies (cm-1): | -762.7738           | 18.2258 | 24.8480 |
| Imaginary frequency:             | -762.7738 cm-1      |         |         |

Cartesian coordinates

| ATOM | X        | Y         | Z         |
|------|----------|-----------|-----------|
| Rh   | 1.656096 | -0.381427 | -0.537721 |
| N    | 2.484271 | 1.508449  | -0.084718 |
| C    | 3.806004 | 3.901908  | 0.509102  |
| C    | 1.809617 | 2.594729  | 0.331742  |
| C    | 3.847228 | 1.580059  | -0.177591 |
| C    | 4.516471 | 2.780316  | 0.102471  |
| C    | 2.421004 | 3.804221  | 0.639017  |
| H    | 0.739630 | 2.484869  | 0.423193  |
| H    | 5.594636 | 2.824711  | 0.002736  |
| H    | 1.812600 | 4.641303  | 0.964192  |
| H    | 4.324284 | 4.831586  | 0.726121  |
| C    | 4.509952 | 0.330779  | -0.551870 |
| C    | 5.632081 | -2.139585 | -1.211491 |
| C    | 5.903886 | 0.161203  | -0.537792 |
| C    | 3.661335 | -0.755069 | -0.883175 |
| C    | 4.246323 | -1.984381 | -1.228039 |
| C    | 6.464019 | -1.069430 | -0.864870 |
| H    | 6.557628 | 0.980994  | -0.253329 |
| H    | 2.561871 | -0.373195 | -1.843571 |
| H    | 3.603028 | -2.813759 | -1.497592 |

|   |           |           |           |
|---|-----------|-----------|-----------|
| H | 7.543318  | -1.193899 | -0.852704 |
| H | 6.067194  | -3.102112 | -1.469233 |
| P | -0.970975 | -0.162638 | -0.000357 |
| C | -1.086820 | -1.511165 | 1.299034  |
| C | -0.234627 | -1.357370 | 2.427460  |
| C | -0.256692 | -2.303285 | 3.455019  |
| H | 0.392672  | -2.151357 | 4.314931  |
| C | -1.063401 | -3.439064 | 3.401865  |
| C | -1.804962 | -3.634369 | 2.239607  |
| H | -2.381369 | -4.550797 | 2.133107  |
| C | -1.817692 | -2.723434 | 1.172764  |
| C | 0.777200  | -0.240247 | 2.564278  |
| H | 0.381945  | 0.755137  | 2.347416  |
| H | 1.626338  | -0.411747 | 1.881979  |
| H | 1.189218  | -0.220063 | 3.578691  |
| C | -1.111541 | -4.425016 | 4.544067  |
| H | -1.375191 | -5.429212 | 4.195626  |
| H | -1.861767 | -4.131860 | 5.291355  |
| H | -0.147436 | -4.487171 | 5.060735  |
| C | -2.543000 | -3.191158 | -0.073375 |
| H | -1.919316 | -3.062209 | -0.960267 |
| H | -3.490789 | -2.678510 | -0.253552 |
| H | -2.762890 | -4.258937 | 0.021957  |
| C | -1.607127 | 1.487312  | 0.706615  |
| C | -2.134164 | 1.754905  | 2.005101  |
| C | -2.497076 | 3.068904  | 2.343932  |
| H | -2.893428 | 3.244315  | 3.342163  |
| C | -2.389990 | 4.145230  | 1.468859  |
| C | -1.893219 | 3.872887  | 0.196683  |
| H | -1.800676 | 4.684478  | -0.522341 |
| C | -1.506758 | 2.587596  | -0.202009 |
| C | -2.381393 | 0.750115  | 3.116798  |
| H | -1.492374 | 0.605386  | 3.739552  |
| H | -2.681538 | -0.233838 | 2.767134  |
| H | -3.171944 | 1.128700  | 3.772688  |
| C | -2.827351 | 5.534496  | 1.867373  |
| H | -2.704907 | 5.700914  | 2.943021  |
| H | -3.887399 | 5.698900  | 1.631790  |
| H | -2.255588 | 6.303179  | 1.336127  |
| C | -0.998976 | 2.476662  | -1.626009 |
| H | -0.701477 | 3.463817  | -1.993833 |
| H | -1.772110 | 2.090765  | -2.297894 |
| H | -0.134723 | 1.813507  | -1.719591 |
| C | -2.283773 | -0.400753 | -1.341158 |
| C | -3.672702 | -0.297060 | -1.033969 |

|    |           |           |           |
|----|-----------|-----------|-----------|
| C  | -4.620766 | -0.352869 | -2.060558 |
| H  | -5.673666 | -0.285007 | -1.793684 |
| C  | -4.268546 | -0.499464 | -3.401377 |
| C  | -2.912714 | -0.608277 | -3.690346 |
| H  | -2.603495 | -0.735769 | -4.725359 |
| C  | -1.912512 | -0.565328 | -2.705369 |
| C  | -4.243232 | -0.160154 | 0.360903  |
| H  | -4.243658 | 0.880374  | 0.700465  |
| H  | -3.693066 | -0.746633 | 1.096591  |
| H  | -5.280787 | -0.509167 | 0.371834  |
| C  | -5.313985 | -0.520346 | -4.490382 |
| H  | -4.944321 | -1.021230 | -5.391049 |
| H  | -5.606154 | 0.498572  | -4.778445 |
| H  | -6.223621 | -1.035807 | -4.162545 |
| C  | -0.502006 | -0.721507 | -3.222472 |
| H  | -0.479233 | -0.544040 | -4.302710 |
| H  | -0.118355 | -1.727127 | -3.027223 |
| H  | 0.210486  | -0.042791 | -2.748659 |
| Cl | 1.063899  | -2.672506 | -0.938768 |

9-TS

|                                  |                     |         |         |
|----------------------------------|---------------------|---------|---------|
| B3LYP SCF energy:                | -2018.83531567 a.u. |         |         |
| B3LYP enthalpy:                  | -2018.059221 a.u.   |         |         |
| B3LYP free energy:               | -2018.181213 a.u.   |         |         |
| M06 SCF energy in solution:      | -2019.09371629 a.u. |         |         |
| M06 enthalpy in solution:        | -2018.317622 a.u.   |         |         |
| M06 free energy in solution:     | -2018.439614 a.u.   |         |         |
| Three lowest frequencies (cm-1): | -770.2587           | 16.2355 | 20.7148 |
| Imaginary frequency:             | -770.2587 cm-1      |         |         |

Cartesian coordinates

| ATOM | X         | Y         | Z         |
|------|-----------|-----------|-----------|
| Rh   | 1.556964  | -0.504708 | -0.632534 |
| C    | 0.980093  | -2.422750 | -1.199626 |
| H    | 1.377449  | -3.112351 | -0.440909 |
| H    | 1.403200  | -2.695448 | -2.174319 |
| H    | -0.099309 | -2.594146 | -1.262808 |
| N    | 2.606163  | 1.423560  | -0.019714 |
| C    | 4.193121  | 3.668151  | 0.503302  |
| C    | 2.075719  | 2.561197  | 0.455355  |
| C    | 3.953246  | 1.363774  | -0.203499 |
| C    | 4.759021  | 2.491191  | 0.030733  |
| C    | 2.819331  | 3.702641  | 0.738484  |

|   |           |           |           |
|---|-----------|-----------|-----------|
| H | 1.006120  | 2.555166  | 0.614557  |
| H | 5.824089  | 2.443438  | -0.163247 |
| H | 2.324053  | 4.589338  | 1.120693  |
| H | 4.814577  | 4.540570  | 0.686469  |
| C | 4.483835  | 0.060860  | -0.631829 |
| C | 5.447255  | -2.456881 | -1.376998 |
| C | 5.861186  | -0.217119 | -0.604174 |
| C | 3.554389  | -0.945759 | -1.016516 |
| C | 4.079035  | -2.193791 | -1.404717 |
| C | 6.346787  | -1.467091 | -0.972588 |
| H | 6.565103  | 0.537784  | -0.265884 |
| H | 2.484999  | -0.484888 | -1.939770 |
| H | 3.403524  | -2.977238 | -1.726588 |
| H | 7.414431  | -1.667029 | -0.943594 |
| H | 5.812805  | -3.438800 | -1.668871 |
| P | -0.954580 | -0.191390 | -0.033299 |
| C | -1.156097 | -1.650169 | 1.138680  |
| C | -0.233860 | -1.688302 | 2.225750  |
| C | -0.281548 | -2.733258 | 3.150050  |
| H | 0.422580  | -2.723313 | 3.979764  |
| C | -1.181617 | -3.792903 | 3.031023  |
| C | -2.004831 | -3.798171 | 1.909979  |
| H | -2.671474 | -4.643537 | 1.753415  |
| C | -2.005732 | -2.773304 | 0.948388  |
| C | 0.869619  | -0.671285 | 2.417384  |
| H | 0.542912  | 0.368241  | 2.341790  |
| H | 1.660246  | -0.816937 | 1.659214  |
| H | 1.343924  | -0.802071 | 3.395827  |
| C | -1.240312 | -4.892778 | 4.063409  |
| H | -0.236782 | -5.198452 | 4.380993  |
| H | -1.757816 | -5.777031 | 3.677520  |
| H | -1.776827 | -4.564309 | 4.963806  |
| C | -2.899252 | -3.031481 | -0.251640 |
| H | -2.407996 | -2.799721 | -1.197584 |
| H | -3.831178 | -2.460195 | -0.226514 |
| H | -3.170288 | -4.091563 | -0.272443 |
| C | -1.417858 | 1.430722  | 0.841129  |
| C | -1.867998 | 1.624328  | 2.179424  |
| C | -2.111320 | 2.927961  | 2.642672  |
| H | -2.458286 | 3.046789  | 3.667311  |
| C | -1.952182 | 4.063116  | 1.854148  |
| C | -1.536304 | 3.862702  | 0.539616  |
| H | -1.414505 | 4.722758  | -0.116060 |
| C | -1.263448 | 2.591493  | 0.020504  |
| C | -2.158291 | 0.544574  | 3.206766  |



|   |           |           |           |
|---|-----------|-----------|-----------|
| H | -1.263447 | 0.273274  | 3.777258  |
| H | -2.548268 | -0.375910 | 2.780425  |
| H | -2.893415 | 0.919828  | 3.925958  |
| C | -2.205299 | 5.448107  | 2.399993  |
| H | -1.279468 | 5.902242  | 2.778468  |
| H | -2.919110 | 5.427382  | 3.230275  |
| H | -2.601003 | 6.117118  | 1.627953  |
| C | -0.810017 | 2.559417  | -1.426033 |
| H | -0.474255 | 3.555221  | -1.732218 |
| H | -1.622821 | 2.261750  | -2.095890 |
| H | 0.018436  | 1.862878  | -1.591473 |
| C | -2.339236 | -0.210827 | -1.326629 |
| C | -3.702196 | 0.003891  | -0.957691 |
| C | -4.688000 | 0.090176  | -1.944789 |
| H | -5.719371 | 0.240465  | -1.631158 |
| C | -4.402558 | -0.015257 | -3.306268 |
| C | -3.075022 | -0.226990 | -3.656810 |
| H | -2.815245 | -0.320628 | -4.709213 |
| C | -2.039197 | -0.327297 | -2.712423 |
| C | -4.208350 | 0.121260  | 0.463885  |
| H | -4.076165 | 1.132501  | 0.860024  |
| H | -3.707416 | -0.565797 | 1.145957  |
| H | -5.278556 | -0.107369 | 0.495378  |
| C | -5.488269 | 0.113216  | -4.347380 |
| H | -5.168369 | -0.293426 | -5.312154 |
| H | -5.761290 | 1.164876  | -4.507380 |
| H | -6.400283 | -0.412402 | -4.041916 |
| C | -0.671177 | -0.573397 | -3.307337 |
| H | -0.614050 | -0.125180 | -4.305227 |
| H | -0.484064 | -1.647765 | -3.419838 |
| H | 0.148750  | -0.188118 | -2.698823 |

10

|                                  |                     |         |         |
|----------------------------------|---------------------|---------|---------|
| B3LYP SCF energy:                | -2439.19357910 a.u. |         |         |
| B3LYP enthalpy:                  | -2438.451288 a.u.   |         |         |
| B3LYP free energy:               | -2438.576660 a.u.   |         |         |
| M06 SCF energy in solution:      | -2439.47572273 a.u. |         |         |
| M06 enthalpy in solution:        | -2438.733432 a.u.   |         |         |
| M06 free energy in solution:     | -2438.858804 a.u.   |         |         |
| Three lowest frequencies (cm-1): | 12.7462             | 20.9599 | 24.6980 |

Cartesian coordinates

| ATOM | X | Y | Z |
|------|---|---|---|
|------|---|---|---|

|    |           |           |           |
|----|-----------|-----------|-----------|
| Rh | 1.874142  | -0.436061 | -0.587354 |
| N  | 2.598821  | 1.492303  | -0.202281 |
| C  | 3.785827  | 3.961236  | 0.286816  |
| C  | 1.854114  | 2.561203  | 0.122776  |
| C  | 3.957609  | 1.612329  | -0.268651 |
| C  | 4.563272  | 2.855189  | -0.032061 |
| C  | 2.400759  | 3.813287  | 0.376145  |
| H  | 0.788193  | 2.395499  | 0.187266  |
| H  | 5.641684  | 2.944645  | -0.093677 |
| H  | 1.747937  | 4.639824  | 0.634585  |
| H  | 4.254661  | 4.923960  | 0.470310  |
| C  | 4.656823  | 0.365586  | -0.567484 |
| C  | 5.841157  | -2.096447 | -1.103377 |
| C  | 6.056244  | 0.260116  | -0.650740 |
| C  | 3.836215  | -0.775302 | -0.748467 |
| C  | 4.449242  | -2.003851 | -1.025407 |
| C  | 6.648230  | -0.968685 | -0.918051 |
| H  | 6.685424  | 1.134603  | -0.505972 |
| H  | 2.006040  | -0.190450 | -2.084025 |
| H  | 3.836452  | -2.883703 | -1.179071 |
| H  | 7.729793  | -1.049132 | -0.983428 |
| H  | 6.299917  | -3.059381 | -1.316193 |
| P  | -1.172092 | -0.148520 | -0.028187 |
| C  | -1.209015 | -1.541429 | 1.227716  |
| C  | -0.252845 | -1.457137 | 2.277331  |
| C  | -0.186155 | -2.454386 | 3.252365  |
| H  | 0.544534  | -2.351783 | 4.052510  |
| C  | -1.004167 | -3.582475 | 3.217419  |
| C  | -1.865868 | -3.703634 | 2.130862  |
| H  | -2.469928 | -4.603759 | 2.039978  |
| C  | -1.977167 | -2.732749 | 1.123977  |
| C  | 0.781968  | -0.356325 | 2.389021  |
| H  | 0.423408  | 0.636932  | 2.114531  |
| H  | 1.658512  | -0.588227 | 1.758370  |
| H  | 1.170016  | -0.296550 | 3.411538  |
| C  | -0.945355 | -4.632460 | 4.300490  |
| H  | -1.265280 | -5.610850 | 3.926855  |
| H  | -1.602142 | -4.373760 | 5.142454  |
| H  | 0.068770  | -4.737582 | 4.701438  |
| C  | -2.869566 | -3.109427 | -0.042318 |
| H  | -2.347920 | -3.007464 | -0.996937 |
| H  | -3.782894 | -2.513772 | -0.105764 |
| H  | -3.168520 | -4.157281 | 0.057220  |
| C  | -1.683459 | 1.488537  | 0.776101  |
| C  | -2.087772 | 1.731227  | 2.120468  |

|    |           |           |           |
|----|-----------|-----------|-----------|
| C  | -2.320445 | 3.049579  | 2.543203  |
| H  | -2.625765 | 3.206551  | 3.576153  |
| C  | -2.198456 | 4.154433  | 1.704920  |
| C  | -1.830930 | 3.906387  | 0.383730  |
| H  | -1.741247 | 4.741618  | -0.308409 |
| C  | -1.577471 | 2.615783  | -0.096413 |
| C  | -2.336031 | 0.679924  | 3.186200  |
| H  | -1.424270 | 0.432990  | 3.740692  |
| H  | -2.723877 | -0.256495 | 2.791879  |
| H  | -3.057885 | 1.066286  | 3.913143  |
| C  | -2.494231 | 5.552040  | 2.194917  |
| H  | -2.209881 | 5.678106  | 3.245340  |
| H  | -3.566021 | 5.780031  | 2.120107  |
| H  | -1.961236 | 6.305522  | 1.605085  |
| C  | -1.217378 | 2.517036  | -1.566153 |
| H  | -0.921566 | 3.499628  | -1.947214 |
| H  | -2.066200 | 2.169831  | -2.164276 |
| H  | -0.392365 | 1.823479  | -1.755523 |
| C  | -2.569503 | -0.337718 | -1.275695 |
| C  | -3.937411 | -0.119293 | -0.948720 |
| C  | -4.903502 | -0.145962 | -1.960423 |
| H  | -5.944615 | 0.012099  | -1.685174 |
| C  | -4.584479 | -0.384435 | -3.297736 |
| C  | -3.246680 | -0.622035 | -3.601719 |
| H  | -2.967892 | -0.833409 | -4.631601 |
| C  | -2.234741 | -0.603172 | -2.630805 |
| C  | -4.456057 | 0.098329  | 0.455494  |
| H  | -4.319067 | 1.131327  | 0.789463  |
| H  | -3.958518 | -0.548121 | 1.181140  |
| H  | -5.527366 | -0.123309 | 0.496307  |
| C  | -5.648501 | -0.377921 | -4.369070 |
| H  | -5.315379 | -0.907506 | -5.267484 |
| H  | -5.903470 | 0.647760  | -4.667979 |
| H  | -6.573386 | -0.850014 | -4.018780 |
| C  | -0.832079 | -0.883157 | -3.114080 |
| H  | -0.841395 | -1.111665 | -4.184563 |
| H  | -0.366065 | -1.721743 | -2.590142 |
| H  | -0.167408 | -0.025267 | -2.965627 |
| Cl | 1.249194  | -2.704139 | -0.902960 |

11

B3LYP SCF energy: -2018.85087847 a.u.  
 B3LYP enthalpy: -2018.072550 a.u.

|                                  |                     |         |         |
|----------------------------------|---------------------|---------|---------|
| B3LYP free energy:               | -2018.195774 a.u.   |         |         |
| M06 SCF energy in solution:      | -2019.10308718 a.u. |         |         |
| M06 enthalpy in solution:        | -2018.324759 a.u.   |         |         |
| M06 free energy in solution:     | -2018.447983 a.u.   |         |         |
| Three lowest frequencies (cm-1): | 17.6455             | 22.9958 | 26.6043 |

Cartesian coordinates

| ATOM | X         | Y         | Z         |
|------|-----------|-----------|-----------|
| Rh   | -1.684104 | -0.534730 | 0.659603  |
| C    | -1.150635 | -2.479793 | 1.137355  |
| H    | -1.559807 | -3.132721 | 0.352378  |
| H    | -1.559632 | -2.803171 | 2.100985  |
| H    | -0.067636 | -2.642568 | 1.159317  |
| N    | -2.636917 | 1.457124  | 0.095550  |
| C    | -4.136273 | 3.764576  | -0.366197 |
| C    | -2.059162 | 2.588866  | -0.332599 |
| C    | -3.985757 | 1.430904  | 0.271081  |
| C    | -4.749311 | 2.592690  | 0.056493  |
| C    | -2.757966 | 3.765745  | -0.580537 |
| H    | -0.988888 | 2.546869  | -0.485576 |
| H    | -5.820185 | 2.574911  | 0.219775  |
| H    | -2.229547 | 4.648643  | -0.925034 |
| H    | -4.727360 | 4.661528  | -0.531544 |
| C    | -4.550083 | 0.130324  | 0.659186  |
| C    | -5.586935 | -2.373901 | 1.321706  |
| C    | -5.939701 | -0.061513 | 0.779039  |
| C    | -3.646474 | -0.947885 | 0.870573  |
| C    | -4.207900 | -2.191811 | 1.206706  |
| C    | -6.461966 | -1.305489 | 1.110453  |
| H    | -6.626746 | 0.761997  | 0.604848  |
| H    | -1.797949 | -0.321398 | 2.169189  |
| H    | -3.562266 | -3.043348 | 1.385972  |
| H    | -7.536508 | -1.441258 | 1.199739  |
| H    | -5.979588 | -3.354937 | 1.581533  |
| P    | 1.060379  | -0.184186 | 0.067439  |
| C    | 1.165275  | -1.660935 | -1.095115 |
| C    | 0.164012  | -1.715727 | -2.107238 |
| C    | 0.132493  | -2.778779 | -3.010920 |
| H    | -0.632281 | -2.779556 | -3.785309 |
| C    | 1.029190  | -3.845466 | -2.937011 |
| C    | 1.936783  | -3.832909 | -1.883250 |
| H    | 2.607888  | -4.680160 | -1.760459 |
| C    | 2.019708  | -2.786832 | -0.948499 |
| C    | -0.951468 | -0.697974 | -2.246903 |
| H    | -0.654020 | 0.337682  | -2.076930 |

|   |           |           |           |
|---|-----------|-----------|-----------|
| H | -1.784948 | -0.934253 | -1.559437 |
| H | -1.393051 | -0.752445 | -3.248056 |
| C | 0.997180  | -4.969279 | -3.944336 |
| H | -0.030651 | -5.276624 | -4.168905 |
| H | 1.541790  | -5.847103 | -3.582014 |
| H | 1.457210  | -4.664994 | -4.894141 |
| C | 2.996523  | -3.024035 | 0.188637  |
| H | 2.551612  | -2.827343 | 1.166266  |
| H | 3.898963  | -2.411700 | 0.119755  |
| H | 3.312709  | -4.071555 | 0.176214  |
| C | 1.462808  | 1.416440  | -0.861131 |
| C | 1.832558  | 1.590396  | -2.225118 |
| C | 2.042145  | 2.887557  | -2.720608 |
| H | 2.330895  | 2.993297  | -3.764583 |
| C | 1.919444  | 4.033694  | -1.940131 |
| C | 1.574278  | 3.852326  | -0.602104 |
| H | 1.480668  | 4.721812  | 0.045704  |
| C | 1.338831  | 2.587251  | -0.051616 |
| C | 2.062945  | 0.489121  | -3.243383 |
| H | 1.131743  | 0.184833  | -3.733589 |
| H | 2.502661  | -0.411994 | -2.821779 |
| H | 2.731864  | 0.855753  | -4.028505 |
| C | 2.135640  | 5.411109  | -2.520031 |
| H | 2.528086  | 6.105049  | -1.768824 |
| H | 1.195370  | 5.836987  | -2.895703 |
| H | 2.837986  | 5.386602  | -3.360038 |
| C | 0.958492  | 2.561984  | 1.415502  |
| H | 0.661973  | 3.563458  | 1.742282  |
| H | 1.794281  | 2.239992  | 2.044901  |
| H | 0.121507  | 1.884609  | 1.615503  |
| C | 2.519947  | -0.207292 | 1.269122  |
| C | 3.858317  | 0.041029  | 0.853503  |
| C | 4.879366  | 0.124563  | 1.807872  |
| H | 5.895584  | 0.302937  | 1.461519  |
| C | 4.646438  | -0.026089 | 3.173388  |
| C | 3.336449  | -0.285851 | 3.569235  |
| H | 3.122078  | -0.424542 | 4.626595  |
| C | 2.272956  | -0.376833 | 2.660247  |
| C | 4.301016  | 0.185180  | -0.585999 |
| H | 4.131605  | 1.196955  | -0.966632 |
| H | 3.780694  | -0.505451 | -1.250962 |
| H | 5.372714  | -0.023215 | -0.667705 |
| C | 5.763318  | 0.100069  | 4.181350  |
| H | 6.729424  | -0.177341 | 3.746226  |
| H | 5.587770  | -0.535410 | 5.055981  |

|   |          |           |          |
|---|----------|-----------|----------|
| H | 5.854173 | 1.133047  | 4.543528 |
| C | 0.914632 | -0.659576 | 3.259147 |
| H | 0.991280 | -0.714255 | 4.349565 |
| H | 0.491252 | -1.601809 | 2.905770 |
| H | 0.182026 | 0.112813  | 3.012444 |

12-TS

|                                  |                     |         |         |
|----------------------------------|---------------------|---------|---------|
| B3LYP SCF energy:                | -2439.15298066 a.u. |         |         |
| B3LYP enthalpy:                  | -2438.413728 a.u.   |         |         |
| B3LYP free energy:               | -2438.539131 a.u.   |         |         |
| M06 SCF energy in solution:      | -2439.43893927 a.u. |         |         |
| M06 enthalpy in solution:        | -2438.699687 a.u.   |         |         |
| M06 free energy in solution:     | -2438.825090 a.u.   |         |         |
| Three lowest frequencies (cm-1): | -151.7210           | 11.3225 | 20.1184 |
| Imaginary frequency:             | -151.7210 cm-1      |         |         |

Cartesian coordinates

| ATOM | X         | Y         | Z         |
|------|-----------|-----------|-----------|
| Rh   | 1.594342  | 0.075191  | -0.632356 |
| N    | 2.414489  | 1.924749  | -0.962813 |
| C    | 3.714096  | 4.355584  | -1.362056 |
| C    | 1.766398  | 2.972227  | -1.502675 |
| C    | 3.741279  | 2.046301  | -0.639123 |
| C    | 4.396943  | 3.271078  | -0.826795 |
| C    | 2.371610  | 4.203576  | -1.718157 |
| H    | 0.731194  | 2.798539  | -1.768857 |
| H    | 5.444950  | 3.357343  | -0.561994 |
| H    | 1.800248  | 5.015643  | -2.154620 |
| H    | 4.222584  | 5.303824  | -1.510643 |
| C    | 4.338982  | 0.811651  | -0.149578 |
| C    | 5.284376  | -1.680862 | 0.658473  |
| C    | 5.671927  | 0.672504  | 0.273814  |
| C    | 3.465396  | -0.302575 | -0.152381 |
| C    | 3.958103  | -1.552543 | 0.239995  |
| C    | 6.141099  | -0.571465 | 0.681810  |
| H    | 6.342605  | 1.528642  | 0.284524  |
| H    | 1.966412  | -0.607498 | -2.026267 |
| H    | 3.308768  | -2.422174 | 0.206368  |
| H    | 7.171112  | -0.683349 | 1.008852  |
| H    | 5.658908  | -2.655653 | 0.962995  |
| P    | -1.246115 | -0.007458 | 0.044249  |
| C    | -0.462981 | -1.456231 | 0.926491  |
| C    | 0.476681  | -1.121610 | 1.950412  |

|   |           |           |           |
|---|-----------|-----------|-----------|
| C | 1.159457  | -2.145541 | 2.620546  |
| H | 1.865570  | -1.868903 | 3.400631  |
| C | 0.975042  | -3.490724 | 2.315624  |
| C | 0.102063  | -3.796739 | 1.269230  |
| H | -0.021621 | -4.836848 | 0.976010  |
| C | -0.606764 | -2.824973 | 0.556132  |
| C | 0.774726  | 0.291867  | 2.427621  |
| H | 0.708751  | 1.044312  | 1.635476  |
| H | 1.789381  | 0.333570  | 2.834070  |
| H | 0.085261  | 0.611113  | 3.216991  |
| C | 1.694545  | -4.579318 | 3.075500  |
| H | 1.024381  | -5.071585 | 3.793122  |
| H | 2.543457  | -4.179391 | 3.639406  |
| H | 2.070621  | -5.357030 | 2.401256  |
| C | -1.443280 | -3.317814 | -0.604752 |
| H | -1.131699 | -2.850721 | -1.542275 |
| H | -2.511701 | -3.132465 | -0.474741 |
| H | -1.306258 | -4.396967 | -0.720225 |
| C | -2.157369 | 1.043269  | 1.314258  |
| C | -2.545469 | 0.678801  | 2.631197  |
| C | -3.150567 | 1.639492  | 3.460132  |
| H | -3.438941 | 1.334967  | 4.464958  |
| C | -3.409596 | 2.942854  | 3.052225  |
| C | -3.055042 | 3.281095  | 1.744479  |
| H | -3.261367 | 4.285900  | 1.380858  |
| C | -2.438894 | 2.373696  | 0.881405  |
| C | -2.397807 | -0.687639 | 3.278699  |
| H | -1.599605 | -0.682977 | 4.031193  |
| H | -2.172268 | -1.488662 | 2.583081  |
| H | -3.325373 | -0.943574 | 3.803219  |
| C | -4.040410 | 3.954978  | 3.978218  |
| H | -4.492158 | 3.473080  | 4.851210  |
| H | -4.819779 | 4.533529  | 3.468701  |
| H | -3.296184 | 4.673475  | 4.346759  |
| C | -2.106240 | 2.873976  | -0.506961 |
| H | -2.405063 | 3.921145  | -0.615573 |
| H | -2.615295 | 2.300017  | -1.288259 |
| H | -1.032057 | 2.809846  | -0.704086 |
| C | -2.604553 | -0.462654 | -1.167793 |
| C | -3.890584 | -0.948359 | -0.798559 |
| C | -4.866860 | -1.140412 | -1.781351 |
| H | -5.838183 | -1.525165 | -1.477043 |
| C | -4.639836 | -0.865870 | -3.130254 |
| C | -3.379394 | -0.391596 | -3.481893 |
| H | -3.167637 | -0.178624 | -4.527221 |

|    |           |           |           |
|----|-----------|-----------|-----------|
| C  | -2.360194 | -0.181564 | -2.541924 |
| C  | -4.288756 | -1.312343 | 0.612587  |
| H  | -4.431905 | -0.426102 | 1.238054  |
| H  | -3.540994 | -1.939121 | 1.103183  |
| H  | -5.230400 | -1.869824 | 0.605681  |
| C  | -5.726143 | -1.056298 | -4.161293 |
| H  | -5.306912 | -1.215795 | -5.160055 |
| H  | -6.377880 | -0.173832 | -4.216607 |
| H  | -6.363375 | -1.913532 | -3.917863 |
| C  | -1.043324 | 0.320088  | -3.094049 |
| H  | -1.162371 | 0.603322  | -4.144796 |
| H  | -0.265072 | -0.448500 | -3.045584 |
| H  | -0.671097 | 1.193281  | -2.551987 |
| Cl | 1.563761  | -2.239629 | -2.427733 |

13-TS

|                                  |                     |        |        |
|----------------------------------|---------------------|--------|--------|
| B3LYP SCF energy:                | -2018.84316967 a.u. |        |        |
| B3LYP enthalpy:                  | -2018.068120 a.u.   |        |        |
| B3LYP free energy:               | -2018.201725 a.u.   |        |        |
| M06 SCF energy in solution:      | -2019.08444574 a.u. |        |        |
| M06 enthalpy in solution:        | -2018.309396 a.u.   |        |        |
| M06 free energy in solution:     | -2018.443001 a.u.   |        |        |
| Three lowest frequencies (cm-1): | -812.1291           | 8.3637 | 9.3740 |
| Imaginary frequency:             | -812.1291 cm-1      |        |        |

Cartesian coordinates

| ATOM | X        | Y         | Z         |
|------|----------|-----------|-----------|
| Rh   | 3.354498 | -1.434118 | 0.520824  |
| C    | 2.901730 | -2.911318 | 1.991590  |
| H    | 1.963047 | -3.388233 | 1.680801  |
| H    | 2.709526 | -2.192026 | 2.798452  |
| H    | 3.561152 | -3.690126 | 2.389227  |
| N    | 3.558212 | 0.282150  | -0.729264 |
| C    | 4.027170 | 2.616366  | -2.155450 |
| C    | 2.682310 | 0.704487  | -1.654233 |
| C    | 4.688033 | 1.003065  | -0.480529 |
| C    | 4.936665 | 2.183151  | -1.196926 |
| C    | 2.872740 | 1.867316  | -2.393815 |
| H    | 1.806809 | 0.079962  | -1.804068 |
| H    | 5.835983 | 2.756306  | -1.001179 |
| H    | 2.134572 | 2.167149  | -3.129601 |
| H    | 4.217138 | 3.530473  | -2.711459 |
| C    | 5.549411 | 0.424613  | 0.553893  |



|   |           |           |           |
|---|-----------|-----------|-----------|
| C | 7.095689  | -0.788276 | 2.535727  |
| C | 6.768562  | 0.997320  | 0.952176  |
| C | 5.086223  | -0.779571 | 1.156871  |
| C | 5.885253  | -1.367981 | 2.149754  |
| C | 7.542404  | 0.395765  | 1.939440  |
| H | 7.118851  | 1.917223  | 0.490445  |
| H | 3.823914  | -2.925822 | 0.702759  |
| H | 5.563035  | -2.287135 | 2.628696  |
| H | 8.485033  | 0.843150  | 2.241943  |
| H | 7.696470  | -1.265470 | 3.306970  |
| P | -2.281274 | -0.042148 | 0.333273  |
| C | -3.843440 | -1.032268 | 0.497939  |
| C | -4.221801 | -1.293670 | 1.846042  |
| C | -5.312790 | -2.125838 | 2.114235  |
| H | -5.591906 | -2.301016 | 3.151459  |
| C | -6.043707 | -2.743415 | 1.097995  |
| C | -5.665860 | -2.477720 | -0.217852 |
| H | -6.234335 | -2.928559 | -1.029185 |
| C | -4.594232 | -1.635456 | -0.545094 |
| C | -3.497580 | -0.682165 | 3.027775  |
| H | -3.926345 | -1.044438 | 3.967419  |
| H | -3.565313 | 0.412287  | 3.032083  |
| H | -2.429746 | -0.929385 | 3.018368  |
| C | -7.188803 | -3.676971 | 1.411683  |
| H | -6.833569 | -4.706108 | 1.558139  |
| H | -7.921853 | -3.699663 | 0.598145  |
| H | -7.708368 | -3.381088 | 2.329654  |
| C | -4.342603 | -1.407877 | -2.020816 |
| H | -3.447923 | -1.927744 | -2.378581 |
| H | -4.205570 | -0.349535 | -2.259618 |
| H | -5.193388 | -1.773947 | -2.604479 |
| C | -2.639183 | 1.759397  | 0.610296  |
| C | -3.909163 | 2.393010  | 0.605425  |
| C | -4.004564 | 3.737937  | 0.989854  |
| H | -4.984946 | 4.210417  | 0.976116  |
| C | -2.897337 | 4.495649  | 1.369167  |
| C | -1.650978 | 3.866857  | 1.352587  |
| H | -0.765354 | 4.433828  | 1.633198  |
| C | -1.500609 | 2.523029  | 0.998156  |
| C | -5.195381 | 1.720834  | 0.175493  |
| H | -5.556199 | 0.996856  | 0.913003  |
| H | -5.081995 | 1.176853  | -0.766300 |
| H | -5.979804 | 2.471367  | 0.034916  |
| C | -3.040931 | 5.936050  | 1.800268  |
| H | -3.085511 | 6.020606  | 2.894548  |

|   |           |           |           |
|---|-----------|-----------|-----------|
| H | -3.956971 | 6.384796  | 1.401640  |
| H | -2.191668 | 6.542165  | 1.465339  |
| C | -0.101866 | 1.942727  | 1.025617  |
| H | 0.613676  | 2.683270  | 1.396379  |
| H | 0.235606  | 1.629094  | 0.030643  |
| H | -0.043806 | 1.057020  | 1.668579  |
| C | -1.544010 | -0.310369 | -1.350923 |
| C | -1.497147 | 0.612093  | -2.427363 |
| C | -0.766721 | 0.286032  | -3.580763 |
| H | -0.755505 | 1.000105  | -4.402480 |
| C | -0.085514 | -0.921890 | -3.728646 |
| C | -0.149483 | -1.829091 | -2.666995 |
| H | 0.358644  | -2.787443 | -2.755739 |
| C | -0.846926 | -1.547152 | -1.487894 |
| C | -2.224085 | 1.939719  | -2.441307 |
| H | -1.751901 | 2.682896  | -1.790240 |
| H | -3.259668 | 1.845377  | -2.104513 |
| H | -2.237421 | 2.347719  | -3.457198 |
| C | 0.703114  | -1.236125 | -4.978092 |
| H | 0.562954  | -2.277589 | -5.289014 |
| H | 1.779839  | -1.092042 | -4.816188 |
| H | 0.406721  | -0.590608 | -5.811509 |
| C | -0.849489 | -2.605794 | -0.404175 |
| H | -0.216452 | -3.450720 | -0.693376 |
| H | -1.856094 | -2.995179 | -0.211358 |
| H | -0.482739 | -2.207412 | 0.549163  |

14

|                                  |                     |         |         |
|----------------------------------|---------------------|---------|---------|
| B3LYP SCF energy:                | -1978.37231334 a.u. |         |         |
| B3LYP enthalpy:                  | -1977.642888 a.u.   |         |         |
| B3LYP free energy:               | -1977.759310 a.u.   |         |         |
| M06 SCF energy in solution:      | -1978.64913797 a.u. |         |         |
| M06 enthalpy in solution:        | -1977.919713 a.u.   |         |         |
| M06 free energy in solution:     | -1978.036135 a.u.   |         |         |
| Three lowest frequencies (cm-1): | 16.7236             | 27.2580 | 29.0442 |

Cartesian coordinates

| ATOM | X        | Y        | Z         |
|------|----------|----------|-----------|
| C    | 3.916347 | 0.853644 | -0.054029 |
| C    | 2.968972 | 3.427493 | 0.399659  |
| C    | 2.504141 | 1.042735 | 0.051603  |
| C    | 4.813688 | 1.929773 | 0.058288  |
| C    | 4.346808 | 3.219316 | 0.283197  |

|    |           |           |           |
|----|-----------|-----------|-----------|
| C  | 2.074658  | 2.361409  | 0.287298  |
| H  | 5.884663  | 1.763032  | -0.030277 |
| H  | 5.043638  | 4.048740  | 0.369067  |
| H  | 1.016805  | 2.571954  | 0.381300  |
| H  | 2.585726  | 4.430154  | 0.579468  |
| C  | 4.362608  | -0.519751 | -0.270732 |
| C  | 4.924432  | -3.212290 | -0.633531 |
| C  | 5.694066  | -0.953067 | -0.370323 |
| N  | 3.341982  | -1.421097 | -0.363495 |
| C  | 3.627767  | -2.724072 | -0.533257 |
| C  | 5.979648  | -2.299994 | -0.554119 |
| H  | 6.499981  | -0.231472 | -0.298974 |
| H  | 2.774089  | -3.391823 | -0.589260 |
| H  | 7.010153  | -2.635655 | -0.630849 |
| H  | 5.096095  | -4.274831 | -0.770495 |
| Rh | 1.414199  | -0.614699 | -0.196298 |
| P  | -0.902818 | 0.035056  | 0.053268  |
| C  | -1.377513 | 1.822899  | -0.202927 |
| C  | -0.867323 | 2.426525  | -1.391981 |
| C  | -1.067455 | 3.793841  | -1.610821 |
| H  | -0.671682 | 4.232281  | -2.524523 |
| C  | -1.747282 | 4.607026  | -0.704596 |
| C  | -2.269974 | 3.996396  | 0.433514  |
| H  | -2.837711 | 4.599183  | 1.139324  |
| C  | -2.115922 | 2.629056  | 0.704614  |
| C  | -0.140190 | 1.662552  | -2.476075 |
| H  | 0.251647  | 2.355218  | -3.227239 |
| H  | -0.803741 | 0.954999  | -2.986674 |
| H  | 0.697111  | 1.075489  | -2.074430 |
| C  | -1.905785 | 6.089133  | -0.945848 |
| H  | -2.049544 | 6.309745  | -2.009462 |
| H  | -1.013548 | 6.640410  | -0.619799 |
| H  | -2.760151 | 6.496333  | -0.394805 |
| C  | -2.826486 | 2.125913  | 1.945803  |
| H  | -2.139485 | 1.861493  | 2.754484  |
| H  | -3.433346 | 1.238347  | 1.748588  |
| H  | -3.493732 | 2.906236  | 2.324897  |
| C  | -1.836122 | -0.939416 | -1.261401 |
| C  | -2.991343 | -0.519722 | -1.973134 |
| C  | -3.529632 | -1.362043 | -2.957725 |
| H  | -4.411822 | -1.022181 | -3.496419 |
| C  | -3.003680 | -2.617277 | -3.257529 |
| C  | -1.891693 | -3.034109 | -2.525446 |
| H  | -1.463343 | -4.016063 | -2.717214 |
| C  | -1.300218 | -2.219394 | -1.556916 |

|   |           |           |           |
|---|-----------|-----------|-----------|
| C | -3.749374 | 0.772423  | -1.740108 |
| H | -3.248049 | 1.636808  | -2.186523 |
| H | -3.879780 | 1.001201  | -0.680538 |
| H | -4.744544 | 0.698836  | -2.190253 |
| C | -3.603288 | -3.484202 | -4.338433 |
| H | -3.517057 | -4.548556 | -4.093403 |
| H | -3.091388 | -3.330267 | -5.297926 |
| H | -4.662731 | -3.255195 | -4.494785 |
| C | -0.062502 | -2.747089 | -0.873674 |
| H | 0.111071  | -3.801078 | -1.114264 |
| H | -0.091775 | -2.664594 | 0.219977  |
| H | 0.827991  | -2.207279 | -1.283979 |
| C | -1.504539 | -0.619892 | 1.725136  |
| C | -2.618481 | -1.483878 | 1.931884  |
| C | -2.816951 | -2.058469 | 3.197315  |
| H | -3.670940 | -2.719412 | 3.330075  |
| C | -1.992254 | -1.803044 | 4.288726  |
| C | -0.949382 | -0.899605 | 4.093938  |
| H | -0.310184 | -0.636197 | 4.934098  |
| C | -0.686565 | -0.310766 | 2.853206  |
| C | -3.694448 | -1.820105 | 0.916284  |
| H | -3.356460 | -2.516374 | 0.144274  |
| H | -4.075107 | -0.933110 | 0.406489  |
| H | -4.540901 | -2.285871 | 1.430543  |
| C | -2.220567 | -2.467230 | 5.624985  |
| H | -1.998184 | -1.786735 | 6.454564  |
| H | -1.572236 | -3.345570 | 5.745985  |
| H | -3.255655 | -2.808609 | 5.732281  |
| C | 0.468474  | 0.658526  | 2.806873  |
| H | 0.833295  | 0.863894  | 3.818441  |
| H | 0.199934  | 1.616134  | 2.350765  |
| H | 1.294510  | 0.254215  | 2.208029  |

15

|                                  |                                   |
|----------------------------------|-----------------------------------|
| B3LYP SCF energy:                | -2018.85529395 a.u.               |
| B3LYP enthalpy:                  | -2018.076812 a.u.                 |
| B3LYP free energy:               | -2018.200002 a.u.                 |
| M06 SCF energy in solution:      | -2019.10488786 a.u.               |
| M06 enthalpy in solution:        | -2018.326406 a.u.                 |
| M06 free energy in solution:     | -2018.449596 a.u.                 |
| Three lowest frequencies (cm-1): | 19.2513      20.5355      28.5205 |

Cartesian coordinates

| ATOM | X         | Y         | Z         |
|------|-----------|-----------|-----------|
| Rh   | 1.621197  | -0.518364 | 0.210285  |
| C    | 2.020868  | -0.788615 | 2.209236  |
| H    | 2.452306  | 0.137740  | 2.605983  |
| H    | 2.721079  | -1.611563 | 2.369748  |
| H    | 1.080147  | -1.018447 | 2.714769  |
| N    | 2.633995  | 1.494668  | 0.216834  |
| C    | 4.254572  | 3.747334  | 0.427889  |
| C    | 2.111802  | 2.696772  | 0.502662  |
| C    | 3.978234  | 1.371823  | 0.043556  |
| C    | 4.805611  | 2.504541  | 0.142709  |
| C    | 2.875550  | 3.853648  | 0.618566  |
| H    | 1.034581  | 2.725190  | 0.636124  |
| H    | 5.877293  | 2.404993  | 0.015316  |
| H    | 2.401110  | 4.801135  | 0.851984  |
| H    | 4.894580  | 4.621857  | 0.509452  |
| C    | 4.462262  | 0.004613  | -0.209065 |
| C    | 5.327470  | -2.623551 | -0.602607 |
| C    | 5.802603  | -0.263696 | -0.543770 |
| C    | 3.522419  | -1.056332 | -0.090027 |
| C    | 3.994134  | -2.367139 | -0.275696 |
| C    | 6.236141  | -1.569910 | -0.743798 |
| H    | 6.515783  | 0.548631  | -0.659234 |
| H    | 1.164267  | -2.024635 | 0.303188  |
| H    | 3.306441  | -3.199644 | -0.161347 |
| H    | 7.272867  | -1.765963 | -1.004051 |
| H    | 5.660943  | -3.649397 | -0.745933 |
| P    | -1.005071 | -0.125724 | -0.019836 |
| C    | -1.546429 | -1.043022 | 1.508803  |
| C    | -1.373382 | -0.364270 | 2.750291  |
| C    | -1.722690 | -1.008658 | 3.941531  |
| H    | -1.593888 | -0.468198 | 4.877398  |
| C    | -2.202000 | -2.317947 | 3.972784  |
| C    | -2.249841 | -3.005370 | 2.761141  |
| H    | -2.540428 | -4.054047 | 2.761694  |
| C    | -1.907364 | -2.416042 | 1.536086  |
| C    | -0.780243 | 1.025905  | 2.877284  |
| H    | 0.106943  | 1.138047  | 2.246958  |
| H    | -0.471178 | 1.200459  | 3.912502  |
| H    | -1.475389 | 1.822823  | 2.600218  |
| C    | -2.621587 | -2.971837 | 5.267489  |
| H    | -2.035618 | -2.597619 | 6.114187  |
| H    | -2.500263 | -4.059547 | 5.225182  |
| H    | -3.678410 | -2.770816 | 5.490856  |
| C    | -1.861827 | -3.341624 | 0.336619  |

|   |           |           |           |
|---|-----------|-----------|-----------|
| H | -0.919540 | -3.234066 | -0.208819 |
| H | -2.672069 | -3.176767 | -0.378364 |
| H | -1.931374 | -4.379798 | 0.676167  |
| C | -1.961888 | 1.520393  | -0.103382 |
| C | -3.099137 | 1.918542  | 0.656833  |
| C | -3.607852 | 3.221315  | 0.509719  |
| H | -4.476601 | 3.495661  | 1.106004  |
| C | -3.067404 | 4.161477  | -0.358302 |
| C | -1.985324 | 3.748777  | -1.135139 |
| H | -1.555211 | 4.440992  | -1.856250 |
| C | -1.433768 | 2.468384  | -1.035611 |
| C | -3.892744 | 1.084924  | 1.652197  |
| H | -3.675377 | 1.390119  | 2.682642  |
| H | -3.713668 | 0.018545  | 1.594083  |
| H | -4.962724 | 1.257784  | 1.490334  |
| C | -3.621447 | 5.562319  | -0.459218 |
| H | -3.645475 | 5.910523  | -1.498138 |
| H | -3.004923 | 6.274964  | 0.105020  |
| H | -4.638463 | 5.620748  | -0.057860 |
| C | -0.309193 | 2.162556  | -2.001004 |
| H | -0.010397 | 3.071265  | -2.532365 |
| H | -0.617765 | 1.427409  | -2.751733 |
| H | 0.577169  | 1.766207  | -1.501350 |
| C | -1.605067 | -0.931856 | -1.622515 |
| C | -2.980461 | -1.147873 | -1.929472 |
| C | -3.346581 | -1.668753 | -3.173256 |
| H | -4.403711 | -1.832951 | -3.372999 |
| C | -2.412943 | -1.980580 | -4.163010 |
| C | -1.075248 | -1.752017 | -3.864300 |
| H | -0.321146 | -1.978335 | -4.614948 |
| C | -0.648526 | -1.243372 | -2.626422 |
| C | -4.113685 | -0.861198 | -0.974206 |
| H | -4.287491 | 0.213965  | -0.872906 |
| H | -3.921592 | -1.259789 | 0.023722  |
| H | -5.040290 | -1.314238 | -1.339861 |
| C | -2.844799 | -2.544168 | -5.495341 |
| H | -3.295716 | -3.537988 | -5.378822 |
| H | -1.998135 | -2.641493 | -6.182070 |
| H | -3.596823 | -1.905496 | -5.974510 |
| C | 0.852032  | -1.099491 | -2.490421 |
| H | 1.321913  | -1.034405 | -3.477770 |
| H | 1.292150  | -1.958164 | -1.976197 |
| H | 1.154719  | -0.182120 | -1.964116 |

16-TS

|                                  |                     |         |         |
|----------------------------------|---------------------|---------|---------|
| B3LYP SCF energy:                | -2018.82189816 a.u. |         |         |
| B3LYP enthalpy:                  | -2018.045400 a.u.   |         |         |
| B3LYP free energy:               | -2018.167916 a.u.   |         |         |
| M06 SCF energy in solution:      | -2019.08386021 a.u. |         |         |
| M06 enthalpy in solution:        | -2018.307362 a.u.   |         |         |
| M06 free energy in solution:     | -2018.429878 a.u.   |         |         |
| Three lowest frequencies (cm-1): | -437.4638           | 17.1346 | 21.4239 |
| Imaginary frequency:             | -437.4638 cm-1      |         |         |

Cartesian coordinates

| ATOM | X         | Y         | Z         |
|------|-----------|-----------|-----------|
| Rh   | -1.115802 | -0.331475 | -1.317732 |
| C    | -2.601225 | -0.501068 | -2.978593 |
| H    | -3.578128 | -0.016641 | -2.975222 |
| H    | -2.593373 | -1.358529 | -3.647049 |
| H    | -1.865972 | 0.229407  | -3.361432 |
| N    | -2.584914 | 1.144343  | -0.462431 |
| C    | -4.716460 | 2.685628  | 0.461094  |
| C    | -2.451070 | 2.465668  | -0.274008 |
| C    | -3.783972 | 0.554307  | -0.201812 |
| C    | -4.868633 | 1.319590  | 0.263511  |
| C    | -3.481813 | 3.279129  | 0.184946  |
| H    | -1.470595 | 2.876538  | -0.489996 |
| H    | -5.825694 | 0.842338  | 0.443169  |
| H    | -3.317338 | 4.343002  | 0.320840  |
| H    | -5.552116 | 3.283728  | 0.814693  |
| C    | -3.843486 | -0.885277 | -0.467157 |
| C    | -3.875011 | -3.635190 | -0.979521 |
| C    | -4.812328 | -1.713946 | 0.124992  |
| C    | -2.845168 | -1.438751 | -1.333392 |
| C    | -2.913730 | -2.832763 | -1.580081 |
| C    | -4.835765 | -3.081535 | -0.119984 |
| H    | -5.534390 | -1.284794 | 0.815660  |
| H    | -0.268896 | -1.453801 | -2.041762 |
| H    | -2.187499 | -3.275002 | -2.255174 |
| H    | -5.586071 | -3.710528 | 0.350269  |
| H    | -3.881336 | -4.704096 | -1.181764 |
| P    | 0.923887  | -0.096077 | -0.011377 |
| C    | 2.204013  | 0.114859  | -1.379646 |
| C    | 2.006065  | 1.186611  | -2.300464 |
| C    | 2.896638  | 1.373434  | -3.359959 |
| H    | 2.728214  | 2.210091  | -4.035059 |
| C    | 3.973631  | 0.517633  | -3.591474 |

|   |           |           |           |
|---|-----------|-----------|-----------|
| C | 4.098276  | -0.579945 | -2.746283 |
| H | 4.889358  | -1.301855 | -2.937573 |
| C | 3.235944  | -0.820830 | -1.664213 |
| C | 0.827747  | 2.131040  | -2.241636 |
| H | 0.733112  | 2.657999  | -1.289944 |
| H | -0.111496 | 1.573635  | -2.390739 |
| H | 0.899003  | 2.881477  | -3.035652 |
| C | 4.945436  | 0.764018  | -4.720126 |
| H | 5.503871  | -0.143266 | -4.972710 |
| H | 5.678604  | 1.536933  | -4.452418 |
| H | 4.430986  | 1.108575  | -5.624520 |
| C | 3.467555  | -2.136375 | -0.944441 |
| H | 2.544777  | -2.709990 | -0.830717 |
| H | 3.896379  | -2.017403 | 0.053679  |
| H | 4.162776  | -2.747012 | -1.528866 |
| C | 0.843372  | 1.429271  | 1.122698  |
| C | 1.632537  | 2.610473  | 1.079980  |
| C | 1.315250  | 3.688661  | 1.925908  |
| H | 1.935712  | 4.581444  | 1.863797  |
| C | 0.272961  | 3.654986  | 2.842755  |
| C | -0.457529 | 2.468234  | 2.921955  |
| H | -1.259304 | 2.387640  | 3.653275  |
| C | -0.200966 | 1.366882  | 2.101566  |
| C | 2.872626  | 2.859532  | 0.235962  |
| H | 2.684306  | 3.622490  | -0.529433 |
| H | 3.252988  | 1.981344  | -0.272496 |
| H | 3.671182  | 3.247902  | 0.878684  |
| C | -0.054298 | 4.838567  | 3.721529  |
| H | -0.178043 | 4.538352  | 4.768847  |
| H | -0.993585 | 5.316354  | 3.412821  |
| H | 0.732319  | 5.598940  | 3.678782  |
| C | -1.046929 | 0.139100  | 2.365835  |
| H | -1.913675 | 0.406175  | 2.978312  |
| H | -0.477655 | -0.623015 | 2.909278  |
| H | -1.415610 | -0.322308 | 1.446277  |
| C | 1.547629  | -1.367905 | 1.243656  |
| C | 2.650228  | -1.085818 | 2.099470  |
| C | 2.988629  | -1.984049 | 3.118924  |
| H | 3.839365  | -1.745592 | 3.754329  |
| C | 2.292043  | -3.170616 | 3.337478  |
| C | 1.250704  | -3.463011 | 2.460770  |
| H | 0.710294  | -4.399804 | 2.576677  |
| C | 0.866344  | -2.603750 | 1.421702  |
| C | 3.563381  | 0.112232  | 1.964152  |
| H | 3.142052  | 1.005608  | 2.434229  |



|   |           |           |           |
|---|-----------|-----------|-----------|
| H | 3.771706  | 0.354636  | 0.921018  |
| H | 4.521432  | -0.096678 | 2.450760  |
| C | 2.651873  | -4.098505 | 4.472579  |
| H | 3.717814  | -4.038587 | 4.717838  |
| H | 2.415416  | -5.140001 | 4.229661  |
| H | 2.094192  | -3.842571 | 5.383655  |
| C | -0.254742 | -3.097398 | 0.541838  |
| H | -0.583027 | -4.088299 | 0.871421  |
| H | 0.044516  | -3.166295 | -0.507342 |
| H | -1.117954 | -2.430124 | 0.554463  |

17

|                                  |                     |         |         |
|----------------------------------|---------------------|---------|---------|
| B3LYP SCF energy:                | -1979.54872839 a.u. |         |         |
| B3LYP enthalpy:                  | -1978.799720 a.u.   |         |         |
| B3LYP free energy:               | -1978.921353 a.u.   |         |         |
| M06 SCF energy in solution:      | -1979.82765591 a.u. |         |         |
| M06 enthalpy in solution:        | -1979.078648 a.u.   |         |         |
| M06 free energy in solution:     | -1979.200281 a.u.   |         |         |
| Three lowest frequencies (cm-1): | 14.5771             | 17.8286 | 29.7555 |

Cartesian coordinates

| ATOM | X        | Y         | Z         |
|------|----------|-----------|-----------|
| Rh   | 1.403614 | -0.456652 | -0.662165 |
| N    | 2.688324 | 1.442919  | -0.388923 |
| C    | 5.019262 | 2.646597  | 0.552912  |
| C    | 2.667555 | 2.700026  | 0.073506  |
| C    | 3.864067 | 0.771505  | -0.408937 |
| C    | 5.049905 | 1.340517  | 0.063314  |
| C    | 3.810206 | 3.341886  | 0.553296  |
| H    | 1.699190 | 3.190770  | 0.077813  |
| H    | 5.973000 | 0.770723  | 0.029308  |
| H    | 3.744661 | 4.359937  | 0.924200  |
| H    | 5.927622 | 3.116027  | 0.920917  |
| C    | 3.736949 | -0.610576 | -0.936548 |
| C    | 3.800281 | -3.156040 | -2.152131 |
| C    | 4.395692 | -1.702876 | -0.306812 |
| C    | 3.097882 | -0.822722 | -2.197317 |
| C    | 3.155214 | -2.112619 | -2.787355 |
| C    | 4.421726 | -2.949292 | -0.901441 |
| H    | 4.876822 | -1.542605 | 0.654868  |
| H    | 2.702448 | -2.261146 | -3.764120 |
| H    | 4.921561 | -3.775543 | -0.403063 |
| H    | 3.835815 | -4.138037 | -2.616215 |

|   |           |           |           |
|---|-----------|-----------|-----------|
| P | -0.805848 | -0.188033 | 0.054573  |
| C | -1.002608 | -1.425322 | 1.457602  |
| C | -0.083157 | -1.313765 | 2.543248  |
| C | -0.151340 | -2.215326 | 3.608700  |
| H | 0.550785  | -2.096288 | 4.431610  |
| C | -1.065564 | -3.267804 | 3.642799  |
| C | -1.885670 | -3.427641 | 2.529660  |
| H | -2.563849 | -4.277806 | 2.494507  |
| C | -1.867133 | -2.553938 | 1.431076  |
| C | 1.040194  | -0.304867 | 2.585394  |
| H | 0.716115  | 0.731495  | 2.463566  |
| H | 1.738281  | -0.507632 | 1.755265  |
| H | 1.585751  | -0.379999 | 3.532292  |
| C | -1.147634 | -4.201566 | 4.826450  |
| H | -0.161385 | -4.369351 | 5.273823  |
| H | -1.561161 | -5.175079 | 4.541853  |
| H | -1.793888 | -3.790966 | 5.614466  |
| C | -2.745893 | -2.968606 | 0.265900  |
| H | -2.200082 | -2.965838 | -0.680878 |
| H | -3.622292 | -2.329798 | 0.131719  |
| H | -3.107078 | -3.988180 | 0.433247  |
| C | -1.121229 | 1.588871  | 0.658362  |
| C | -1.502723 | 2.025752  | 1.957254  |
| C | -1.569428 | 3.402596  | 2.236115  |
| H | -1.861168 | 3.703395  | 3.241024  |
| C | -1.305074 | 4.385410  | 1.290966  |
| C | -0.985150 | 3.949824  | 0.004263  |
| H | -0.810919 | 4.688219  | -0.776480 |
| C | -0.888112 | 2.595744  | -0.333903 |
| C | -1.903667 | 1.153872  | 3.135517  |
| H | -1.081428 | 1.048008  | 3.853062  |
| H | -2.213981 | 0.151255  | 2.861939  |
| H | -2.732917 | 1.631460  | 3.668944  |
| C | -1.365390 | 5.855208  | 1.632349  |
| H | -1.868567 | 6.429973  | 0.846071  |
| H | -0.359034 | 6.280368  | 1.746331  |
| H | -1.900726 | 6.025986  | 2.572111  |
| C | -0.568702 | 2.307513  | -1.787019 |
| H | -0.229805 | 3.222478  | -2.283829 |
| H | -1.449520 | 1.943718  | -2.326255 |
| H | 0.213646  | 1.547549  | -1.895543 |
| C | -2.254726 | -0.348344 | -1.157838 |
| C | -3.571671 | 0.062398  | -0.800055 |
| C | -4.581424 | 0.099093  | -1.768662 |
| H | -5.578305 | 0.410748  | -1.462497 |

|   |           |           |           |
|---|-----------|-----------|-----------|
| C | -4.361914 | -0.259582 | -3.097125 |
| C | -3.087553 | -0.711434 | -3.426267 |
| H | -2.892082 | -1.038505 | -4.445206 |
| C | -2.036674 | -0.776623 | -2.498603 |
| C | -4.014344 | 0.417824  | 0.602895  |
| H | -3.785561 | 1.456485  | 0.858724  |
| H | -3.547269 | -0.217463 | 1.356602  |
| H | -5.097914 | 0.288102  | 0.690959  |
| C | -5.458634 | -0.162388 | -4.130029 |
| H | -6.440286 | -0.380587 | -3.694890 |
| H | -5.291531 | -0.857305 | -4.959804 |
| H | -5.511805 | 0.848468  | -4.556633 |
| C | -0.744947 | -1.354122 | -3.027418 |
| H | -0.792306 | -1.441974 | -4.118341 |
| H | -0.552972 | -2.351304 | -2.615883 |
| H | 0.129406  | -0.756765 | -2.746416 |
| H | 2.824169  | 0.027137  | -2.816191 |
| H | 0.943965  | -1.955827 | -0.716411 |

18

|                                  |                     |         |         |
|----------------------------------|---------------------|---------|---------|
| B3LYP SCF energy:                | -2166.95382248 a.u. |         |         |
| B3LYP enthalpy:                  | -2166.207009 a.u.   |         |         |
| B3LYP free energy:               | -2166.331613 a.u.   |         |         |
| M06 SCF energy in solution:      | -2167.21278277 a.u. |         |         |
| M06 enthalpy in solution:        | -2166.465969 a.u.   |         |         |
| M06 free energy in solution:     | -2166.590573 a.u.   |         |         |
| Three lowest frequencies (cm-1): | 23.3349             | 26.3142 | 28.8446 |

Cartesian coordinates

| ATOM | X        | Y         | Z         |
|------|----------|-----------|-----------|
| C    | 3.765519 | 1.362760  | 0.177038  |
| C    | 2.531822 | 3.460837  | 1.524028  |
| C    | 2.356251 | 1.295157  | 0.392398  |
| C    | 4.522284 | 2.455078  | 0.632797  |
| C    | 3.910942 | 3.505182  | 1.308586  |
| C    | 1.775678 | 2.375947  | 1.071715  |
| H    | 5.596074 | 2.486739  | 0.466593  |
| H    | 4.501152 | 4.346106  | 1.662228  |
| H    | 0.708987 | 2.389769  | 1.252093  |
| H    | 2.037216 | 4.275609  | 2.048435  |
| C    | 4.372046 | 0.234767  | -0.530046 |
| C    | 5.236116 | -2.029664 | -1.882671 |
| C    | 5.721496 | 0.107459  | -0.891749 |

|    |           |           |           |
|----|-----------|-----------|-----------|
| N  | 3.493339  | -0.753192 | -0.849609 |
| C  | 3.911732  | -1.850987 | -1.501862 |
| C  | 6.154992  | -1.025685 | -1.569371 |
| H  | 6.423190  | 0.895282  | -0.643424 |
| H  | 3.150099  | -2.598394 | -1.695302 |
| H  | 7.199944  | -1.126117 | -1.849384 |
| H  | 5.533083  | -2.933238 | -2.404090 |
| Rh | 1.492214  | -0.379828 | -0.338994 |
| C  | 1.606097  | -2.172705 | 0.684901  |
| O  | 1.138507  | -2.734670 | -0.321559 |
| O  | 2.048467  | -2.367695 | 1.784973  |
| P  | -0.927245 | -0.088969 | -0.002085 |
| C  | -1.587016 | 1.643984  | 0.400581  |
| C  | -1.195741 | 2.652374  | -0.538645 |
| C  | -1.576821 | 3.981108  | -0.337148 |
| H  | -1.262339 | 4.722479  | -1.068498 |
| C  | -2.336424 | 4.389368  | 0.759246  |
| C  | -2.733378 | 3.400942  | 1.650167  |
| H  | -3.350692 | 3.677831  | 2.502798  |
| C  | -2.392102 | 2.044756  | 1.502862  |
| C  | -0.377954 | 2.390578  | -1.785450 |
| H  | -0.091564 | 3.339418  | -2.248498 |
| H  | -0.938852 | 1.814111  | -2.527299 |
| H  | 0.544327  | 1.842759  | -1.565140 |
| C  | -2.703667 | 5.839477  | 0.962186  |
| H  | -3.075981 | 6.291651  | 0.035455  |
| H  | -1.832524 | 6.427867  | 1.278928  |
| H  | -3.475975 | 5.953972  | 1.729485  |
| C  | -2.980106 | 1.158275  | 2.587513  |
| H  | -2.381330 | 1.207556  | 3.504200  |
| H  | -3.061254 | 0.112062  | 2.316069  |
| H  | -3.982318 | 1.519829  | 2.841779  |
| C  | -1.983668 | -0.427089 | -1.547257 |
| C  | -3.398926 | -0.263228 | -1.518075 |
| C  | -4.140005 | -0.378027 | -2.700172 |
| H  | -5.219461 | -0.253413 | -2.643656 |
| C  | -3.554603 | -0.657336 | -3.932699 |
| C  | -2.178136 | -0.862264 | -3.944158 |
| H  | -1.692365 | -1.117954 | -4.883003 |
| C  | -1.383324 | -0.763876 | -2.792815 |
| C  | -4.215149 | -0.023324 | -0.268079 |
| H  | -4.189645 | 1.024778  | 0.042793  |
| H  | -3.869142 | -0.628246 | 0.571407  |
| H  | -5.260931 | -0.287252 | -0.453533 |
| C  | -4.376164 | -0.733369 | -5.196636 |

|   |           |           |           |
|---|-----------|-----------|-----------|
| H | -3.898287 | -1.370519 | -5.948181 |
| H | -4.503785 | 0.261193  | -5.644886 |
| H | -5.378216 | -1.130090 | -5.000112 |
| C | 0.082532  | -1.071865 | -2.997986 |
| H | 0.278236  | -1.281337 | -4.054697 |
| H | 0.398125  | -1.944963 | -2.420074 |
| H | 0.732355  | -0.237497 | -2.705824 |
| C | -1.345201 | -1.345757 | 1.332513  |
| C | -1.981727 | -2.593138 | 1.077811  |
| C | -2.237364 | -3.455900 | 2.154083  |
| H | -2.736738 | -4.399082 | 1.943753  |
| C | -1.855967 | -3.174256 | 3.462773  |
| C | -1.132110 | -2.002127 | 3.673452  |
| H | -0.752018 | -1.783827 | 4.669038  |
| C | -0.841669 | -1.103208 | 2.644274  |
| C | -2.345274 | -3.144635 | -0.287707 |
| H | -1.524848 | -3.027241 | -0.998133 |
| H | -3.234263 | -2.684259 | -0.726233 |
| H | -2.544052 | -4.216790 | -0.195719 |
| C | -2.185507 | -4.108600 | 4.601535  |
| H | -3.063002 | -3.757748 | 5.161626  |
| H | -1.355200 | -4.178730 | 5.312972  |
| H | -2.409722 | -5.117537 | 4.240095  |
| C | 0.064607  | 0.051877  | 3.005212  |
| H | 0.103949  | 0.174650  | 4.092473  |
| H | -0.237927 | 1.006332  | 2.575706  |
| H | 1.080918  | -0.155043 | 2.654847  |

19

|                                  |                     |         |         |
|----------------------------------|---------------------|---------|---------|
| B3LYP SCF energy:                | -2604.43613495 a.u. |         |         |
| B3LYP enthalpy:                  | -2603.563506 a.u.   |         |         |
| B3LYP free energy:               | -2603.713307 a.u.   |         |         |
| M06 SCF energy in solution:      | -2604.62139793 a.u. |         |         |
| M06 enthalpy in solution:        | -2603.748769 a.u.   |         |         |
| M06 free energy in solution:     | -2603.898570 a.u.   |         |         |
| Three lowest frequencies (cm-1): | 19.4279             | 24.1076 | 27.6122 |

Cartesian coordinates

| ATOM | X         | Y        | Z         |
|------|-----------|----------|-----------|
| C    | -1.522162 | 3.709479 | -0.031769 |
| C    | 0.861340  | 4.685746 | -1.092139 |
| C    | -0.441805 | 2.806631 | -0.239851 |
| C    | -1.399451 | 5.065267 | -0.373576 |

|    |           |           |           |
|----|-----------|-----------|-----------|
| C  | -0.213748 | 5.556196  | -0.910170 |
| C  | 0.745487  | 3.331997  | -0.759167 |
| H  | -2.232432 | 5.745195  | -0.217011 |
| H  | -0.127431 | 6.606261  | -1.174744 |
| H  | 1.608256  | 2.696098  | -0.902115 |
| H  | 1.799972  | 5.056176  | -1.497726 |
| C  | -2.732787 | 3.158057  | 0.578357  |
| C  | -4.859200 | 1.843315  | 1.772070  |
| C  | -3.904092 | 3.862952  | 0.881555  |
| N  | -2.645558 | 1.834037  | 0.875817  |
| C  | -3.676463 | 1.185472  | 1.446584  |
| C  | -4.970716 | 3.203186  | 1.483052  |
| H  | -3.977559 | 4.917894  | 0.644135  |
| H  | -3.567905 | 0.113470  | 1.612233  |
| H  | -5.882849 | 3.745326  | 1.716541  |
| H  | -5.671304 | 1.284693  | 2.223890  |
| Rh | -0.826509 | 0.922053  | 0.354015  |
| C  | -1.885290 | 0.116107  | -1.167187 |
| O  | -2.180313 | -1.009023 | -0.629214 |
| O  | -2.150019 | 0.653833  | -2.210590 |
| Al | -3.783143 | -2.077064 | -0.463163 |
| C  | -5.210884 | -1.067272 | -1.403064 |
| H  | -5.013158 | -0.982943 | -2.480312 |
| H  | -5.337881 | -0.043480 | -1.024509 |
| H  | -6.186643 | -1.565033 | -1.298742 |
| C  | -3.329146 | -3.900379 | -1.113932 |
| H  | -2.883880 | -3.862009 | -2.117974 |
| H  | -4.218441 | -4.542778 | -1.191181 |
| H  | -2.614191 | -4.427360 | -0.467115 |
| O  | -3.840995 | -1.952950 | 1.321778  |
| C  | -4.349586 | -2.914839 | 2.202174  |
| H  | -4.191793 | -3.946879 | 1.846000  |
| H  | -5.433403 | -2.792303 | 2.374752  |
| H  | -3.857705 | -2.836463 | 3.186180  |
| P  | 1.244742  | -0.373142 | -0.047316 |
| C  | 2.861440  | 0.608655  | -0.063852 |
| C  | 3.021880  | 1.499216  | 1.046892  |
| C  | 4.152589  | 2.314217  | 1.127285  |
| H  | 4.247283  | 2.981182  | 1.981276  |
| C  | 5.157332  | 2.307425  | 0.157863  |
| C  | 5.005963  | 1.418739  | -0.897920 |
| H  | 5.783491  | 1.364035  | -1.657688 |
| C  | 3.898691  | 0.562489  | -1.033372 |
| C  | 2.039695  | 1.627910  | 2.192779  |
| H  | 2.366509  | 2.416838  | 2.876494  |

|   |           |           |           |
|---|-----------|-----------|-----------|
| H | 1.955159  | 0.702673  | 2.769990  |
| H | 1.035124  | 1.901982  | 1.847009  |
| C | 6.351019  | 3.225400  | 0.262643  |
| H | 6.800622  | 3.184064  | 1.261752  |
| H | 6.064244  | 4.269661  | 0.083020  |
| H | 7.123192  | 2.963524  | -0.467442 |
| C | 3.992873  | -0.355069 | -2.240527 |
| H | 3.840146  | 0.207950  | -3.168908 |
| H | 3.282466  | -1.173646 | -2.240403 |
| H | 5.000946  | -0.781752 | -2.289479 |
| C | 1.604006  | -1.520458 | 1.415737  |
| C | 2.824494  | -2.246728 | 1.508365  |
| C | 3.114374  | -2.967857 | 2.672460  |
| H | 4.051870  | -3.518416 | 2.714801  |
| C | 2.245254  | -3.026221 | 3.760486  |
| C | 1.028818  | -2.360003 | 3.634606  |
| H | 0.306227  | -2.420717 | 4.445081  |
| C | 0.687379  | -1.618244 | 2.496017  |
| C | 3.841651  | -2.366428 | 0.396099  |
| H | 4.518395  | -1.507657 | 0.363268  |
| H | 3.370713  | -2.456425 | -0.584167 |
| H | 4.451915  | -3.261790 | 0.549470  |
| C | 2.603633  | -3.784043 | 5.015401  |
| H | 1.709349  | -4.130493 | 5.543639  |
| H | 3.168550  | -3.149042 | 5.711037  |
| H | 3.228136  | -4.655909 | 4.792975  |
| C | -0.685639 | -0.988169 | 2.518348  |
| H | -1.277317 | -1.390408 | 3.346383  |
| H | -1.274826 | -1.200645 | 1.618054  |
| H | -0.633391 | 0.098622  | 2.679617  |
| C | 0.958665  | -1.382214 | -1.606482 |
| C | 0.648607  | -2.771738 | -1.599193 |
| C | 0.407800  | -3.417685 | -2.821427 |
| H | 0.182294  | -4.480853 | -2.798770 |
| C | 0.415927  | -2.759993 | -4.047113 |
| C | 0.650240  | -1.386312 | -4.028211 |
| H | 0.625233  | -0.829653 | -4.962412 |
| C | 0.894987  | -0.681300 | -2.847669 |
| C | 0.480236  | -3.650532 | -0.374836 |
| H | -0.199118 | -3.206862 | 0.355431  |
| H | 1.419938  | -3.869166 | 0.137677  |
| H | 0.040312  | -4.603729 | -0.679471 |
| C | 0.129787  | -3.488108 | -5.337761 |
| H | 0.808586  | -3.168651 | -6.136977 |
| H | -0.892719 | -3.286885 | -5.682521 |

|   |          |           |           |
|---|----------|-----------|-----------|
| H | 0.229772 | -4.571538 | -5.217733 |
| C | 1.035289 | 0.816972  | -2.992282 |
| H | 1.236848 | 1.074638  | -4.036808 |
| H | 1.836603 | 1.243018  | -2.390281 |
| H | 0.103060 | 1.312615  | -2.706151 |

19b

|                                  |                     |         |         |
|----------------------------------|---------------------|---------|---------|
| B3LYP SCF energy:                | -2565.13385193 a.u. |         |         |
| B3LYP enthalpy:                  | -2564.291337 a.u.   |         |         |
| B3LYP free energy:               | -2564.441479 a.u.   |         |         |
| M06 SCF energy in solution:      | -2565.33768562 a.u. |         |         |
| M06 enthalpy in solution:        | -2564.495171 a.u.   |         |         |
| M06 free energy in solution:     | -2564.645313 a.u.   |         |         |
| Three lowest frequencies (cm-1): | 14.2196             | 17.5610 | 21.6911 |

Cartesian coordinates

| ATOM | X         | Y         | Z         |
|------|-----------|-----------|-----------|
| C    | 1.341206  | 3.653052  | -0.191972 |
| C    | -0.955916 | 4.517606  | 1.127377  |
| C    | 0.335013  | 2.701060  | 0.133684  |
| C    | 1.178065  | 5.007521  | 0.137114  |
| C    | 0.033537  | 5.443855  | 0.796941  |
| C    | -0.805150 | 3.166426  | 0.797135  |
| H    | 1.952299  | 5.727526  | -0.113720 |
| H    | -0.082782 | 6.493232  | 1.052560  |
| H    | -1.606273 | 2.486322  | 1.055869  |
| H    | -1.855116 | 4.842491  | 1.645635  |
| C    | 2.544345  | 3.141015  | -0.852218 |
| C    | 4.718590  | 1.873890  | -2.012933 |
| C    | 3.653337  | 3.894354  | -1.256828 |
| N    | 2.533330  | 1.796202  | -1.053971 |
| C    | 3.591482  | 1.169830  | -1.598604 |
| C    | 4.742222  | 3.258364  | -1.844266 |
| H    | 3.664386  | 4.967363  | -1.104058 |
| H    | 3.551457  | 0.081753  | -1.660809 |
| H    | 5.606659  | 3.838416  | -2.155376 |
| H    | 5.556808  | 1.334730  | -2.440157 |
| Rh   | 0.764626  | 0.831132  | -0.457479 |
| C    | 1.847472  | 0.200669  | 1.146447  |
| O    | 2.183378  | -0.979538 | 0.781105  |
| O    | 2.078245  | 0.885567  | 2.107704  |
| Al   | 3.831975  | -1.969076 | 0.683517  |
| C    | 5.208324  | -0.873266 | 1.602902  |



|   |           |           |           |
|---|-----------|-----------|-----------|
| H | 5.004998  | -0.765471 | 2.676965  |
| H | 5.285445  | 0.143299  | 1.192200  |
| H | 6.207497  | -1.325355 | 1.513364  |
| C | 3.391208  | -3.773366 | 1.394982  |
| H | 3.071471  | -3.718304 | 2.445264  |
| H | 4.249331  | -4.460554 | 1.366473  |
| H | 2.577717  | -4.262570 | 0.840066  |
| O | 3.947372  | -1.926734 | -1.104828 |
| C | 4.574712  | -2.887601 | -1.905879 |
| H | 4.441445  | -3.914701 | -1.525617 |
| H | 5.661528  | -2.713638 | -1.998914 |
| H | 4.160111  | -2.868429 | -2.928017 |
| P | -1.268004 | -0.420466 | 0.046691  |
| C | -2.829520 | 0.615496  | -0.069179 |
| C | -2.962975 | 1.342456  | -1.292457 |
| C | -4.055329 | 2.190643  | -1.482769 |
| H | -4.135536 | 2.726399  | -2.426161 |
| C | -5.036238 | 2.378819  | -0.508118 |
| C | -4.900837 | 1.658423  | 0.673307  |
| H | -5.660768 | 1.767348  | 1.444254  |
| C | -3.833688 | 0.778659  | 0.923260  |
| C | -1.973738 | 1.265706  | -2.436683 |
| H | -2.318222 | 1.881827  | -3.272581 |
| H | -1.837964 | 0.246651  | -2.809289 |
| H | -0.986959 | 1.650002  | -2.140343 |
| C | -6.188455 | 3.328050  | -0.731439 |
| H | -6.647244 | 3.176186  | -1.715455 |
| H | -5.853143 | 4.372598  | -0.691376 |
| H | -6.965926 | 3.201088  | 0.028528  |
| C | -3.900589 | 0.087911  | 2.273379  |
| H | -3.334741 | 0.635354  | 3.034827  |
| H | -3.512304 | -0.928078 | 2.272854  |
| H | -4.942276 | 0.050662  | 2.607711  |
| C | -1.592412 | -1.781779 | -1.207570 |
| C | -2.830187 | -2.482391 | -1.261823 |
| C | -3.043698 | -3.424232 | -2.273661 |
| H | -3.993631 | -3.954572 | -2.290850 |
| C | -2.085515 | -3.719959 | -3.243750 |
| C | -0.868011 | -3.049135 | -3.162177 |
| H | -0.088209 | -3.275391 | -3.885665 |
| C | -0.601599 | -2.091214 | -2.174975 |
| C | -3.952050 | -2.319351 | -0.261034 |
| H | -4.534789 | -1.410737 | -0.439084 |
| H | -3.584513 | -2.275272 | 0.766235  |
| H | -4.636372 | -3.170744 | -0.326794 |

|   |           |           |           |
|---|-----------|-----------|-----------|
| C | -2.361691 | -4.723560 | -4.336772 |
| H | -1.433421 | -5.119153 | -4.761101 |
| H | -2.929501 | -4.265709 | -5.157765 |
| H | -2.954234 | -5.566930 | -3.965656 |
| C | 0.763645  | -1.446170 | -2.228443 |
| H | 1.439149  | -2.012913 | -2.875519 |
| H | 1.266758  | -1.422148 | -1.255063 |
| H | 0.713608  | -0.430715 | -2.650482 |
| C | -1.035885 | -1.127078 | 1.747730  |
| C | -0.861658 | -2.481567 | 2.122014  |
| C | -0.613328 | -2.758640 | 3.477819  |
| H | -0.481458 | -3.799440 | 3.764700  |
| C | -0.495160 | -1.776988 | 4.461985  |
| C | -0.610408 | -0.441565 | 4.059848  |
| H | -0.477315 | 0.361874  | 4.779931  |
| C | -0.860847 | -0.132514 | 2.731121  |
| C | -0.854224 | -3.665880 | 1.178692  |
| H | -0.136795 | -3.528719 | 0.365160  |
| H | -1.828730 | -3.860940 | 0.723124  |
| H | -0.558672 | -4.565970 | 1.725126  |
| C | -0.206848 | -2.136059 | 5.899514  |
| H | -0.951705 | -1.700683 | 6.577103  |
| H | 0.773435  | -1.754265 | 6.210733  |
| H | -0.205938 | -3.220012 | 6.050141  |
| H | -0.901819 | 0.913589  | 2.447245  |

20-TS

|                                  |                     |         |         |
|----------------------------------|---------------------|---------|---------|
| B3LYP SCF energy:                | -2166.90721408 a.u. |         |         |
| B3LYP enthalpy:                  | -2166.162968 a.u.   |         |         |
| B3LYP free energy:               | -2166.285465 a.u.   |         |         |
| M06 SCF energy in solution:      | -2167.18159109 a.u. |         |         |
| M06 enthalpy in solution:        | -2166.437345 a.u.   |         |         |
| M06 free energy in solution:     | -2166.559842 a.u.   |         |         |
| Three lowest frequencies (cm-1): | -220.9736           | 21.0467 | 22.5632 |
| Imaginary frequency:             | -220.9736 cm-1      |         |         |

Cartesian coordinates

| ATOM | X        | Y         | Z         |
|------|----------|-----------|-----------|
| C    | 3.969719 | -0.134505 | 0.179001  |
| C    | 4.702824 | -2.819481 | 0.405028  |
| C    | 3.335357 | -1.091052 | -0.662381 |
| C    | 4.945608 | -0.517325 | 1.105359  |
| C    | 5.315930 | -1.859067 | 1.214179  |

|    |           |           |           |
|----|-----------|-----------|-----------|
| C  | 3.728841  | -2.434372 | -0.516988 |
| H  | 5.391877  | 0.222002  | 1.766569  |
| H  | 6.078045  | -2.152727 | 1.931272  |
| H  | 3.292724  | -3.164337 | -1.192915 |
| H  | 4.998394  | -3.862964 | 0.483154  |
| C  | 3.507409  | 1.258604  | 0.073790  |
| C  | 2.461405  | 3.787377  | -0.225280 |
| C  | 4.337146  | 2.371245  | 0.236282  |
| N  | 2.179914  | 1.404970  | -0.195693 |
| C  | 1.681111  | 2.642768  | -0.348306 |
| C  | 3.814571  | 3.650382  | 0.082276  |
| H  | 5.389519  | 2.216740  | 0.447552  |
| H  | 0.624359  | 2.709175  | -0.568277 |
| H  | 4.452825  | 4.523050  | 0.186806  |
| H  | 2.006036  | 4.761191  | -0.371501 |
| Rh | 1.208702  | -0.407658 | -0.391225 |
| C  | 2.993534  | -0.695487 | -2.393276 |
| O  | 3.424484  | 0.413099  | -2.670546 |
| O  | 2.508228  | -1.662427 | -2.979757 |
| P  | -1.053004 | -0.035221 | 0.175749  |
| C  | -1.793832 | 1.641399  | -0.183404 |
| C  | -1.544257 | 2.152753  | -1.494135 |
| C  | -1.968411 | 3.447488  | -1.820469 |
| H  | -1.767661 | 3.815815  | -2.824186 |
| C  | -2.640229 | 4.268794  | -0.916257 |
| C  | -2.921475 | 3.735975  | 0.340631  |
| H  | -3.485975 | 4.336327  | 1.051096  |
| C  | -2.531489 | 2.446746  | 0.729234  |
| C  | -0.879327 | 1.364732  | -2.603647 |
| H  | -1.535460 | 0.569590  | -2.975480 |
| H  | 0.049102  | 0.874041  | -2.282747 |
| H  | -0.643215 | 2.022435  | -3.445122 |
| C  | -3.049057 | 5.674871  | -1.283857 |
| H  | -3.950428 | 5.984657  | -0.744274 |
| H  | -3.244733 | 5.767696  | -2.357361 |
| H  | -2.257947 | 6.394975  | -1.034718 |
| C  | -3.009903 | 2.013182  | 2.101613  |
| H  | -2.214622 | 2.019675  | 2.852462  |
| H  | -3.428380 | 1.004344  | 2.104560  |
| H  | -3.790055 | 2.698708  | 2.446466  |
| C  | -1.977484 | -1.221863 | -0.936221 |
| C  | -3.322883 | -1.073853 | -1.373402 |
| C  | -3.860281 | -2.026486 | -2.245494 |
| H  | -4.890696 | -1.902534 | -2.572474 |
| C  | -3.140063 | -3.136109 | -2.695669 |

|   |           |           |           |
|---|-----------|-----------|-----------|
| C | -1.832526 | -3.280713 | -2.239008 |
| H | -1.242707 | -4.135655 | -2.563246 |
| C | -1.237912 | -2.338456 | -1.391293 |
| C | -4.260811 | 0.035718  | -0.943065 |
| H | -4.063420 | 0.973692  | -1.471864 |
| H | -4.193901 | 0.253587  | 0.125175  |
| H | -5.294866 | -0.252713 | -1.157019 |
| C | -3.752539 | -4.127342 | -3.655353 |
| H | -3.288792 | -5.114774 | -3.562120 |
| H | -3.617990 | -3.800963 | -4.695158 |
| H | -4.829289 | -4.237308 | -3.486438 |
| C | 0.213760  | -2.573381 | -1.053070 |
| H | 0.417050  | -3.635106 | -0.866700 |
| H | 0.531697  | -2.142460 | -0.050440 |
| H | 0.877502  | -2.284073 | -1.881819 |
| C | -1.308806 | -0.541973 | 1.973109  |
| C | -2.141883 | -1.603907 | 2.429019  |
| C | -2.108197 | -1.964150 | 3.785588  |
| H | -2.752428 | -2.777027 | 4.113178  |
| C | -1.305408 | -1.327402 | 4.726938  |
| C | -0.514972 | -0.273393 | 4.273098  |
| H | 0.112996  | 0.263377  | 4.981255  |
| C | -0.489352 | 0.121444  | 2.932891  |
| C | -3.118340 | -2.406539 | 1.590800  |
| H | -2.625601 | -3.024272 | 0.835786  |
| H | -3.839002 | -1.775384 | 1.067460  |
| H | -3.687290 | -3.076037 | 2.242630  |
| C | -1.280615 | -1.764749 | 6.171361  |
| H | -2.199185 | -2.293246 | 6.446923  |
| H | -1.162984 | -0.910216 | 6.847039  |
| H | -0.440835 | -2.446001 | 6.363197  |
| C | 0.448940  | 1.257849  | 2.598187  |
| H | 0.760544  | 1.771256  | 3.513669  |
| H | 0.008473  | 2.007205  | 1.934524  |
| H | 1.342063  | 0.872674  | 2.097380  |

21-TS

|                              |                     |
|------------------------------|---------------------|
| B3LYP SCF energy:            | -2166.88785275 a.u. |
| B3LYP enthalpy:              | -2166.144066 a.u.   |
| B3LYP free energy:           | -2166.268367 a.u.   |
| M06 SCF energy in solution:  | -2167.17076318 a.u. |
| M06 enthalpy in solution:    | -2166.426976 a.u.   |
| M06 free energy in solution: | -2166.551277 a.u.   |

Three lowest frequencies (cm-1):     -172.0749     16.7380     18.9880  
Imaginary frequency:                     -172.0749 cm-1

Cartesian coordinates

| ATOM | X         | Y         | Z         |
|------|-----------|-----------|-----------|
| C    | 3.541793  | 1.169996  | -0.055772 |
| C    | 2.230918  | 3.489804  | 0.764928  |
| C    | 2.535107  | 1.058842  | 0.959946  |
| C    | 3.881828  | 2.398803  | -0.626086 |
| C    | 3.224394  | 3.560753  | -0.215628 |
| C    | 1.905530  | 2.262912  | 1.342582  |
| H    | 4.635344  | 2.447494  | -1.408930 |
| H    | 3.490340  | 4.517342  | -0.658120 |
| H    | 1.192167  | 2.224431  | 2.156637  |
| H    | 1.727448  | 4.395432  | 1.093321  |
| C    | 4.172022  | -0.089800 | -0.482084 |
| C    | 5.086631  | -2.599848 | -1.147747 |
| C    | 5.508007  | -0.250500 | -0.856611 |
| N    | 3.313413  | -1.138081 | -0.489228 |
| C    | 3.760658  | -2.362323 | -0.798942 |
| C    | 5.970576  | -1.520062 | -1.189229 |
| H    | 6.174012  | 0.605402  | -0.845140 |
| H    | 3.032067  | -3.165354 | -0.754798 |
| H    | 7.011460  | -1.670573 | -1.461061 |
| H    | 5.412953  | -3.609219 | -1.374961 |
| Rh   | 1.338571  | -0.544850 | -0.137390 |
| C    | 2.894809  | -0.009049 | 2.328396  |
| O    | 3.950476  | -0.607477 | 2.158404  |
| O    | 2.085687  | 0.123352  | 3.242232  |
| P    | -1.022173 | -0.114910 | 0.012785  |
| C    | -1.698654 | 1.654441  | -0.085597 |
| C    | -1.048656 | 2.483228  | -1.054007 |
| C    | -1.414525 | 3.826223  | -1.179297 |
| H    | -0.900542 | 4.431815  | -1.922429 |
| C    | -2.411488 | 4.412514  | -0.399976 |
| C    | -3.072942 | 3.585802  | 0.499243  |
| H    | -3.884165 | 3.997217  | 1.097456  |
| C    | -2.756324 | 2.228107  | 0.672440  |
| C    | 0.008749  | 2.001087  | -2.022848 |
| H    | 0.391452  | 2.842258  | -2.607970 |
| H    | -0.395631 | 1.265061  | -2.727256 |
| H    | 0.856609  | 1.531632  | -1.510642 |
| C    | -2.752950 | 5.877034  | -0.531995 |
| H    | -2.714773 | 6.205301  | -1.576820 |
| H    | -2.043107 | 6.500327  | 0.028082  |

|   |           |           |           |
|---|-----------|-----------|-----------|
| H | -3.753829 | 6.092249  | -0.143597 |
| C | -3.653103 | 1.528219  | 1.679409  |
| H | -3.429998 | 1.868794  | 2.696776  |
| H | -3.574466 | 0.447103  | 1.677810  |
| H | -4.697270 | 1.791753  | 1.475431  |
| C | -1.752449 | -0.823385 | -1.584248 |
| C | -3.115050 | -0.713068 | -1.973265 |
| C | -3.515357 | -1.205747 | -3.221183 |
| H | -4.563874 | -1.113665 | -3.496839 |
| C | -2.636528 | -1.827849 | -4.110445 |
| C | -1.314392 | -1.975744 | -3.699092 |
| H | -0.605215 | -2.486620 | -4.347494 |
| C | -0.869409 | -1.485507 | -2.466365 |
| C | -4.206122 | -0.151199 | -1.094137 |
| H | -4.151650 | 0.938007  | -1.018526 |
| H | -4.153006 | -0.555142 | -0.080193 |
| H | -5.188126 | -0.409089 | -1.502104 |
| C | -3.104482 | -2.320278 | -5.458433 |
| H | -2.443571 | -3.099137 | -5.852669 |
| H | -3.122663 | -1.503426 | -6.192200 |
| H | -4.119584 | -2.728930 | -5.405750 |
| C | 0.576878  | -1.707711 | -2.125795 |
| H | 1.025232  | -2.521726 | -2.704622 |
| H | 0.685309  | -2.084235 | -1.053915 |
| H | 1.182117  | -0.810926 | -2.342032 |
| C | -1.687285 | -1.095667 | 1.472853  |
| C | -2.166977 | -2.433534 | 1.355402  |
| C | -2.590023 | -3.109582 | 2.508622  |
| H | -2.961055 | -4.126038 | 2.397932  |
| C | -2.539522 | -2.548010 | 3.781717  |
| C | -2.000462 | -1.268810 | 3.887721  |
| H | -1.896855 | -0.813949 | 4.870456  |
| C | -1.555036 | -0.542597 | 2.778565  |
| C | -2.219663 | -3.261483 | 0.084810  |
| H | -1.265042 | -3.264220 | -0.447855 |
| H | -2.981967 | -2.927859 | -0.623433 |
| H | -2.445549 | -4.300138 | 0.343981  |
| C | -3.038152 | -3.293830 | 4.995594  |
| H | -2.380975 | -3.136456 | 5.858009  |
| H | -3.100374 | -4.370672 | 4.807353  |
| H | -4.040856 | -2.952600 | 5.286773  |
| C | -0.890921 | 0.775834  | 3.087357  |
| H | -1.273865 | 1.182367  | 4.029703  |
| H | -1.025196 | 1.535516  | 2.318858  |
| H | 0.185830  | 0.603839  | 3.206255  |

22-TS

|                                  |                     |         |         |
|----------------------------------|---------------------|---------|---------|
| B3LYP SCF energy:                | -2604.39404075 a.u. |         |         |
| B3LYP enthalpy:                  | -2603.523649 a.u.   |         |         |
| B3LYP free energy:               | -2603.670308 a.u.   |         |         |
| M06 SCF energy in solution:      | -2604.58617272 a.u. |         |         |
| M06 enthalpy in solution:        | -2603.715781 a.u.   |         |         |
| M06 free energy in solution:     | -2603.862440 a.u.   |         |         |
| Three lowest frequencies (cm-1): | -295.9755           | 19.6332 | 19.8213 |
| Imaginary frequency:             | -295.9755 cm-1      |         |         |

Cartesian coordinates

| ATOM | X         | Y         | Z         |
|------|-----------|-----------|-----------|
| C    | -2.630401 | -2.656007 | -0.642484 |
| C    | -2.479904 | -4.748732 | 1.207066  |
| C    | -2.052348 | -2.419646 | 0.632827  |
| C    | -3.113227 | -3.925608 | -0.977739 |
| C    | -3.039192 | -4.969430 | -0.055033 |
| C    | -1.999400 | -3.484440 | 1.547419  |
| H    | -3.518564 | -4.113140 | -1.968516 |
| H    | -3.419685 | -5.951958 | -0.319941 |
| H    | -1.622950 | -3.294063 | 2.547708  |
| H    | -2.434615 | -5.558733 | 1.930337  |
| C    | -2.635194 | -1.525888 | -1.577212 |
| C    | -2.555777 | 0.744257  | -3.137514 |
| C    | -3.526275 | -1.389371 | -2.644720 |
| N    | -1.704598 | -0.562408 | -1.317859 |
| C    | -1.690284 | 0.551165  | -2.065659 |
| C    | -3.485559 | -0.247965 | -3.438564 |
| H    | -4.263988 | -2.163531 | -2.822960 |
| H    | -0.961523 | 1.300862  | -1.795963 |
| H    | -4.182364 | -0.126723 | -4.262649 |
| H    | -2.502644 | 1.667925  | -3.702699 |
| Rh   | -0.524021 | -0.958512 | 0.324924  |
| C    | -2.499954 | -0.844060 | 1.570437  |
| O    | -3.418841 | -0.252418 | 0.942550  |
| O    | -2.137706 | -0.859496 | 2.731536  |
| Al   | -4.436054 | 1.372089  | 1.180369  |
| C    | -6.252314 | 0.823561  | 0.570781  |
| H    | -6.252955 | 0.420192  | -0.452507 |
| H    | -6.976432 | 1.651278  | 0.583476  |
| H    | -6.668557 | 0.038488  | 1.218553  |
| C    | -4.189844 | 1.949532  | 3.063749  |

|   |           |           |           |
|---|-----------|-----------|-----------|
| H | -4.565228 | 1.206230  | 3.780657  |
| H | -4.729464 | 2.887161  | 3.265636  |
| H | -3.136282 | 2.128344  | 3.317838  |
| O | -3.600129 | 2.430650  | 0.009314  |
| C | -4.217518 | 3.285395  | -0.903893 |
| H | -3.594740 | 3.406699  | -1.808948 |
| H | -4.373171 | 4.299218  | -0.491360 |
| H | -5.203074 | 2.921909  | -1.243167 |
| P | 1.609952  | 0.240527  | -0.081355 |
| C | 1.506426  | 1.838186  | -1.029291 |
| C | 0.491964  | 2.741965  | -0.596537 |
| C | 0.261961  | 3.915605  | -1.328256 |
| H | -0.523063 | 4.584956  | -0.984042 |
| C | 1.000177  | 4.248246  | -2.462004 |
| C | 2.021403  | 3.375065  | -2.841842 |
| H | 2.639918  | 3.630698  | -3.699875 |
| C | 2.301926  | 2.186589  | -2.157120 |
| C | -0.342309 | 2.563517  | 0.653916  |
| H | 0.144258  | 3.048241  | 1.510574  |
| H | -0.495738 | 1.514021  | 0.924204  |
| H | -1.340156 | 2.992288  | 0.522663  |
| C | 0.709949  | 5.501176  | -3.252669 |
| H | 0.065599  | 5.283704  | -4.115081 |
| H | 1.629507  | 5.951369  | -3.642796 |
| H | 0.194962  | 6.249533  | -2.642067 |
| C | 3.495426  | 1.400973  | -2.663854 |
| H | 3.213496  | 0.481009  | -3.184786 |
| H | 4.175699  | 1.108330  | -1.860048 |
| H | 4.061936  | 2.015575  | -3.369978 |
| C | 2.181383  | 0.665947  | 1.644059  |
| C | 2.881952  | 1.833510  | 2.038319  |
| C | 3.174469  | 2.015797  | 3.398699  |
| H | 3.705307  | 2.918873  | 3.692049  |
| C | 2.830157  | 1.091201  | 4.382881  |
| C | 2.175290  | -0.072149 | 3.971152  |
| H | 1.902903  | -0.823603 | 4.709082  |
| C | 1.839197  | -0.286990 | 2.634780  |
| C | 3.389418  | 2.913861  | 1.104317  |
| H | 2.592309  | 3.588937  | 0.777838  |
| H | 3.850187  | 2.511180  | 0.199292  |
| H | 4.143248  | 3.517770  | 1.618854  |
| C | 3.135907  | 1.339566  | 5.839698  |
| H | 3.453500  | 0.420768  | 6.345226  |
| H | 2.246819  | 1.707940  | 6.367976  |
| H | 3.925286  | 2.087880  | 5.962922  |



|   |           |           |           |
|---|-----------|-----------|-----------|
| C | 1.089032  | -1.554099 | 2.295394  |
| H | 1.053516  | -2.239201 | 3.149123  |
| H | 1.513129  | -2.116477 | 1.458135  |
| H | -0.000495 | -1.324573 | 2.173313  |
| C | 2.859849  | -0.958549 | -0.817257 |
| C | 4.136950  | -1.263547 | -0.264523 |
| C | 4.880293  | -2.321895 | -0.808859 |
| H | 5.851286  | -2.541783 | -0.370752 |
| C | 4.446088  | -3.084012 | -1.890142 |
| C | 3.225183  | -2.731782 | -2.462981 |
| H | 2.871897  | -3.272894 | -3.338249 |
| C | 2.429787  | -1.701332 | -1.954092 |
| C | 4.832731  | -0.506708 | 0.850502  |
| H | 4.389090  | -0.686181 | 1.833249  |
| H | 4.825478  | 0.572788  | 0.685430  |
| H | 5.879830  | -0.820274 | 0.899687  |
| C | 5.262250  | -4.236415 | -2.422564 |
| H | 6.322602  | -4.127048 | -2.172432 |
| H | 5.174876  | -4.320921 | -3.511319 |
| H | 4.922085  | -5.189463 | -1.995900 |
| C | 1.136637  | -1.432646 | -2.687806 |
| H | 1.159384  | -1.904176 | -3.675547 |
| H | 0.940995  | -0.366410 | -2.835480 |
| H | 0.284732  | -1.841113 | -2.135264 |

22-TSa

|                                  |                |         |         |
|----------------------------------|----------------|---------|---------|
| B3LYP SCF energy:                | -2604.37847666 | a.u.    |         |
| B3LYP enthalpy:                  | -2603.508092   | a.u.    |         |
| B3LYP free energy:               | -2603.653576   | a.u.    |         |
| M06 SCF energy in solution:      | -2604.57599450 | a.u.    |         |
| M06 enthalpy in solution:        | -2603.705610   | a.u.    |         |
| M06 free energy in solution:     | -2603.851094   | a.u.    |         |
| Three lowest frequencies (cm-1): | -328.0358      | 20.3633 | 21.3452 |
| Imaginary frequency:             | -328.0358      | cm-1    |         |

Cartesian coordinates

| ATOM | X         | Y         | Z        |
|------|-----------|-----------|----------|
| C    | -2.551348 | -2.787789 | 0.530002 |
| C    | -0.795933 | -3.840354 | 2.434422 |
| C    | -1.537075 | -1.942778 | 1.074904 |
| C    | -2.683864 | -4.114493 | 0.956067 |
| C    | -1.810051 | -4.643139 | 1.904337 |
| C    | -0.678411 | -2.512232 | 2.034421 |

|    |           |           |           |
|----|-----------|-----------|-----------|
| H  | -3.445399 | -4.752346 | 0.515929  |
| H  | -1.918423 | -5.675568 | 2.225045  |
| H  | 0.060392  | -1.877746 | 2.500115  |
| H  | -0.109837 | -4.245341 | 3.173566  |
| C  | -3.376023 | -2.236833 | -0.549145 |
| C  | -4.736068 | -0.991059 | -2.593910 |
| C  | -4.638155 | -2.708759 | -0.921563 |
| N  | -2.807445 | -1.186067 | -1.189727 |
| C  | -3.480092 | -0.565403 | -2.169787 |
| C  | -5.322382 | -2.085622 | -1.960659 |
| H  | -5.083862 | -3.537268 | -0.382735 |
| H  | -3.016729 | 0.319483  | -2.581523 |
| H  | -6.307727 | -2.434627 | -2.255354 |
| H  | -5.246953 | -0.450061 | -3.382972 |
| Rh | -0.888479 | -0.638222 | -0.497319 |
| C  | -1.989393 | -0.211684 | 1.560719  |
| O  | -3.168852 | 0.106084  | 1.194560  |
| O  | -1.273697 | 0.226734  | 2.432365  |
| Al | -3.801927 | 1.856453  | 0.758679  |
| C  | -5.755786 | 1.571788  | 0.491333  |
| H  | -6.264884 | 1.356111  | 1.441895  |
| H  | -5.977064 | 0.733455  | -0.184349 |
| H  | -6.253460 | 2.457355  | 0.068515  |
| C  | -3.238266 | 3.135673  | 2.171059  |
| H  | -3.711207 | 2.904632  | 3.136320  |
| H  | -3.514212 | 4.173004  | 1.927551  |
| H  | -2.153285 | 3.119421  | 2.336447  |
| O  | -2.920875 | 2.113778  | -0.801891 |
| C  | -3.142878 | 3.274422  | -1.555137 |
| H  | -2.902624 | 4.199893  | -1.002161 |
| H  | -4.188999 | 3.367023  | -1.900295 |
| H  | -2.508603 | 3.274824  | -2.458798 |
| P  | 1.397677  | 0.157316  | -0.022319 |
| C  | 2.768027  | -1.134647 | 0.309041  |
| C  | 2.632377  | -2.349139 | -0.440342 |
| C  | 3.535754  | -3.397798 | -0.252584 |
| H  | 3.397753  | -4.305059 | -0.836591 |
| C  | 4.605509  | -3.322562 | 0.638766  |
| C  | 4.764153  | -2.124039 | 1.318678  |
| H  | 5.608125  | -2.009637 | 1.996874  |
| C  | 3.893213  | -1.029184 | 1.175314  |
| C  | 1.584842  | -2.589149 | -1.503319 |
| H  | 1.678483  | -3.604141 | -1.901432 |
| H  | 1.702498  | -1.895057 | -2.342934 |
| H  | 0.563839  | -2.472050 | -1.116131 |

|   |           |           |           |
|---|-----------|-----------|-----------|
| C | 5.542632  | -4.487659 | 0.843691  |
| H | 5.072253  | -5.271646 | 1.451714  |
| H | 6.459520  | -4.179075 | 1.356019  |
| H | 5.824517  | -4.947398 | -0.110614 |
| C | 4.341060  | 0.168047  | 1.999117  |
| H | 4.379221  | -0.101193 | 3.059819  |
| H | 3.718053  | 1.048529  | 1.903844  |
| H | 5.361245  | 0.445754  | 1.709901  |
| C | 2.014162  | 0.828109  | -1.688869 |
| C | 3.303797  | 1.380816  | -1.910063 |
| C | 3.680781  | 1.761882  | -3.203668 |
| H | 4.672383  | 2.187090  | -3.343795 |
| C | 2.838430  | 1.635491  | -4.308572 |
| C | 1.558656  | 1.139464  | -4.074174 |
| H | 0.854714  | 1.064640  | -4.900522 |
| C | 1.140455  | 0.747463  | -2.797864 |
| C | 4.312677  | 1.639463  | -0.820530 |
| H | 4.805197  | 0.714965  | -0.508105 |
| H | 3.851908  | 2.091030  | 0.060292  |
| H | 5.088162  | 2.323034  | -1.179051 |
| C | 3.294425  | 2.023917  | -5.693910 |
| H | 2.446376  | 2.271882  | -6.340587 |
| H | 3.842421  | 1.201710  | -6.173277 |
| H | 3.967146  | 2.887962  | -5.666715 |
| C | -0.282445 | 0.283745  | -2.669038 |
| H | -0.872527 | 0.513864  | -3.561435 |
| H | -0.824940 | 0.836676  | -1.855951 |
| H | -0.345055 | -0.818533 | -2.568585 |
| C | 1.376243  | 1.575920  | 1.218145  |
| C | 1.075730  | 2.903479  | 0.780663  |
| C | 1.057464  | 3.943029  | 1.716733  |
| H | 0.840587  | 4.947078  | 1.359651  |
| C | 1.269621  | 3.744719  | 3.080185  |
| C | 1.464309  | 2.435115  | 3.500548  |
| H | 1.576206  | 2.229340  | 4.563332  |
| C | 1.489824  | 1.349470  | 2.615821  |
| C | 0.667167  | 3.303259  | -0.623736 |
| H | -0.168840 | 2.691060  | -0.975105 |
| H | 1.475972  | 3.246716  | -1.354493 |
| H | 0.307667  | 4.336076  | -0.609178 |
| C | 1.216744  | 4.893999  | 4.056740  |
| H | 0.178172  | 5.187701  | 4.256723  |
| H | 1.733841  | 5.777771  | 3.665610  |
| H | 1.674335  | 4.627267  | 5.014984  |
| C | 1.576892  | 0.002522  | 3.301639  |

|   |          |           |          |
|---|----------|-----------|----------|
| H | 2.316717 | 0.027677  | 4.108340 |
| H | 1.835156 | -0.822331 | 2.640633 |
| H | 0.602108 | -0.212678 | 3.745863 |

22-TSb

|                                  |                     |         |         |
|----------------------------------|---------------------|---------|---------|
| B3LYP SCF energy:                | -2565.08519741 a.u. |         |         |
| B3LYP enthalpy:                  | -2564.244726 a.u.   |         |         |
| B3LYP free energy:               | -2564.392149 a.u.   |         |         |
| M06 SCF energy in solution:      | -2565.29465562 a.u. |         |         |
| M06 enthalpy in solution:        | -2564.454184 a.u.   |         |         |
| M06 free energy in solution:     | -2564.601607 a.u.   |         |         |
| Three lowest frequencies (cm-1): | -290.4281           | 13.3952 | 16.0378 |
| Imaginary frequency:             | -290.4281 cm-1      |         |         |

Cartesian coordinates

| ATOM | X         | Y         | Z         |
|------|-----------|-----------|-----------|
| C    | -2.402597 | -2.225983 | -1.632544 |
| C    | -2.464480 | -4.677081 | -0.283038 |
| C    | -1.947459 | -2.297357 | -0.287871 |
| C    | -2.863816 | -3.375646 | -2.282416 |
| C    | -2.895215 | -4.598490 | -1.609800 |
| C    | -2.002834 | -3.533439 | 0.371063  |
| H    | -3.171962 | -3.329315 | -3.323727 |
| H    | -3.258900 | -5.485840 | -2.120524 |
| H    | -1.721434 | -3.571070 | 1.418132  |
| H    | -2.504005 | -5.626369 | 0.245299  |
| C    | -2.307269 | -0.918421 | -2.296217 |
| C    | -2.037917 | 1.636792  | -3.305961 |
| C    | -3.075026 | -0.524859 | -3.395298 |
| N    | -1.405669 | -0.060631 | -1.739277 |
| C    | -1.298908 | 1.189797  | -2.216209 |
| C    | -2.935565 | 0.760020  | -3.911442 |
| H    | -3.795595 | -1.216424 | -3.817180 |
| H    | -0.596952 | 1.836727  | -1.705825 |
| H    | -3.536026 | 1.078122  | -4.758591 |
| H    | -1.920134 | 2.658778  | -3.648605 |
| Rh   | -0.421103 | -0.813761 | -0.105109 |
| C    | -2.453610 | -0.944943 | 0.945349  |
| O    | -3.341616 | -0.245117 | 0.377275  |
| O    | -2.197023 | -1.204901 | 2.103488  |
| Al   | -4.397103 | 1.295751  | 0.766426  |
| C    | -6.157638 | 0.887495  | -0.070713 |
| H    | -6.061772 | 0.617762  | -1.132422 |

|   |           |           |           |
|---|-----------|-----------|-----------|
| H | -6.860063 | 1.732623  | -0.022181 |
| H | -6.656146 | 0.042968  | 0.426697  |
| C | -4.336281 | 1.610269  | 2.729451  |
| H | -4.879265 | 0.833636  | 3.286458  |
| H | -4.793644 | 2.572984  | 3.003880  |
| H | -3.311103 | 1.620154  | 3.124472  |
| O | -3.441546 | 2.481514  | -0.178606 |
| C | -3.938198 | 3.674030  | -0.705977 |
| H | -3.294874 | 4.030932  | -1.529887 |
| H | -3.975499 | 4.488067  | 0.041551  |
| H | -4.955951 | 3.571599  | -1.122217 |
| P | 1.665564  | 0.298219  | 0.154884  |
| C | 1.861891  | 2.145682  | 0.272574  |
| C | 0.729526  | 2.884835  | 0.725607  |
| C | 0.757551  | 4.285382  | 0.665714  |
| H | -0.117084 | 4.825610  | 1.021692  |
| C | 1.849078  | 4.996735  | 0.179809  |
| C | 2.965564  | 4.260348  | -0.220589 |
| H | 3.848353  | 4.793027  | -0.567242 |
| C | 3.010218  | 2.862890  | -0.183733 |
| C | -0.536333 | 2.301088  | 1.317548  |
| H | -0.814718 | 2.878363  | 2.207795  |
| H | -0.457434 | 1.257704  | 1.619034  |
| H | -1.390597 | 2.383835  | 0.630506  |
| C | 1.831754  | 6.503100  | 0.086631  |
| H | 1.525941  | 6.831220  | -0.915865 |
| H | 2.822932  | 6.928719  | 0.278021  |
| H | 1.127075  | 6.940544  | 0.801039  |
| C | 4.327135  | 2.247762  | -0.616172 |
| H | 4.255851  | 1.705859  | -1.563455 |
| H | 4.724694  | 1.548408  | 0.122151  |
| H | 5.069477  | 3.040593  | -0.747254 |
| C | 1.531295  | -0.599316 | 1.759622  |
| C | 1.546204  | -0.107944 | 3.091893  |
| C | 1.182821  | -0.985520 | 4.113678  |
| H | 1.201049  | -0.612208 | 5.136013  |
| C | 0.808402  | -2.323244 | 3.899722  |
| C | 0.853981  | -2.807195 | 2.597120  |
| H | 0.621350  | -3.848580 | 2.391553  |
| C | 1.201711  | -1.961143 | 1.536720  |
| C | 1.988875  | 1.287748  | 3.469876  |
| H | 1.200205  | 2.028271  | 3.305977  |
| H | 2.859530  | 1.617320  | 2.895074  |
| H | 2.253414  | 1.320507  | 4.531357  |
| C | 0.371513  | -3.192135 | 5.052850  |

|   |           |           |           |
|---|-----------|-----------|-----------|
| H | 0.465903  | -4.256078 | 4.812676  |
| H | -0.681032 | -3.000771 | 5.298315  |
| H | 0.958880  | -2.991334 | 5.955811  |
| C | 3.081707  | -0.505341 | -0.741458 |
| C | 4.202383  | -1.075819 | -0.083461 |
| C | 5.144422  | -1.785269 | -0.839599 |
| H | 6.000711  | -2.215505 | -0.324166 |
| C | 5.039870  | -1.940156 | -2.221483 |
| C | 3.959855  | -1.326289 | -2.858876 |
| H | 3.871105  | -1.396344 | -3.940931 |
| C | 2.982335  | -0.619254 | -2.153265 |
| C | 4.500345  | -0.937247 | 1.395790  |
| H | 3.984841  | -1.695561 | 1.994555  |
| H | 4.209466  | 0.037723  | 1.794887  |
| H | 5.574913  | -1.057252 | 1.567072  |
| C | 6.056446  | -2.739086 | -3.000640 |
| H | 7.016829  | -2.786664 | -2.476956 |
| H | 6.229453  | -2.309604 | -3.993397 |
| H | 5.713793  | -3.771714 | -3.149927 |
| C | 1.864365  | 0.014519  | -2.947541 |
| H | 2.084158  | -0.030704 | -4.018645 |
| H | 1.713143  | 1.068328  | -2.686655 |
| H | 0.915463  | -0.500865 | -2.770669 |
| H | 1.338740  | -2.398426 | 0.546809  |

23

|                                  |                     |         |         |
|----------------------------------|---------------------|---------|---------|
| B3LYP SCF energy:                | -2166.94063214 a.u. |         |         |
| B3LYP enthalpy:                  | -2166.194691 a.u.   |         |         |
| B3LYP free energy:               | -2166.321282 a.u.   |         |         |
| M06 SCF energy in solution:      | -2167.20438811 a.u. |         |         |
| M06 enthalpy in solution:        | -2166.458447 a.u.   |         |         |
| M06 free energy in solution:     | -2166.585038 a.u.   |         |         |
| Three lowest frequencies (cm-1): | 13.6507             | 15.9603 | 25.4852 |

Cartesian coordinates

| ATOM | X        | Y         | Z         |
|------|----------|-----------|-----------|
| C    | 4.149015 | -0.271282 | 0.225629  |
| C    | 4.583854 | -3.031657 | 0.488172  |
| C    | 3.526402 | -1.163440 | -0.672199 |
| C    | 4.983548 | -0.778855 | 1.237486  |
| C    | 5.183919 | -2.148606 | 1.388467  |
| C    | 3.787080 | -2.535193 | -0.540361 |
| H    | 5.469164 | -0.084074 | 1.918510  |

|    |           |           |           |
|----|-----------|-----------|-----------|
| H  | 5.814423  | -2.520289 | 2.191589  |
| H  | 3.357809  | -3.205249 | -1.278357 |
| H  | 4.750988  | -4.102004 | 0.577487  |
| C  | 4.057451  | 1.208137  | 0.095482  |
| C  | 3.923258  | 3.964439  | -0.093628 |
| C  | 5.236699  | 1.963581  | -0.012770 |
| N  | 2.849530  | 1.817863  | 0.113087  |
| C  | 2.794925  | 3.161370  | 0.012438  |
| C  | 5.174957  | 3.348766  | -0.106861 |
| H  | 6.188395  | 1.444592  | -0.041658 |
| H  | 1.797649  | 3.588098  | 0.015547  |
| H  | 6.084337  | 3.935806  | -0.199249 |
| H  | 3.815218  | 5.041178  | -0.172737 |
| Rh | 0.983390  | 0.768738  | 0.084504  |
| C  | 2.682425  | -0.752394 | -1.875431 |
| O  | 3.012652  | -1.206730 | -2.968556 |
| O  | 1.644038  | 0.008057  | -1.695991 |
| P  | -1.202070 | -0.048316 | 0.016928  |
| C  | -2.241408 | 1.351371  | -0.699262 |
| C  | -1.894959 | 1.769102  | -2.019259 |
| C  | -2.514421 | 2.891798  | -2.576799 |
| H  | -2.236403 | 3.180437  | -3.588627 |
| C  | -3.461228 | 3.648476  | -1.888546 |
| C  | -3.797529 | 3.225631  | -0.606447 |
| H  | -4.545724 | 3.785794  | -0.049773 |
| C  | -3.226959 | 2.097894  | 0.005642  |
| C  | -0.879296 | 1.071565  | -2.896000 |
| H  | -0.901851 | -0.016849 | -2.819253 |
| H  | 0.143541  | 1.355917  | -2.638303 |
| H  | -1.052121 | 1.335331  | -3.944896 |
| C  | -4.116137 | 4.852033  | -2.523110 |
| H  | -4.635524 | 5.464936  | -1.779217 |
| H  | -4.855685 | 4.551343  | -3.277246 |
| H  | -3.380496 | 5.486074  | -3.031535 |
| C  | -3.770009 | 1.790192  | 1.388377  |
| H  | -3.020401 | 1.890648  | 2.177629  |
| H  | -4.176992 | 0.779392  | 1.462771  |
| H  | -4.583651 | 2.484493  | 1.619102  |
| C  | -1.552966 | -1.668389 | -0.837991 |
| C  | -2.568910 | -1.903022 | -1.803814 |
| C  | -2.613910 | -3.143183 | -2.455703 |
| H  | -3.395563 | -3.305296 | -3.195232 |
| C  | -1.714024 | -4.172916 | -2.189810 |
| C  | -0.767617 | -3.951350 | -1.190193 |
| H  | -0.079015 | -4.750458 | -0.923719 |

|   |           |           |           |
|---|-----------|-----------|-----------|
| C | -0.668824 | -2.735591 | -0.506086 |
| C | -3.673725 | -0.934424 | -2.180007 |
| H | -3.343576 | -0.185717 | -2.906681 |
| H | -4.070594 | -0.383042 | -1.325701 |
| H | -4.501067 | -1.488490 | -2.634721 |
| C | -1.761435 | -5.476005 | -2.950158 |
| H | -1.475079 | -6.322266 | -2.315895 |
| H | -1.066642 | -5.458563 | -3.800337 |
| H | -2.761959 | -5.672172 | -3.350226 |
| C | 0.341518  | -2.668274 | 0.617110  |
| H | 1.022683  | -3.522386 | 0.568466  |
| H | -0.154115 | -2.691479 | 1.595795  |
| H | 0.941718  | -1.751064 | 0.585159  |
| C | -1.654934 | -0.317226 | 1.816824  |
| C | -2.684259 | -1.170172 | 2.302174  |
| C | -2.890502 | -1.272349 | 3.682298  |
| H | -3.683505 | -1.927628 | 4.037214  |
| C | -2.140488 | -0.554853 | 4.618088  |
| C | -1.139880 | 0.281764  | 4.130422  |
| H | -0.533834 | 0.854958  | 4.829616  |
| C | -0.872379 | 0.389310  | 2.760401  |
| C | -3.616837 | -1.977692 | 1.424229  |
| H | -3.110335 | -2.828606 | 0.959520  |
| H | -4.046452 | -1.382977 | 0.613927  |
| H | -4.445999 | -2.367217 | 2.023121  |
| C | -2.395604 | -0.700656 | 6.099057  |
| H | -3.468606 | -0.728194 | 6.320159  |
| H | -1.952924 | 0.125338  | 6.665076  |
| H | -1.963054 | -1.633311 | 6.484801  |
| C | 0.316946  | 1.234410  | 2.372702  |
| H | 0.507057  | 2.035862  | 3.095225  |
| H | 0.155467  | 1.831585  | 1.411557  |
| H | 1.228428  | 0.617547  | 2.345856  |

24

|                                  |                                   |
|----------------------------------|-----------------------------------|
| B3LYP SCF energy:                | -2604.43584024 a.u.               |
| B3LYP enthalpy:                  | -2603.563010 a.u.                 |
| B3LYP free energy:               | -2603.713368 a.u.                 |
| M06 SCF energy in solution:      | -2604.62174335 a.u.               |
| M06 enthalpy in solution:        | -2603.748913 a.u.                 |
| M06 free energy in solution:     | -2603.899271 a.u.                 |
| Three lowest frequencies (cm-1): | 10.6600      14.3269      18.2338 |



Cartesian coordinates

| ATOM | X         | Y         | Z         |
|------|-----------|-----------|-----------|
| C    | 2.397516  | 2.462207  | 0.018077  |
| C    | 3.500521  | 3.170026  | 2.509463  |
| C    | 3.203716  | 1.544354  | 0.723652  |
| C    | 2.179532  | 3.733553  | 0.572098  |
| C    | 2.704553  | 4.081388  | 1.816358  |
| C    | 3.762853  | 1.920514  | 1.951267  |
| H    | 1.584597  | 4.455264  | 0.018698  |
| H    | 2.502424  | 5.064764  | 2.231715  |
| H    | 4.414854  | 1.215108  | 2.455027  |
| H    | 3.930012  | 3.435331  | 3.471360  |
| C    | 1.853443  | 2.230799  | -1.356144 |
| C    | 0.768488  | 2.002028  | -3.888121 |
| C    | 2.318254  | 3.045995  | -2.397110 |
| N    | 0.874334  | 1.314859  | -1.580855 |
| C    | 0.346822  | 1.220817  | -2.819427 |
| C    | 1.784486  | 2.930692  | -3.676796 |
| H    | 3.107568  | 3.758456  | -2.184612 |
| H    | -0.449266 | 0.497807  | -2.941255 |
| H    | 2.152921  | 3.553080  | -4.486837 |
| H    | 0.306687  | 1.870416  | -4.860921 |
| Rh   | 0.576189  | -0.224976 | -0.235545 |
| C    | 3.537297  | 0.173455  | 0.193033  |
| O    | 4.713115  | -0.237152 | 0.424468  |
| O    | 2.662444  | -0.496708 | -0.424595 |
| Al   | 5.507833  | -1.991096 | 0.133817  |
| C    | 7.227888  | -1.759543 | 1.113263  |
| H    | 7.851593  | -0.946532 | 0.714649  |
| H    | 7.841461  | -2.671637 | 1.080333  |
| H    | 7.063063  | -1.534001 | 2.177660  |
| C    | 4.193477  | -3.291090 | 0.880333  |
| H    | 3.758640  | -2.948833 | 1.832817  |
| H    | 4.650832  | -4.270737 | 1.079262  |
| H    | 3.366859  | -3.457472 | 0.176897  |
| O    | 5.657013  | -2.168871 | -1.610974 |
| C    | 6.573249  | -1.557811 | -2.464061 |
| H    | 6.210910  | -0.581127 | -2.837514 |
| H    | 6.755004  | -2.187565 | -3.351388 |
| H    | 7.556659  | -1.376171 | -1.994087 |
| P    | -1.704928 | -0.241356 | 0.171780  |
| C    | -2.884386 | -0.164855 | -1.302654 |
| C    | -2.538983 | -1.022041 | -2.396856 |
| C    | -3.278767 | -0.966225 | -3.582698 |
| H    | -2.993151 | -1.627253 | -4.398086 |

|   |           |           |           |
|---|-----------|-----------|-----------|
| C | -4.372697 | -0.116637 | -3.749519 |
| C | -4.740544 | 0.658755  | -2.655557 |
| H | -5.620911 | 1.294247  | -2.732619 |
| C | -4.040177 | 0.652322  | -1.438282 |
| C | -1.436099 | -2.060199 | -2.358297 |
| H | -1.670139 | -2.863575 | -1.651051 |
| H | -0.469296 | -1.640987 | -2.048150 |
| H | -1.311123 | -2.513756 | -3.345966 |
| C | -5.126363 | -0.053357 | -5.055871 |
| H | -4.616216 | 0.601464  | -5.774956 |
| H | -6.138269 | 0.340614  | -4.916403 |
| H | -5.206295 | -1.041952 | -5.521108 |
| C | -4.662514 | 1.533224  | -0.369357 |
| H | -4.393349 | 2.585749  | -0.512849 |
| H | -4.383192 | 1.268398  | 0.645569  |
| H | -5.753380 | 1.470973  | -0.446457 |
| C | -2.083111 | -1.940642 | 0.872692  |
| C | -3.387878 | -2.455317 | 1.095539  |
| C | -3.532655 | -3.771037 | 1.549517  |
| H | -4.538462 | -4.149185 | 1.720346  |
| C | -2.443721 | -4.606922 | 1.810747  |
| C | -1.168283 | -4.079126 | 1.618688  |
| H | -0.295459 | -4.692495 | 1.831339  |
| C | -0.974596 | -2.775682 | 1.148501  |
| C | -4.656801 | -1.652490 | 0.925335  |
| H | -4.910266 | -1.498256 | -0.127710 |
| H | -4.577761 | -0.666132 | 1.389852  |
| H | -5.496539 | -2.171430 | 1.397291  |
| C | -2.643623 | -6.029455 | 2.274000  |
| H | -1.783635 | -6.388308 | 2.848467  |
| H | -2.769973 | -6.706292 | 1.418510  |
| H | -3.538013 | -6.126336 | 2.898786  |
| C | 0.446300  | -2.327222 | 0.937033  |
| H | 1.176219  | -2.907086 | 1.508959  |
| H | 0.620739  | -1.280101 | 1.346055  |
| H | 0.759121  | -2.447358 | -0.113373 |
| C | -2.064998 | 1.101926  | 1.435589  |
| C | -2.238974 | 0.856460  | 2.828674  |
| C | -2.446437 | 1.943475  | 3.690780  |
| H | -2.592421 | 1.735244  | 4.748161  |
| C | -2.461633 | 3.267740  | 3.261621  |
| C | -2.225905 | 3.494444  | 1.907651  |
| H | -2.201095 | 4.517474  | 1.535855  |
| C | -2.006583 | 2.455663  | 0.998850  |
| C | -2.170624 | -0.494809 | 3.515216  |

|   |           |           |           |
|---|-----------|-----------|-----------|
| H | -1.255032 | -1.039199 | 3.269685  |
| H | -3.007355 | -1.152617 | 3.268486  |
| H | -2.179461 | -0.347755 | 4.599126  |
| C | -2.677842 | 4.409109  | 4.225796  |
| H | -3.132643 | 4.063748  | 5.159737  |
| H | -3.327845 | 5.179686  | 3.795808  |
| H | -1.727641 | 4.895503  | 4.483237  |
| C | -1.678728 | 2.897872  | -0.412289 |
| H | -2.251580 | 3.795209  | -0.671097 |
| H | -1.872156 | 2.147948  | -1.176875 |
| H | -0.618405 | 3.159902  | -0.476805 |

25-TS

|                                  |                     |         |         |
|----------------------------------|---------------------|---------|---------|
| B3LYP SCF energy:                | -2604.40374096 a.u. |         |         |
| B3LYP enthalpy:                  | -2603.531385 a.u.   |         |         |
| B3LYP free energy:               | -2603.676253 a.u.   |         |         |
| M06 SCF energy in solution:      | -2604.60877282 a.u. |         |         |
| M06 enthalpy in solution:        | -2603.736417 a.u.   |         |         |
| M06 free energy in solution:     | -2603.881285 a.u.   |         |         |
| Three lowest frequencies (cm-1): | -33.6901            | 14.8047 | 23.0271 |
| Imaginary frequency:             | -33.6901 cm-1       |         |         |

Cartesian coordinates

| ATOM | X        | Y         | Z         |
|------|----------|-----------|-----------|
| C    | 3.282041 | 1.016946  | -0.976901 |
| C    | 3.062741 | 3.684674  | -1.883206 |
| C    | 3.028139 | 2.063979  | -0.061685 |
| C    | 3.450794 | 1.347441  | -2.332798 |
| C    | 3.338837 | 2.660096  | -2.788478 |
| C    | 2.915241 | 3.378550  | -0.533506 |
| H    | 3.673027 | 0.552852  | -3.038729 |
| H    | 3.474434 | 2.878040  | -3.844788 |
| H    | 2.727554 | 4.151340  | 0.204181  |
| H    | 2.979022 | 4.713503  | -2.223084 |
| C    | 3.541474 | -0.419891 | -0.628342 |
| C    | 4.147392 | -3.086406 | -0.197497 |
| C    | 4.832433 | -0.904199 | -0.884870 |
| N    | 2.571413 | -1.255039 | -0.175485 |
| C    | 2.889792 | -2.546678 | 0.042302  |
| C    | 5.146451 | -2.242135 | -0.670132 |
| H    | 5.584680 | -0.208674 | -1.240183 |
| H    | 2.092482 | -3.164253 | 0.435800  |
| H    | 6.150554 | -2.610714 | -0.860077 |

|    |           |           |           |
|----|-----------|-----------|-----------|
| H  | 4.329380  | -4.135901 | 0.007742  |
| Rh | 0.536923  | -0.731910 | 0.236591  |
| C  | 2.905305  | 1.874501  | 1.434537  |
| O  | 3.086447  | 0.639051  | 1.826178  |
| O  | 2.665109  | 2.828087  | 2.163702  |
| Al | 2.223936  | -0.492466 | 2.947767  |
| C  | 1.536201  | 0.349420  | 4.594622  |
| H  | 0.928074  | 1.244027  | 4.418545  |
| H  | 2.388355  | 0.670006  | 5.210293  |
| H  | 0.944546  | -0.346433 | 5.205163  |
| C  | 0.556813  | -1.717495 | 2.283223  |
| O  | 3.381821  | -1.806744 | 3.147083  |
| C  | 4.738848  | -1.659204 | 3.467530  |
| H  | 4.890370  | -1.397726 | 4.528366  |
| H  | 5.234218  | -0.883525 | 2.860729  |
| H  | 5.272048  | -2.606055 | 3.288707  |
| P  | -1.689647 | -0.087283 | -0.104310 |
| C  | -0.766583 | -0.316995 | -1.697492 |
| C  | -0.244812 | -1.649339 | -1.913249 |
| C  | 0.644292  | -1.853895 | -3.004142 |
| H  | 1.019104  | -2.862642 | -3.165881 |
| C  | 0.985854  | -0.856148 | -3.891877 |
| C  | 0.472096  | 0.435681  | -3.660279 |
| H  | 0.756456  | 1.239290  | -4.334889 |
| C  | -0.348765 | 0.740959  | -2.585581 |
| C  | -0.779647 | -2.958876 | -1.340817 |
| H  | -1.384082 | -2.853833 | -0.444082 |
| H  | 0.060579  | -3.619706 | -1.103911 |
| H  | -1.384644 | -3.475243 | -2.099487 |
| C  | 1.871178  | -1.123262 | -5.084727 |
| H  | 1.344635  | -0.909528 | -6.023592 |
| H  | 2.201932  | -2.166049 | -5.114167 |
| H  | 2.765026  | -0.486601 | -5.071582 |
| C  | -0.739459 | 2.193054  | -2.421291 |
| H  | -0.386508 | 2.603373  | -1.471201 |
| H  | -1.819774 | 2.350058  | -2.458286 |
| H  | -0.287348 | 2.785290  | -3.221722 |
| C  | -3.204130 | -1.174728 | 0.092326  |
| C  | -3.890578 | -1.881773 | -0.926817 |
| C  | -4.959604 | -2.721875 | -0.574765 |
| H  | -5.469884 | -3.259767 | -1.372099 |
| C  | -5.393738 | -2.886810 | 0.735921  |
| C  | -4.729134 | -2.158603 | 1.726271  |
| H  | -5.053674 | -2.248910 | 2.760902  |
| C  | -3.657532 | -1.312323 | 1.438244  |

|   |           |           |           |
|---|-----------|-----------|-----------|
| C | -3.623795 | -1.801093 | -2.419004 |
| H | -3.506668 | -2.806431 | -2.838908 |
| H | -2.742126 | -1.224049 | -2.685032 |
| H | -4.484436 | -1.348190 | -2.926523 |
| C | -6.532415 | -3.815417 | 1.083328  |
| H | -6.174399 | -4.688860 | 1.643430  |
| H | -7.039032 | -4.182197 | 0.185023  |
| H | -7.278376 | -3.315389 | 1.712508  |
| C | -3.058187 | -0.542907 | 2.594509  |
| H | -1.966439 | -0.574463 | 2.592390  |
| H | -3.402087 | -0.957021 | 3.546862  |
| H | -3.353172 | 0.512721  | 2.565400  |
| C | -2.380685 | 1.629299  | 0.157492  |
| C | -3.545789 | 2.097164  | -0.513582 |
| C | -4.053514 | 3.362488  | -0.207351 |
| H | -4.937729 | 3.707367  | -0.739627 |
| C | -3.461762 | 4.201265  | 0.739751  |
| C | -2.311048 | 3.740320  | 1.372273  |
| H | -1.810961 | 4.377386  | 2.098092  |
| C | -1.757818 | 2.478463  | 1.109266  |
| C | -4.276092 | 1.326974  | -1.589680 |
| H | -4.917241 | 0.547236  | -1.166681 |
| H | -3.592679 | 0.841756  | -2.290199 |
| H | -4.913441 | 2.003773  | -2.167193 |
| C | -4.053350 | 5.551710  | 1.063921  |
| H | -4.881708 | 5.457442  | 1.778792  |
| H | -4.454345 | 6.039432  | 0.168370  |
| H | -3.309060 | 6.217915  | 1.511583  |
| C | -0.515987 | 2.118345  | 1.883680  |
| H | 0.198732  | 1.551489  | 1.280932  |
| H | -0.752784 | 1.495830  | 2.754191  |
| H | -0.007455 | 3.013252  | 2.249099  |
| H | -0.168721 | -1.381227 | 3.026700  |
| H | 0.025301  | -2.425900 | 1.628725  |
| H | 1.274354  | -2.392398 | 2.782420  |

26

|                              |                     |
|------------------------------|---------------------|
| B3LYP SCF energy:            | -1064.91197057 a.u. |
| B3LYP enthalpy:              | -1064.638523 a.u.   |
| B3LYP free energy:           | -1064.709942 a.u.   |
| M06 SCF energy in solution:  | -1064.58973032 a.u. |
| M06 enthalpy in solution:    | -1064.316283 a.u.   |
| M06 free energy in solution: | -1064.387702 a.u.   |

Three lowest frequencies (cm-1):            19.9051            26.5192            30.6694

Cartesian coordinates

| ATOM | X         | Y         | Z         |
|------|-----------|-----------|-----------|
| C    | 1.916612  | 0.721577  | 0.068088  |
| C    | 1.925753  | 3.530796  | -0.223884 |
| C    | 0.718299  | 1.425442  | -0.186531 |
| C    | 3.100831  | 1.459125  | 0.193728  |
| C    | 3.108673  | 2.848350  | 0.060433  |
| C    | 0.736318  | 2.816870  | -0.352071 |
| H    | 4.034359  | 0.929433  | 0.360329  |
| H    | 4.043854  | 3.392725  | 0.158952  |
| H    | -0.197903 | 3.327947  | -0.559172 |
| H    | 1.927324  | 4.610144  | -0.343376 |
| C    | 1.979039  | -0.766312 | 0.101472  |
| C    | 2.119517  | -3.504530 | 0.024145  |
| C    | 2.720229  | -1.437831 | 1.084255  |
| N    | 1.330237  | -1.415879 | -0.881448 |
| C    | 1.404715  | -2.748645 | -0.907959 |
| C    | 2.788934  | -2.828934 | 1.042802  |
| H    | 3.211646  | -0.879096 | 1.874579  |
| H    | 0.867936  | -3.238294 | -1.718821 |
| H    | 3.349167  | -3.374154 | 1.797565  |
| H    | 2.144507  | -4.587472 | -0.049260 |
| C    | -0.609265 | 0.772550  | -0.197907 |
| O    | -1.566603 | 1.227713  | -0.927902 |
| O    | -0.910110 | -0.215606 | 0.562091  |
| Al   | -2.676763 | -0.160547 | -0.197555 |
| C    | -3.100024 | -1.633103 | -1.414418 |
| H    | -3.896378 | -1.367074 | -2.121096 |
| H    | -3.434236 | -2.528975 | -0.875507 |
| H    | -2.220311 | -1.916247 | -2.005124 |
| O    | -3.792624 | 0.510945  | 0.915237  |
| C    | -5.103082 | 0.195049  | 1.301999  |
| H    | -5.770536 | 1.051239  | 1.127476  |
| H    | -5.139555 | -0.041613 | 2.375288  |
| H    | -5.518213 | -0.667132 | 0.756203  |

27-TS

|                             |                     |
|-----------------------------|---------------------|
| B3LYP SCF energy:           | -2250.58810473 a.u. |
| B3LYP enthalpy:             | -2249.983268 a.u.   |
| B3LYP free energy:          | -2250.101984 a.u.   |
| M06 SCF energy in solution: | -2250.95699638 a.u. |

M06 enthalpy in solution: -2250.352160 a.u.  
 M06 free energy in solution: -2250.470876 a.u.  
 Three lowest frequencies (cm-1): -308.5354 16.5074 21.5849  
 Imaginary frequency: -308.5354 cm-1

Cartesian coordinates

| ATOM | X         | Y         | Z         |
|------|-----------|-----------|-----------|
| C    | 2.072397  | -2.416838 | -1.015285 |
| C    | 0.516846  | -3.175869 | -3.217898 |
| C    | 0.974924  | -1.595185 | -1.411057 |
| C    | 2.377587  | -3.582150 | -1.726740 |
| C    | 1.603814  | -3.962322 | -2.823690 |
| C    | 0.219392  | -2.003319 | -2.527181 |
| H    | 3.197209  | -4.218387 | -1.403162 |
| H    | 1.849876  | -4.868884 | -3.369555 |
| H    | -0.558632 | -1.336509 | -2.883806 |
| H    | -0.079543 | -3.465342 | -4.079181 |
| C    | 2.789236  | -2.037616 | 0.211106  |
| C    | 3.903063  | -1.170916 | 2.582191  |
| C    | 4.104989  | -2.393884 | 0.522522  |
| N    | 2.056305  | -1.281755 | 1.066447  |
| C    | 2.598007  | -0.855723 | 2.214741  |
| C    | 4.666775  | -1.956374 | 1.718265  |
| H    | 4.684894  | -2.981950 | -0.180095 |
| H    | 1.960536  | -0.243552 | 2.844333  |
| H    | 5.692747  | -2.212030 | 1.966189  |
| H    | 4.308353  | -0.795060 | 3.515445  |
| Rh   | 0.149173  | -0.752364 | 0.339413  |
| C    | 1.235508  | 0.256720  | -1.539682 |
| O    | 2.386201  | 0.575107  | -1.114985 |
| O    | 0.442365  | 0.785535  | -2.285617 |
| Al   | 3.085477  | 2.388800  | -1.054226 |
| C    | 4.790081  | 2.111577  | -0.054894 |
| H    | 4.653586  | 1.638089  | 0.928318  |
| H    | 5.331124  | 3.052717  | 0.121617  |
| H    | 5.473585  | 1.463100  | -0.622497 |
| C    | 3.177267  | 3.026485  | -2.928481 |
| H    | 3.829690  | 2.398180  | -3.552090 |
| H    | 3.574795  | 4.050263  | -2.988381 |
| H    | 2.189183  | 3.036005  | -3.406287 |
| O    | 1.835748  | 3.235080  | -0.104774 |
| C    | 1.931988  | 3.652105  | 1.223640  |
| H    | 1.862676  | 4.750865  | 1.306779  |
| H    | 2.876469  | 3.351916  | 1.708967  |
| H    | 1.111574  | 3.234568  | 1.836328  |

|   |           |           |           |
|---|-----------|-----------|-----------|
| P | -1.957785 | 0.099013  | 0.060402  |
| C | -2.370774 | 1.766859  | -0.560617 |
| C | -1.344254 | 2.725003  | -0.646310 |
| C | -3.673953 | 2.108352  | -0.959315 |
| C | -1.634165 | 4.012080  | -1.099940 |
| H | -0.313519 | 2.496165  | -0.388535 |
| C | -3.949749 | 3.395537  | -1.421079 |
| H | -4.472104 | 1.374541  | -0.916579 |
| C | -2.932021 | 4.349862  | -1.487879 |
| H | -0.825467 | 4.734009  | -1.161198 |
| H | -4.959959 | 3.649497  | -1.731104 |
| H | -3.149709 | 5.350788  | -1.851510 |
| C | -3.471064 | -0.926777 | -0.096683 |
| C | -4.565577 | -0.774292 | 0.771219  |
| C | -3.526742 | -1.900544 | -1.104971 |
| C | -5.697163 | -1.576988 | 0.624119  |
| H | -4.531926 | -0.029916 | 1.562006  |
| C | -4.663523 | -2.696995 | -1.254035 |
| H | -2.675352 | -2.042425 | -1.764081 |
| C | -5.748564 | -2.536446 | -0.390482 |
| H | -6.537742 | -1.453930 | 1.301636  |
| H | -4.697297 | -3.446872 | -2.039524 |
| H | -6.630748 | -3.160725 | -0.503371 |
| C | -1.589635 | 0.218215  | 1.856242  |
| C | -1.278012 | -1.012083 | 2.490910  |
| C | -1.345874 | 1.426096  | 2.547242  |
| C | -0.757814 | -1.017825 | 3.799100  |
| H | -1.554079 | -1.954617 | 2.023774  |
| C | -0.843451 | 1.402292  | 3.841375  |
| H | -1.557110 | 2.372784  | 2.060820  |
| C | -0.543752 | 0.180017  | 4.468747  |
| H | -0.542537 | -1.966093 | 4.283763  |
| H | -0.677600 | 2.336746  | 4.369994  |
| H | -0.153569 | 0.175040  | 5.482983  |

27-TSa

|                                  |                     |         |         |
|----------------------------------|---------------------|---------|---------|
| B3LYP SCF energy:                | -2250.59681684 a.u. |         |         |
| B3LYP enthalpy:                  | -2249.991568 a.u.   |         |         |
| B3LYP free energy:               | -2250.111681 a.u.   |         |         |
| M06 SCF energy in solution:      | -2250.95269775 a.u. |         |         |
| M06 enthalpy in solution:        | -2250.347449 a.u.   |         |         |
| M06 free energy in solution:     | -2250.467562 a.u.   |         |         |
| Three lowest frequencies (cm-1): | -262.7007           | 10.9920 | 21.8072 |



Imaginary frequency:

-262.7007 cm<sup>-1</sup>

Cartesian coordinates

| ATOM | X         | Y         | Z         |
|------|-----------|-----------|-----------|
| C    | 2.742696  | -2.165406 | -0.486092 |
| C    | 3.442754  | -2.462223 | -3.193727 |
| C    | 2.234332  | -1.256781 | -1.455225 |
| C    | 3.604012  | -3.190333 | -0.892961 |
| C    | 3.972932  | -3.323894 | -2.233724 |
| C    | 2.568395  | -1.445906 | -2.805380 |
| H    | 3.951778  | -3.923528 | -0.170606 |
| H    | 4.653174  | -4.118600 | -2.526756 |
| H    | 2.169619  | -0.751864 | -3.538116 |
| H    | 3.710334  | -2.577850 | -4.240287 |
| C    | 2.211244  | -2.142088 | 0.892917  |
| C    | 1.029964  | -2.133046 | 3.388056  |
| C    | 2.927647  | -2.599969 | 2.001640  |
| N    | 0.934575  | -1.672177 | 1.032481  |
| C    | 0.366062  | -1.681098 | 2.252281  |
| C    | 2.338913  | -2.594318 | 3.263022  |
| H    | 3.950246  | -2.934803 | 1.868756  |
| H    | -0.650625 | -1.314791 | 2.307336  |
| H    | 2.894788  | -2.936407 | 4.130674  |
| H    | 0.524346  | -2.106206 | 4.347331  |
| Rh   | 0.312114  | -0.652968 | -0.648990 |
| C    | 1.935083  | 0.478743  | -1.233912 |
| O    | 2.859321  | 1.025684  | -0.585461 |
| O    | 1.100597  | 0.916781  | -2.074320 |
| Al   | 3.170289  | 2.819823  | 0.130292  |
| C    | 5.156602  | 2.862062  | 0.209497  |
| H    | 5.587234  | 2.027596  | 0.781063  |
| H    | 5.529194  | 3.787390  | 0.672370  |
| H    | 5.600195  | 2.816130  | -0.795558 |
| C    | 2.203707  | 4.099167  | -1.033599 |
| H    | 2.518874  | 4.027388  | -2.083862 |
| H    | 2.386208  | 5.136915  | -0.718414 |
| H    | 1.116612  | 3.946820  | -1.015601 |
| O    | 2.372537  | 2.680980  | 1.714765  |
| C    | 2.893459  | 2.037617  | 2.841128  |
| H    | 2.672065  | 0.953868  | 2.844102  |
| H    | 2.452616  | 2.455906  | 3.761262  |
| H    | 3.987933  | 2.142003  | 2.932060  |
| P    | -1.857443 | 0.043290  | -0.084561 |
| C    | -2.848846 | 0.316049  | -1.615563 |
| C    | -2.251262 | 1.057872  | -2.650272 |

|   |           |           |           |
|---|-----------|-----------|-----------|
| C | -4.155171 | -0.166745 | -1.782149 |
| C | -2.956751 | 1.313057  | -3.825907 |
| H | -1.236226 | 1.428539  | -2.538219 |
| C | -4.853762 | 0.089049  | -2.964453 |
| H | -4.629783 | -0.743480 | -0.994585 |
| C | -4.257213 | 0.828325  | -3.986725 |
| H | -2.485761 | 1.888314  | -4.618197 |
| H | -5.865317 | -0.290293 | -3.083441 |
| H | -4.802765 | 1.025602  | -4.905675 |
| C | -2.839479 | -1.178328 | 0.888517  |
| C | -3.543456 | -0.853606 | 2.057574  |
| C | -2.828672 | -2.515748 | 0.451480  |
| C | -4.229089 | -1.843775 | 2.767865  |
| H | -3.557883 | 0.170708  | 2.415731  |
| C | -3.522540 | -3.498440 | 1.155427  |
| H | -2.269597 | -2.785240 | -0.441684 |
| C | -4.223722 | -3.164196 | 2.317997  |
| H | -4.769192 | -1.577712 | 3.672578  |
| H | -3.509483 | -4.525836 | 0.801771  |
| H | -4.758817 | -3.931393 | 2.871026  |
| C | -1.965392 | 1.640153  | 0.812013  |
| C | -0.797986 | 2.195681  | 1.353721  |
| C | -3.180717 | 2.341106  | 0.923999  |
| C | -0.843013 | 3.428116  | 2.010989  |
| H | 0.165660  | 1.707681  | 1.245743  |
| C | -3.223127 | 3.563382  | 1.592240  |
| H | -4.086374 | 1.939755  | 0.476955  |
| C | -2.054238 | 4.107166  | 2.137303  |
| H | 0.087758  | 3.839986  | 2.387749  |
| H | -4.165107 | 4.099397  | 1.674920  |
| H | -2.090785 | 5.068321  | 2.643635  |

28

|                                  |                     |         |         |
|----------------------------------|---------------------|---------|---------|
| B3LYP SCF energy:                | -2312.35771513 a.u. |         |         |
| B3LYP enthalpy:                  | -2311.531782 a.u.   |         |         |
| B3LYP free energy:               | -2311.676381 a.u.   |         |         |
| M06 SCF energy in solution:      | -2474.18250815 a.u. |         |         |
| M06 enthalpy in solution:        | -2473.356575 a.u.   |         |         |
| M06 free energy in solution:     | -2473.501174 a.u.   |         |         |
| Three lowest frequencies (cm-1): | 13.4390             | 21.2111 | 24.5122 |

Cartesian coordinates

| ATOM | X | Y | Z |
|------|---|---|---|
|------|---|---|---|

|    |           |           |           |
|----|-----------|-----------|-----------|
| C  | 1.091199  | 3.901107  | 0.238254  |
| C  | -1.281112 | 4.479549  | 1.573771  |
| C  | 0.134641  | 2.859000  | 0.414738  |
| C  | 0.855546  | 5.191629  | 0.738698  |
| C  | -0.325688 | 5.484289  | 1.411698  |
| C  | -1.050868 | 3.191406  | 1.080947  |
| H  | 1.596794  | 5.974766  | 0.603255  |
| H  | -0.501104 | 6.483885  | 1.799298  |
| H  | -1.823713 | 2.447340  | 1.217227  |
| H  | -2.214734 | 4.694587  | 2.088651  |
| C  | 2.306184  | 3.555998  | -0.499234 |
| C  | 4.476011  | 2.611487  | -1.948654 |
| C  | 3.370656  | 4.416206  | -0.803508 |
| N  | 2.344723  | 2.263435  | -0.918494 |
| C  | 3.396703  | 1.801736  | -1.615129 |
| C  | 4.457230  | 3.943627  | -1.530507 |
| H  | 3.344698  | 5.446967  | -0.469412 |
| H  | 3.369537  | 0.752058  | -1.883745 |
| H  | 5.284299  | 4.607579  | -1.765725 |
| H  | 5.306506  | 2.197348  | -2.509601 |
| Rh | 0.684982  | 1.095539  | -0.388863 |
| C  | 2.029595  | 0.113244  | 0.801260  |
| O  | 2.299339  | -0.776398 | -0.049796 |
| O  | 2.390572  | 0.462610  | 1.896591  |
| P  | -1.194238 | -0.463020 | 0.007297  |
| C  | -2.896677 | 0.297264  | 0.337461  |
| C  | -3.302718 | 1.271500  | -0.631529 |
| C  | -4.517671 | 1.942312  | -0.477526 |
| H  | -4.798626 | 2.677457  | -1.228393 |
| C  | -5.376864 | 1.709021  | 0.597539  |
| C  | -4.986778 | 0.743060  | 1.515399  |
| H  | -5.644198 | 0.513940  | 2.352093  |
| C  | -3.782643 | 0.023742  | 1.414265  |
| C  | -2.500119 | 1.644426  | -1.860504 |
| H  | -2.988356 | 2.469414  | -2.387577 |
| H  | -2.409520 | 0.809435  | -2.561353 |
| H  | -1.487295 | 1.977803  | -1.605474 |
| C  | -6.668931 | 2.475198  | 0.747161  |
| H  | -7.238415 | 2.485833  | -0.189676 |
| H  | -6.479700 | 3.521781  | 1.019149  |
| H  | -7.304584 | 2.040809  | 1.525136  |
| C  | -3.607305 | -1.011603 | 2.511859  |
| H  | -3.358096 | -0.530388 | 3.464999  |
| H  | -2.837919 | -1.748777 | 2.314440  |
| H  | -4.554535 | -1.541748 | 2.660721  |

|    |           |           |           |
|----|-----------|-----------|-----------|
| C  | -1.627474 | -1.479968 | -1.535580 |
| C  | -2.764102 | -2.336518 | -1.558068 |
| C  | -3.148201 | -2.950503 | -2.756324 |
| H  | -4.018610 | -3.603240 | -2.742679 |
| C  | -2.452463 | -2.775675 | -3.950514 |
| C  | -1.306496 | -1.985528 | -3.903745 |
| H  | -0.711434 | -1.864164 | -4.806105 |
| C  | -0.876736 | -1.343855 | -2.734665 |
| C  | -3.586354 | -2.709832 | -0.344773 |
| H  | -4.343789 | -1.955367 | -0.113278 |
| H  | -2.969381 | -2.845781 | 0.544911  |
| H  | -4.107509 | -3.654375 | -0.529524 |
| C  | -2.915341 | -3.419218 | -5.234800 |
| H  | -2.075445 | -3.621878 | -5.907586 |
| H  | -3.613986 | -2.764954 | -5.773446 |
| H  | -3.436592 | -4.363591 | -5.045114 |
| C  | 0.410578  | -0.561710 | -2.857701 |
| H  | 0.886109  | -0.763421 | -3.823153 |
| H  | 1.134853  | -0.832010 | -2.082391 |
| H  | 0.241827  | 0.523165  | -2.810566 |
| C  | -0.607032 | -1.604779 | 1.379699  |
| C  | -0.152409 | -2.937724 | 1.161893  |
| C  | 0.310510  | -3.681347 | 2.254858  |
| H  | 0.644215  | -4.700410 | 2.073531  |
| C  | 0.398017  | -3.166745 | 3.546557  |
| C  | 0.021286  | -1.839183 | 3.726581  |
| H  | 0.118167  | -1.388503 | 4.711573  |
| C  | -0.450148 | -1.041671 | 2.679048  |
| C  | -0.038272 | -3.636486 | -0.179178 |
| H  | 0.479469  | -3.017293 | -0.915196 |
| H  | -1.001112 | -3.920811 | -0.610330 |
| H  | 0.548117  | -4.551582 | -0.055067 |
| C  | 0.950417  | -3.995192 | 4.680014  |
| H  | 0.692204  | -3.566840 | 5.653884  |
| H  | 2.045138  | -4.047043 | 4.618480  |
| H  | 0.573711  | -5.023991 | 4.647589  |
| C  | -0.709125 | 0.408600  | 3.015635  |
| H  | -0.793334 | 0.534075  | 4.099832  |
| H  | -1.616536 | 0.809520  | 2.566419  |
| H  | 0.128912  | 1.024428  | 2.675374  |
| Zn | 4.221260  | -2.087435 | 0.005530  |
| C  | 4.177498  | -3.030174 | 1.816242  |
| H  | 3.469299  | -3.869349 | 1.811763  |
| H  | 5.161939  | -3.427382 | 2.096614  |
| H  | 3.855741  | -2.332276 | 2.598638  |

|   |          |           |           |
|---|----------|-----------|-----------|
| C | 4.975018 | -1.636141 | -1.852838 |
| H | 5.510208 | -0.675453 | -1.853337 |
| H | 5.691949 | -2.395569 | -2.192529 |
| H | 4.186681 | -1.573942 | -2.616523 |

29-TS

|                                  |                     |         |         |
|----------------------------------|---------------------|---------|---------|
| B3LYP SCF energy:                | -2312.31720313 a.u. |         |         |
| B3LYP enthalpy:                  | -2311.493845 a.u.   |         |         |
| B3LYP free energy:               | -2311.639085 a.u.   |         |         |
| M06 SCF energy in solution:      | -2474.14558256 a.u. |         |         |
| M06 enthalpy in solution:        | -2473.322224 a.u.   |         |         |
| M06 free energy in solution:     | -2473.467464 a.u.   |         |         |
| Three lowest frequencies (cm-1): | -255.4585           | 12.1213 | 18.2612 |
| Imaginary frequency:             | -255.4585 cm-1      |         |         |

Cartesian coordinates

| ATOM | X         | Y         | Z         |
|------|-----------|-----------|-----------|
| C    | -2.525463 | 2.593150  | 0.553685  |
| C    | -2.687188 | 4.252937  | -1.686616 |
| C    | -2.178528 | 2.067473  | -0.721863 |
| C    | -2.937451 | 3.921552  | 0.696639  |
| C    | -3.019848 | 4.750781  | -0.423566 |
| C    | -2.278205 | 2.926660  | -1.830638 |
| H    | -3.161562 | 4.324020  | 1.681483  |
| H    | -3.343954 | 5.781614  | -0.310051 |
| H    | -2.082460 | 2.521615  | -2.819033 |
| H    | -2.764376 | 4.895490  | -2.560087 |
| C    | -2.369647 | 1.680809  | 1.691167  |
| C    | -2.007796 | -0.214277 | 3.659638  |
| C    | -3.110421 | 1.762155  | 2.874784  |
| N    | -1.444436 | 0.693635  | 1.510853  |
| C    | -1.284116 | -0.231288 | 2.472729  |
| C    | -2.932923 | 0.808394  | 3.869926  |
| H    | -3.843181 | 2.553662  | 2.985705  |
| H    | -0.549752 | -1.001199 | 2.280159  |
| H    | -3.516323 | 0.851855  | 4.784950  |
| H    | -1.844066 | -0.995269 | 4.394358  |
| Rh   | -0.528089 | 0.733404  | -0.333059 |
| C    | -2.892598 | 0.381904  | -1.213349 |
| O    | -3.640922 | -0.007963 | -0.313676 |
| O    | -2.665472 | 0.116257  | -2.380006 |
| P    | 1.697206  | -0.214511 | -0.008824 |
| C    | 1.888493  | -1.557363 | 1.270231  |

|   |           |           |           |
|---|-----------|-----------|-----------|
| C | 0.914206  | -2.600016 | 1.212629  |
| C | 0.906504  | -3.589084 | 2.204730  |
| H | 0.155567  | -4.373363 | 2.141931  |
| C | 1.825837  | -3.607403 | 3.252880  |
| C | 2.802435  | -2.611902 | 3.264082  |
| H | 3.560633  | -2.628670 | 4.044194  |
| C | 2.868670  | -1.596833 | 2.300271  |
| C | -0.103245 | -2.749078 | 0.102071  |
| H | 0.370157  | -3.089262 | -0.826709 |
| H | -0.613961 | -1.806202 | -0.137328 |
| H | -0.868250 | -3.480292 | 0.375736  |
| C | 1.768485  | -4.662509 | 4.331170  |
| H | 2.765307  | -4.888673 | 4.724835  |
| H | 1.328557  | -5.593231 | 3.958246  |
| H | 1.153552  | -4.328836 | 5.177889  |
| C | 4.050859  | -0.655181 | 2.421403  |
| H | 3.772642  | 0.334602  | 2.794745  |
| H | 4.559012  | -0.495397 | 1.467228  |
| H | 4.780306  | -1.075222 | 3.120596  |
| C | 2.091985  | -1.005266 | -1.656395 |
| C | 2.908749  | -2.144749 | -1.872439 |
| C | 3.052785  | -2.633200 | -3.179138 |
| H | 3.676324  | -3.511282 | -3.333052 |
| C | 2.447126  | -2.038093 | -4.285402 |
| C | 1.671450  | -0.899448 | -4.059365 |
| H | 1.190533  | -0.402910 | -4.899314 |
| C | 1.476395  | -0.391212 | -2.774091 |
| C | 3.683094  | -2.882610 | -0.799227 |
| H | 3.037092  | -3.513060 | -0.180639 |
| H | 4.209800  | -2.207967 | -0.119452 |
| H | 4.430643  | -3.531463 | -1.265854 |
| C | 2.605156  | -2.614114 | -5.671559 |
| H | 2.617013  | -1.827617 | -6.433822 |
| H | 1.771589  | -3.286716 | -5.913387 |
| H | 3.529726  | -3.193478 | -5.762902 |
| C | 0.575379  | 0.809744  | -2.621653 |
| H | 0.301589  | 1.241205  | -3.589623 |
| H | 1.012997  | 1.625624  | -2.032855 |
| H | -0.431074 | 0.472835  | -2.253271 |
| C | 2.901657  | 1.208801  | 0.265778  |
| C | 4.015405  | 1.524769  | -0.564756 |
| C | 4.702359  | 2.730766  | -0.356261 |
| H | 5.547250  | 2.954896  | -1.003587 |
| C | 4.369809  | 3.636664  | 0.646830  |
| C | 3.319071  | 3.285184  | 1.491881  |

|    |           |           |           |
|----|-----------|-----------|-----------|
| H  | 3.056117  | 3.945284  | 2.315962  |
| C  | 2.581956  | 2.109883  | 1.322425  |
| C  | 4.597496  | 0.649195  | -1.657858 |
| H  | 3.963886  | 0.592936  | -2.546834 |
| H  | 4.771722  | -0.374480 | -1.321782 |
| H  | 5.563628  | 1.057455  | -1.969192 |
| C  | 5.115464  | 4.937975  | 0.815139  |
| H  | 6.126932  | 4.878244  | 0.399779  |
| H  | 5.195657  | 5.220846  | 1.870499  |
| H  | 4.598028  | 5.757671  | 0.298960  |
| C  | 1.473597  | 1.878563  | 2.324481  |
| H  | 1.663225  | 2.461259  | 3.232082  |
| H  | 1.368981  | 0.832116  | 2.621432  |
| H  | 0.510360  | 2.195028  | 1.914473  |
| Zn | -5.094947 | -1.731915 | -0.567034 |
| C  | -6.794044 | -0.833544 | -1.274043 |
| H  | -6.615465 | -0.363763 | -2.250716 |
| H  | -7.623471 | -1.542682 | -1.397616 |
| H  | -7.138070 | -0.041109 | -0.594894 |
| C  | -4.010659 | -3.330121 | 0.139307  |
| H  | -4.632484 | -4.215638 | 0.326993  |
| H  | -3.234059 | -3.624215 | -0.580518 |
| H  | -3.503494 | -3.076500 | 1.080858  |

### 30-TS

|                                  |                     |         |         |
|----------------------------------|---------------------|---------|---------|
| B3LYP SCF energy:                | -2627.71787041 a.u. |         |         |
| B3LYP enthalpy:                  | -2626.959470 a.u.   |         |         |
| B3LYP free energy:               | -2627.087048 a.u.   |         |         |
| M06 SCF energy in solution:      | -2627.98800894 a.u. |         |         |
| M06 enthalpy in solution:        | -2627.229609 a.u.   |         |         |
| M06 free energy in solution:     | -2627.357187 a.u.   |         |         |
| Three lowest frequencies (cm-1): | -291.3001           | 20.4745 | 23.8520 |
| Imaginary frequency:             | -291.3001 cm-1      |         |         |

### Cartesian coordinates

| ATOM | X         | Y         | Z         |
|------|-----------|-----------|-----------|
| C    | -4.208271 | 0.092161  | -0.049494 |
| C    | -5.166805 | -2.408862 | -0.855575 |
| C    | -3.501472 | -0.631785 | -1.050790 |
| C    | -5.376911 | -0.421639 | 0.521281  |
| C    | -5.857726 | -1.664441 | 0.108384  |
| C    | -3.997835 | -1.905104 | -1.414060 |
| H    | -5.890982 | 0.118131  | 1.312149  |

|    |           |           |           |
|----|-----------|-----------|-----------|
| H  | -6.764262 | -2.063841 | 0.555507  |
| H  | -3.455582 | -2.486671 | -2.151418 |
| H  | -5.539484 | -3.384081 | -1.156551 |
| C  | -3.623122 | 1.370542  | 0.378587  |
| C  | -2.373338 | 3.721361  | 1.082910  |
| C  | -4.379837 | 2.432370  | 0.888895  |
| N  | -2.272784 | 1.477231  | 0.226916  |
| C  | -1.677725 | 2.630397  | 0.570122  |
| C  | -3.753116 | 3.619799  | 1.248305  |
| H  | -5.455170 | 2.323359  | 0.973088  |
| H  | -0.607279 | 2.677693  | 0.435440  |
| H  | -4.332002 | 4.452274  | 1.637709  |
| H  | -1.831337 | 4.625791  | 1.337600  |
| Rh | -1.370426 | -0.333165 | -0.521452 |
| C  | -3.058838 | 0.344775  | -2.541820 |
| O  | -4.065068 | 0.602158  | -3.153992 |
| O  | -1.839785 | 0.556642  | -2.625905 |
| P  | 1.072405  | -0.156085 | 0.088416  |
| C  | 1.663480  | 1.591217  | 0.601137  |
| C  | 1.535759  | 2.576629  | -0.434812 |
| C  | 1.921212  | 3.899532  | -0.196976 |
| H  | 1.805015  | 4.619149  | -1.004485 |
| C  | 2.442075  | 4.328255  | 1.024018  |
| C  | 2.573787  | 3.366978  | 2.015942  |
| H  | 2.986958  | 3.657432  | 2.980485  |
| C  | 2.214071  | 2.018280  | 1.842138  |
| C  | 0.995759  | 2.305727  | -1.823191 |
| H  | 1.709634  | 1.733426  | -2.422064 |
| H  | 0.052128  | 1.755272  | -1.830022 |
| H  | 0.818781  | 3.252293  | -2.342413 |
| C  | 2.867253  | 5.760581  | 1.239524  |
| H  | 2.149833  | 6.462813  | 0.799722  |
| H  | 2.964025  | 5.994490  | 2.304646  |
| H  | 3.839376  | 5.959093  | 0.769202  |
| C  | 2.512760  | 1.178921  | 3.073171  |
| H  | 1.876795  | 1.493186  | 3.908719  |
| H  | 2.379819  | 0.113171  | 2.939728  |
| H  | 3.549510  | 1.350212  | 3.384378  |
| C  | 2.498699  | -0.519689 | -1.119627 |
| C  | 3.847187  | -0.493643 | -0.643129 |
| C  | 4.906596  | -0.674288 | -1.535963 |
| H  | 5.919889  | -0.657915 | -1.139608 |
| C  | 4.716355  | -0.877614 | -2.902502 |
| C  | 3.404659  | -0.905872 | -3.353215 |
| H  | 3.213502  | -1.068841 | -4.411476 |



|    |           |           |           |
|----|-----------|-----------|-----------|
| C  | 2.292465  | -0.736906 | -2.508967 |
| C  | 4.266607  | -0.303574 | 0.798076  |
| H  | 4.286782  | 0.755797  | 1.069936  |
| H  | 3.615033  | -0.818273 | 1.503584  |
| H  | 5.278136  | -0.695610 | 0.942343  |
| C  | 5.886228  | -1.045953 | -3.841248 |
| H  | 6.427966  | -0.100161 | -3.973551 |
| H  | 6.606761  | -1.776766 | -3.455192 |
| H  | 5.559873  | -1.381996 | -4.830417 |
| C  | 0.965440  | -0.831069 | -3.222940 |
| H  | 1.075962  | -0.469618 | -4.251137 |
| H  | 0.162651  | -0.269377 | -2.761338 |
| C  | 1.122380  | -1.406637 | 1.503808  |
| C  | 1.703950  | -2.702350 | 1.371684  |
| C  | 1.619249  | -3.595039 | 2.449674  |
| H  | 2.073663  | -4.576070 | 2.331638  |
| C  | 0.965239  | -3.298711 | 3.642458  |
| C  | 0.341163  | -2.057681 | 3.726391  |
| H  | -0.217199 | -1.801595 | 4.625141  |
| C  | 0.383959  | -1.122473 | 2.687450  |
| C  | 2.385853  | -3.263862 | 0.138548  |
| H  | 1.828762  | -3.042481 | -0.771075 |
| H  | 3.407651  | -2.895348 | 0.011303  |
| H  | 2.440754  | -4.352685 | 0.231079  |
| C  | 0.931930  | -4.280712 | 4.788389  |
| H  | 0.051332  | -4.127671 | 5.421242  |
| H  | 0.916620  | -5.314982 | 4.428176  |
| H  | 1.817682  | -4.173250 | 5.429274  |
| C  | -0.428808 | 0.133523  | 2.943490  |
| H  | -0.294321 | 0.463584  | 3.979445  |
| H  | -0.183131 | 0.969963  | 2.292852  |
| H  | 0.625111  | -1.870110 | -3.264674 |
| H  | -1.531639 | -0.962411 | 0.858639  |
| H  | -1.494973 | -0.077880 | 2.804168  |
| Cl | -0.851359 | -2.589747 | -1.153667 |

31-TS

|                              |                     |
|------------------------------|---------------------|
| B3LYP SCF energy:            | -3065.19384922 a.u. |
| B3LYP enthalpy:              | -3064.310204 a.u.   |
| B3LYP free energy:           | -3064.461780 a.u.   |
| M06 SCF energy in solution:  | -3065.39214244 a.u. |
| M06 enthalpy in solution:    | -3064.508497 a.u.   |
| M06 free energy in solution: | -3064.660073 a.u.   |

Three lowest frequencies (cm-1):      -287.3841      14.2697      21.6609  
Imaginary frequency:                      -287.3841 cm-1

Cartesian coordinates

| ATOM | X         | Y         | Z         |
|------|-----------|-----------|-----------|
| C    | -2.735949 | -2.317201 | 1.424843  |
| C    | -2.820539 | -4.838144 | 0.221625  |
| C    | -2.209495 | -2.469900 | 0.106505  |
| C    | -3.295877 | -3.399258 | 2.109814  |
| C    | -3.338928 | -4.657862 | 1.507479  |
| C    | -2.263937 | -3.760826 | -0.463740 |
| H    | -3.665876 | -3.277942 | 3.124229  |
| H    | -3.774683 | -5.496504 | 2.043795  |
| H    | -1.889322 | -3.888948 | -1.472707 |
| H    | -2.857030 | -5.817737 | -0.247132 |
| C    | -2.616394 | -0.986000 | 2.026985  |
| C    | -2.333095 | 1.597009  | 2.944539  |
| C    | -3.468945 | -0.508118 | 3.029281  |
| N    | -1.628513 | -0.200883 | 1.513913  |
| C    | -1.510640 | 1.061969  | 1.958311  |
| C    | -3.327603 | 0.792406  | 3.497712  |
| H    | -4.258960 | -1.148105 | 3.404929  |
| H    | -0.732249 | 1.660020  | 1.504442  |
| H    | -3.993587 | 1.176570  | 4.264616  |
| H    | -2.192108 | 2.626245  | 3.255515  |
| Rh   | -0.498008 | -1.137526 | -0.044804 |
| C    | -3.165991 | -1.331987 | -1.242752 |
| O    | -3.750762 | -0.458779 | -0.592864 |
| O    | -3.023522 | -1.768978 | -2.336578 |
| Al   | -4.984381 | 1.015261  | -1.180244 |
| C    | -6.442501 | 0.791939  | 0.151235  |
| H    | -6.081830 | 0.826660  | 1.188982  |
| H    | -7.218521 | 1.565136  | 0.059668  |
| H    | -6.950044 | -0.174833 | 0.024482  |
| C    | -5.297422 | 0.637767  | -3.096015 |
| H    | -5.734890 | -0.353524 | -3.274729 |
| H    | -5.998326 | 1.374190  | -3.515949 |
| H    | -4.381477 | 0.694262  | -3.698362 |
| O    | -3.942122 | 2.413829  | -0.911705 |
| C    | -4.110009 | 3.429968  | 0.031422  |
| H    | -3.188616 | 3.581454  | 0.619212  |
| H    | -4.343220 | 4.393117  | -0.456153 |
| H    | -4.922481 | 3.230930  | 0.750893  |
| P    | 1.712031  | 0.278513  | 0.022930  |
| C    | 1.046803  | 2.034480  | -0.075132 |

|   |           |           |           |
|---|-----------|-----------|-----------|
| C | -0.022023 | 2.226533  | -1.001091 |
| C | -0.645217 | 3.469603  | -1.113110 |
| H | -1.476615 | 3.567570  | -1.805402 |
| C | -0.263383 | 4.561790  | -0.332118 |
| C | 0.754248  | 4.356758  | 0.595304  |
| H | 1.052698  | 5.184857  | 1.234226  |
| C | 1.415264  | 3.127353  | 0.760275  |
| C | -0.585896 | 1.127202  | -1.875852 |
| H | 0.148519  | 0.430065  | -2.281603 |
| H | -1.353985 | 0.563341  | -1.319545 |
| H | -1.140462 | 1.552329  | -2.717686 |
| C | -0.939673 | 5.902057  | -0.484187 |
| H | -0.622541 | 6.603513  | 0.294104  |
| H | -0.704349 | 6.353305  | -1.456486 |
| H | -2.029756 | 5.801462  | -0.433168 |
| C | 2.455175  | 3.111204  | 1.865096  |
| H | 2.289053  | 2.316037  | 2.594618  |
| H | 3.472853  | 2.987531  | 1.488080  |
| H | 2.423869  | 4.064037  | 2.401724  |
| C | 2.749274  | -0.147991 | -1.478820 |
| C | 2.992797  | 0.681625  | -2.608551 |
| C | 3.742406  | 0.168842  | -3.676510 |
| H | 3.922526  | 0.816478  | -4.531850 |
| C | 4.279013  | -1.116462 | -3.683749 |
| C | 4.065764  | -1.899344 | -2.552665 |
| H | 4.484502  | -2.902689 | -2.514172 |
| C | 3.313968  | -1.455677 | -1.460540 |
| C | 2.573315  | 2.130656  | -2.775750 |
| H | 1.523247  | 2.235225  | -3.063590 |
| H | 2.714225  | 2.730888  | -1.875297 |
| H | 3.168786  | 2.587002  | -3.572106 |
| C | 5.046623  | -1.642175 | -4.872175 |
| H | 4.379949  | -2.174267 | -5.563708 |
| H | 5.520915  | -0.831544 | -5.435802 |
| H | 5.826249  | -2.348385 | -4.566333 |
| C | 3.218637  | -2.425924 | -0.299767 |
| H | 3.298441  | -3.450556 | -0.673356 |
| H | 4.031575  | -2.263164 | 0.418297  |
| C | 3.004150  | 0.156715  | 1.395983  |
| C | 4.358932  | 0.536248  | 1.171367  |
| C | 5.326127  | 0.246167  | 2.142355  |
| H | 6.353243  | 0.548274  | 1.947647  |
| C | 5.026487  | -0.389431 | 3.344939  |
| C | 3.686795  | -0.686768 | 3.584679  |
| H | 3.406437  | -1.134812 | 4.535342  |

|    |          |           |           |
|----|----------|-----------|-----------|
| C  | 2.676622 | -0.425482 | 2.651013  |
| C  | 4.880723 | 1.302987  | -0.028678 |
| H  | 5.223168 | 0.636087  | -0.825678 |
| H  | 4.139999 | 1.973523  | -0.463232 |
| H  | 5.736397 | 1.913063  | 0.281061  |
| C  | 6.102115 | -0.729679 | 4.347289  |
| H  | 6.498594 | -1.738420 | 4.170368  |
| H  | 6.945229 | -0.033736 | 4.283213  |
| H  | 5.717384 | -0.707879 | 5.372461  |
| C  | 1.272817 | -0.759913 | 3.093260  |
| H  | 1.271062 | -1.048364 | 4.148791  |
| H  | 0.594512 | 0.089377  | 2.984046  |
| H  | 0.840502 | -1.585426 | 2.520818  |
| H  | 0.017839 | -2.213155 | 0.885817  |
| H  | 2.273340 | -2.359671 | 0.238511  |
| Cl | 0.313309 | -2.377735 | -1.892313 |

### 32-TS

|                                  |                     |         |         |
|----------------------------------|---------------------|---------|---------|
| B3LYP SCF energy:                | -2207.38516030 a.u. |         |         |
| B3LYP enthalpy:                  | -2206.590746 a.u.   |         |         |
| B3LYP free energy:               | -2206.719186 a.u.   |         |         |
| M06 SCF energy in solution:      | -2207.62293486 a.u. |         |         |
| M06 enthalpy in solution:        | -2206.828521 a.u.   |         |         |
| M06 free energy in solution:     | -2206.956961 a.u.   |         |         |
| Three lowest frequencies (cm-1): | -325.8136           | 16.7336 | 21.4164 |
| Imaginary frequency:             | -325.8136 cm-1      |         |         |

### Cartesian coordinates

| ATOM | X         | Y         | Z         |
|------|-----------|-----------|-----------|
| C    | -4.190515 | -0.162464 | -0.125355 |
| C    | -5.068848 | -2.542017 | -1.317214 |
| C    | -3.425797 | -0.728657 | -1.183626 |
| C    | -5.347942 | -0.799234 | 0.338410  |
| C    | -5.787668 | -1.981490 | -0.257813 |
| C    | -3.900266 | -1.925858 | -1.757772 |
| H    | -5.898327 | -0.395022 | 1.183774  |
| H    | -6.688505 | -2.466645 | 0.108961  |
| H    | -3.343887 | -2.375761 | -2.574888 |
| H    | -5.415097 | -3.459782 | -1.785762 |
| C    | -3.730303 | 1.112255  | 0.461393  |
| C    | -2.763373 | 3.487529  | 1.471737  |
| C    | -4.606295 | 2.006526  | 1.095753  |
| N    | -2.410708 | 1.398372  | 0.325575  |

|    |           |           |           |
|----|-----------|-----------|-----------|
| C  | -1.955659 | 2.558666  | 0.819004  |
| C  | -4.120024 | 3.202638  | 1.610759  |
| H  | -5.663039 | 1.772315  | 1.154627  |
| H  | -0.898408 | 2.749918  | 0.688819  |
| H  | -4.791216 | 3.903859  | 2.099027  |
| H  | -2.330884 | 4.408738  | 1.848462  |
| Rh | -1.277791 | -0.430427 | -0.688850 |
| C  | -2.977840 | 0.525644  | -2.575674 |
| O  | -4.014927 | 0.961714  | -2.994912 |
| O  | -1.761108 | 0.616962  | -2.744817 |
| P  | 1.061749  | -0.219596 | 0.039104  |
| C  | 1.475426  | 1.494858  | 0.781549  |
| C  | 1.317279  | 2.578245  | -0.146696 |
| C  | 1.585833  | 3.890462  | 0.253927  |
| H  | 1.456230  | 4.685349  | -0.477368 |
| C  | 2.002181  | 4.217834  | 1.544942  |
| C  | 2.157209  | 3.164539  | 2.433882  |
| H  | 2.493295  | 3.375125  | 3.447863  |
| C  | 1.923444  | 1.819843  | 2.091325  |
| C  | 0.867705  | 2.426049  | -1.584832 |
| H  | 1.649723  | 1.975735  | -2.203214 |
| H  | -0.030484 | 1.814605  | -1.697262 |
| H  | 0.643572  | 3.409660  | -2.008243 |
| C  | 2.289175  | 5.646457  | 1.939777  |
| H  | 2.456906  | 5.738314  | 3.017603  |
| H  | 3.184261  | 6.026096  | 1.430286  |
| H  | 1.461042  | 6.311958  | 1.667931  |
| C  | 2.239764  | 0.871697  | 3.236305  |
| H  | 1.544036  | 1.035492  | 4.067065  |
| H  | 2.206659  | -0.179915 | 2.980519  |
| H  | 3.243688  | 1.089229  | 3.618593  |
| C  | 2.584770  | -0.312055 | -1.111324 |
| C  | 3.902949  | -0.186505 | -0.571945 |
| C  | 5.008345  | -0.148144 | -1.426111 |
| H  | 5.997536  | -0.059529 | -0.980974 |
| C  | 4.894145  | -0.222111 | -2.814326 |
| C  | 3.612663  | -0.360936 | -3.328675 |
| H  | 3.480455  | -0.435365 | -4.406010 |
| C  | 2.461954  | -0.415097 | -2.522706 |
| C  | 4.241612  | -0.116459 | 0.900531  |
| H  | 4.149126  | 0.904602  | 1.281592  |
| H  | 3.609101  | -0.759469 | 1.511801  |
| H  | 5.278375  | -0.431120 | 1.056256  |
| C  | 6.109373  | -0.148954 | -3.706646 |
| H  | 5.860572  | -0.398946 | -4.742788 |

|   |           |           |           |
|---|-----------|-----------|-----------|
| H | 6.543824  | 0.859248  | -3.703055 |
| H | 6.894165  | -0.837183 | -3.370660 |
| C | 1.179805  | -0.617829 | -3.296763 |
| H | 1.248686  | -0.116637 | -4.267920 |
| H | 0.290118  | -0.251657 | -2.797727 |
| C | 1.190300  | -1.633885 | 1.294595  |
| C | 1.898796  | -2.843761 | 1.037406  |
| C | 1.834245  | -3.886538 | 1.975579  |
| H | 2.385431  | -4.799083 | 1.759829  |
| C | 1.096611  | -3.813114 | 3.152277  |
| C | 0.366225  | -2.646271 | 3.363624  |
| H | -0.253836 | -2.560591 | 4.254474  |
| C | 0.375028  | -1.576872 | 2.463638  |
| C | 2.732332  | -3.168405 | -0.190687 |
| H | 2.266255  | -2.856211 | -1.124664 |
| H | 3.723195  | -2.705648 | -0.160291 |
| H | 2.879297  | -4.251359 | -0.244119 |
| C | 1.085894  | -4.943166 | 4.153014  |
| H | 1.388480  | -5.888928 | 3.691748  |
| H | 1.778921  | -4.746216 | 4.982148  |
| H | 0.090805  | -5.081347 | 4.590573  |
| C | -0.552781 | -0.436640 | 2.843276  |
| H | -0.470917 | -0.231383 | 3.916597  |
| H | -0.373054 | 0.492479  | 2.307419  |
| H | 1.021346  | -1.684510 | -3.496224 |
| C | -0.841987 | -2.295966 | -1.489168 |
| H | -1.470095 | -3.045917 | -1.000313 |
| H | 0.198451  | -2.608256 | -1.382043 |
| H | -1.087567 | -2.255433 | -2.556414 |
| H | -1.442226 | -1.249987 | 0.591413  |
| H | -1.591035 | -0.720571 | 2.640807  |

### 33-TS

|                                  |                     |         |         |
|----------------------------------|---------------------|---------|---------|
| B3LYP SCF energy:                | -2644.86460093 a.u. |         |         |
| B3LYP enthalpy:                  | -2643.944702 a.u.   |         |         |
| B3LYP free energy:               | -2644.097087 a.u.   |         |         |
| M06 SCF energy in solution:      | -2645.02669494 a.u. |         |         |
| M06 enthalpy in solution:        | -2644.106796 a.u.   |         |         |
| M06 free energy in solution:     | -2644.259181 a.u.   |         |         |
| Three lowest frequencies (cm-1): | -262.4232           | 15.1376 | 22.6398 |
| Imaginary frequency:             | -262.4232 cm-1      |         |         |

Cartesian coordinates

| ATOM | X         | Y         | Z         |
|------|-----------|-----------|-----------|
| C    | 2.678813  | -2.606487 | -0.845080 |
| C    | 2.666041  | -4.855705 | 0.819371  |
| C    | 2.063318  | -2.502998 | 0.438365  |
| C    | 3.256851  | -3.809623 | -1.273169 |
| C    | 3.248298  | -4.933183 | -0.448471 |
| C    | 2.093242  | -3.660186 | 1.246561  |
| H    | 3.687920  | -3.884617 | -2.267742 |
| H    | 3.696231  | -5.861405 | -0.793001 |
| H    | 1.678328  | -3.606700 | 2.247435  |
| H    | 2.663740  | -5.724074 | 1.473295  |
| C    | 2.661095  | -1.424970 | -1.724364 |
| C    | 2.534055  | 0.855310  | -3.269262 |
| C    | 3.614170  | -1.213769 | -2.732790 |
| N    | 1.675177  | -0.523776 | -1.491829 |
| C    | 1.628912  | 0.584734  | -2.245970 |
| C    | 3.550030  | -0.066971 | -3.515102 |
| H    | 4.414410  | -1.930761 | -2.876009 |
| H    | 0.832619  | 1.282116  | -2.017162 |
| H    | 4.288181  | 0.109982  | -4.292285 |
| H    | 2.442985  | 1.771443  | -3.843213 |
| Rh   | 0.397157  | -1.121594 | 0.387058  |
| C    | 3.110605  | -1.082175 | 1.638507  |
| O    | 3.661928  | -0.339531 | 0.836772  |
| O    | 2.986962  | -1.389139 | 2.775525  |
| Al   | 4.967693  | 1.201704  | 1.167049  |
| C    | 6.479200  | 0.602857  | 0.029984  |
| H    | 6.171294  | 0.394575  | -1.004004 |
| H    | 7.284069  | 1.349770  | -0.021881 |
| H    | 6.933184  | -0.319278 | 0.418839  |
| C    | 5.101009  | 1.226105  | 3.139429  |
| H    | 5.474596  | 0.285191  | 3.564052  |
| H    | 5.798605  | 2.015684  | 3.454938  |
| H    | 4.142795  | 1.440623  | 3.630900  |
| O    | 4.034887  | 2.553208  | 0.534900  |
| C    | 4.262073  | 3.257518  | -0.652376 |
| H    | 3.405320  | 3.167560  | -1.340694 |
| H    | 4.405954  | 4.332398  | -0.447876 |
| H    | 5.154461  | 2.912404  | -1.200655 |
| P    | -1.735808 | 0.225624  | -0.039416 |
| C    | -1.054358 | 1.925773  | -0.473662 |
| C    | 0.045470  | 2.359832  | 0.324041  |
| C    | 0.688332  | 3.567556  | 0.049534  |
| H    | 1.539843  | 3.847167  | 0.664021  |
| C    | 0.297684  | 4.387720  | -1.010712 |

|   |           |           |           |
|---|-----------|-----------|-----------|
| C | -0.757048 | 3.944113  | -1.803343 |
| H | -1.069705 | 4.555749  | -2.646708 |
| C | -1.443339 | 2.738413  | -1.574816 |
| C | 0.615466  | 1.561506  | 1.478184  |
| H | -0.132665 | 1.110753  | 2.131917  |
| H | 1.295229  | 0.777672  | 1.101863  |
| H | 1.264098  | 2.192099  | 2.092812  |
| C | 0.996263  | 5.697967  | -1.280546 |
| H | 0.704912  | 6.117268  | -2.248939 |
| H | 0.751868  | 6.440360  | -0.509777 |
| H | 2.084978  | 5.574297  | -1.271905 |
| C | -2.540516 | 2.431857  | -2.576418 |
| H | -2.384746 | 1.485164  | -3.098681 |
| H | -3.530313 | 2.382090  | -2.118056 |
| H | -2.571913 | 3.223819  | -3.330513 |
| C | -2.775597 | 0.304249  | 1.527085  |
| C | -2.982500 | 1.444311  | 2.353214  |
| C | -3.679011 | 1.294694  | 3.561758  |
| H | -3.826404 | 2.178342  | 4.178987  |
| C | -4.204958 | 0.079812  | 3.993606  |
| C | -4.040697 | -1.016052 | 3.149567  |
| H | -4.462409 | -1.976413 | 3.438940  |
| C | -3.343834 | -0.937813 | 1.938949  |
| C | -2.579648 | 2.871989  | 2.031615  |
| H | -1.519686 | 3.067003  | 2.217029  |
| H | -2.771679 | 3.148901  | 0.993313  |
| H | -3.147891 | 3.557404  | 2.667663  |
| C | -4.914125 | -0.046679 | 5.320104  |
| H | -4.214801 | -0.344684 | 6.112662  |
| H | -5.366941 | 0.902439  | 5.626030  |
| H | -5.703198 | -0.805538 | 5.282545  |
| C | -3.297477 | -2.217560 | 1.126877  |
| H | -3.454864 | -3.078313 | 1.784061  |
| H | -4.087046 | -2.231299 | 0.366958  |
| C | -3.025717 | -0.289311 | -1.314982 |
| C | -4.398372 | 0.072040  | -1.195719 |
| C | -5.342895 | -0.520414 | -2.044792 |
| H | -6.385647 | -0.229824 | -1.932767 |
| C | -5.002393 | -1.443121 | -3.030906 |
| C | -3.646239 | -1.716953 | -3.198219 |
| H | -3.335321 | -2.382003 | -4.000827 |
| C | -2.657317 | -1.158076 | -2.380183 |
| C | -4.967731 | 1.116780  | -0.253211 |
| H | -5.288633 | 0.686736  | 0.700671  |
| H | -4.263416 | 1.916669  | -0.026309 |



|   |           |           |           |
|---|-----------|-----------|-----------|
| H | -5.847414 | 1.574763  | -0.718782 |
| C | -6.051841 | -2.102951 | -3.891609 |
| H | -6.345125 | -3.076362 | -3.476205 |
| H | -6.957930 | -1.491848 | -3.960050 |
| H | -5.683247 | -2.283141 | -4.907285 |
| C | -1.230063 | -1.478584 | -2.751226 |
| H | -1.205296 | -2.115243 | -3.641022 |
| H | -0.661525 | -0.571885 | -2.980989 |
| H | -0.689846 | -1.989044 | -1.950439 |
| H | -0.216365 | -2.437083 | -0.073014 |
| H | -2.346141 | -2.364785 | 0.613384  |
| C | -0.214945 | -1.742907 | 2.263931  |
| H | -0.956906 | -1.068412 | 2.693534  |
| H | 0.684156  | -1.727145 | 2.885867  |
| H | -0.625946 | -2.757131 | 2.259746  |

AlMe2OMe

|                                  |                    |         |         |
|----------------------------------|--------------------|---------|---------|
| B3LYP SCF energy:                | -437.44603306 a.u. |         |         |
| B3LYP enthalpy:                  | -437.321683 a.u.   |         |         |
| B3LYP free energy:               | -437.368257 a.u.   |         |         |
| M06 SCF energy in solution:      | -437.36244064 a.u. |         |         |
| M06 enthalpy in solution:        | -437.238091 a.u.   |         |         |
| M06 free energy in solution:     | -437.284665 a.u.   |         |         |
| Three lowest frequencies (cm-1): | 20.6910            | 26.5099 | 93.0634 |

Cartesian coordinates

| ATOM | X         | Y         | Z         |
|------|-----------|-----------|-----------|
| Al   | -0.478861 | -0.022717 | -0.002623 |
| C    | -2.017675 | 1.195028  | 0.001685  |
| H    | -2.510096 | 1.207846  | 0.983757  |
| H    | -1.718605 | 2.224149  | -0.226590 |
| H    | -2.782478 | 0.895638  | -0.726571 |
| C    | -0.620699 | -1.987454 | 0.001938  |
| H    | -1.013208 | -2.351882 | -0.957551 |
| H    | 0.334473  | -2.496538 | 0.175901  |
| H    | -1.323262 | -2.329722 | 0.773465  |
| O    | 1.060970  | 0.738323  | -0.008695 |
| C    | 2.383322  | 0.262105  | 0.005382  |
| H    | 2.444976  | -0.837088 | 0.023236  |
| H    | 2.922261  | 0.614678  | -0.884962 |
| H    | 2.913672  | 0.643580  | 0.888948  |

## CH4

|                                  |                   |           |           |
|----------------------------------|-------------------|-----------|-----------|
| B3LYP SCF energy:                | -40.51766309 a.u. |           |           |
| B3LYP enthalpy:                  | -40.468641 a.u.   |           |           |
| B3LYP free energy:               | -40.489773 a.u.   |           |           |
| M06 SCF energy in solution:      | -40.48728895 a.u. |           |           |
| M06 enthalpy in solution:        | -40.438267 a.u.   |           |           |
| M06 free energy in solution:     | -40.459399 a.u.   |           |           |
| Three lowest frequencies (cm-1): | 1374.3645         | 1374.3645 | 1374.3645 |

## Cartesian coordinates

| ATOM | X         | Y         | Z         |
|------|-----------|-----------|-----------|
| C    | 0.000000  | 0.000000  | 0.000000  |
| H    | 0.631397  | 0.631397  | 0.631397  |
| H    | -0.631397 | -0.631397 | 0.631397  |
| H    | -0.631397 | 0.631397  | -0.631397 |
| H    | 0.631397  | -0.631397 | -0.631397 |

## CO2

|                                  |                    |          |           |
|----------------------------------|--------------------|----------|-----------|
| B3LYP SCF energy:                | -188.57757052 a.u. |          |           |
| B3LYP enthalpy:                  | -188.562367 a.u.   |          |           |
| B3LYP free energy:               | -188.586668 a.u.   |          |           |
| M06 SCF energy in solution:      | -188.56077334 a.u. |          |           |
| M06 enthalpy in solution:        | -188.545570 a.u.   |          |           |
| M06 free energy in solution:     | -188.569871 a.u.   |          |           |
| Three lowest frequencies (cm-1): | 646.8590           | 646.8590 | 1370.4469 |

## Cartesian coordinates

| ATOM | X        | Y        | Z         |
|------|----------|----------|-----------|
| C    | 0.000000 | 0.000000 | 0.000000  |
| O    | 0.000000 | 0.000000 | 1.169583  |
| O    | 0.000000 | 0.000000 | -1.169583 |

## ZnMe2

|                                  |                    |          |          |
|----------------------------------|--------------------|----------|----------|
| B3LYP SCF energy:                | -145.39018196 a.u. |          |          |
| B3LYP enthalpy:                  | -145.312715 a.u.   |          |          |
| B3LYP free energy:               | -145.347651 a.u.   |          |          |
| M06 SCF energy in solution:      | -306.96894673 a.u. |          |          |
| M06 enthalpy in solution:        | -306.891480 a.u.   |          |          |
| M06 free energy in solution:     | -306.926416 a.u.   |          |          |
| Three lowest frequencies (cm-1): | 45.2006            | 111.0916 | 111.0927 |

Cartesian coordinates

| ATOM | X         | Y         | Z         |
|------|-----------|-----------|-----------|
| Zn   | 0.000000  | 0.000000  | 0.000000  |
| C    | 0.000000  | 0.000000  | -2.023610 |
| H    | -0.511076 | -0.885394 | -2.421634 |
| H    | -0.511236 | 0.885301  | -2.421634 |
| H    | 1.022311  | 0.000092  | -2.421634 |
| C    | 0.000000  | 0.000000  | 2.023610  |
| H    | 0.511236  | 0.885301  | 2.421634  |
| H    | -1.022311 | 0.000092  | 2.421634  |
| H    | 0.511076  | -0.885394 | 2.421634  |

RhCl-dimer

|                                  |                     |         |         |
|----------------------------------|---------------------|---------|---------|
| B3LYP SCF energy:                | -3919.73121860 a.u. |         |         |
| B3LYP enthalpy:                  | -3918.604755 a.u.   |         |         |
| B3LYP free energy:               | -3918.783927 a.u.   |         |         |
| M06 SCF energy in solution:      | -3920.76582740 a.u. |         |         |
| M06 enthalpy in solution:        | -3919.639364 a.u.   |         |         |
| M06 free energy in solution:     | -3919.818536 a.u.   |         |         |
| Three lowest frequencies (cm-1): | 7.1346              | 12.5002 | 18.6486 |

Cartesian coordinates

| ATOM | X        | Y         | Z         |
|------|----------|-----------|-----------|
| Rh   | 1.702905 | 0.580822  | -0.418190 |
| P    | 3.852557 | -0.125862 | -0.014394 |
| C    | 4.201701 | 0.044800  | 1.834694  |
| C    | 3.253154 | -0.560698 | 2.710347  |
| C    | 3.339554 | -0.351088 | 4.090167  |
| H    | 2.605624 | -0.836047 | 4.730541  |
| C    | 4.322884 | 0.450224  | 4.666404  |
| C    | 5.267978 | 1.004249  | 3.808122  |
| H    | 6.074116 | 1.599538  | 4.231628  |
| C    | 5.247992 | 0.817372  | 2.417105  |
| C    | 2.127124 | -1.454139 | 2.246125  |
| H    | 1.736644 | -2.033079 | 3.089931  |
| H    | 2.420881 | -2.159976 | 1.465422  |
| H    | 1.304650 | -0.863712 | 1.829038  |
| C    | 4.361747 | 0.703701  | 6.153922  |
| H    | 4.021167 | -0.171222 | 6.718718  |
| H    | 3.706325 | 1.541090  | 6.428944  |
| H    | 5.372215 | 0.956295  | 6.492536  |
| C    | 6.419293 | 1.444768  | 1.684616  |

|    |           |           |           |
|----|-----------|-----------|-----------|
| H  | 6.132575  | 2.302717  | 1.071147  |
| H  | 6.929694  | 0.735469  | 1.030129  |
| H  | 7.154219  | 1.794837  | 2.415841  |
| C  | 4.303006  | -1.813293 | -0.661090 |
| C  | 4.916359  | -2.848964 | 0.094292  |
| C  | 5.065511  | -4.116699 | -0.484662 |
| H  | 5.535820  | -4.899446 | 0.107003  |
| C  | 4.651720  | -4.409264 | -1.782333 |
| C  | 4.109257  | -3.365954 | -2.531237 |
| H  | 3.813843  | -3.550180 | -3.561840 |
| C  | 3.929198  | -2.079745 | -2.011846 |
| C  | 5.494208  | -2.697761 | 1.488209  |
| H  | 4.725129  | -2.659347 | 2.265129  |
| H  | 6.095735  | -1.792272 | 1.599508  |
| H  | 6.139420  | -3.553993 | 1.708388  |
| C  | 4.785845  | -5.799195 | -2.356058 |
| H  | 5.001978  | -5.771522 | -3.429770 |
| H  | 3.855488  | -6.368615 | -2.227967 |
| H  | 5.584069  | -6.363035 | -1.861484 |
| C  | 3.408042  | -1.029861 | -2.969354 |
| H  | 3.076978  | -1.501061 | -3.899606 |
| H  | 4.186405  | -0.299441 | -3.222653 |
| H  | 2.563863  | -0.468076 | -2.551115 |
| C  | 4.919927  | 1.130194  | -0.899872 |
| C  | 6.190510  | 0.904489  | -1.484420 |
| C  | 6.848575  | 1.976004  | -2.105589 |
| H  | 7.822784  | 1.791441  | -2.553972 |
| C  | 6.317246  | 3.264737  | -2.158004 |
| C  | 5.066515  | 3.472403  | -1.571822 |
| H  | 4.619859  | 4.464462  | -1.598878 |
| C  | 4.359083  | 2.430050  | -0.969944 |
| C  | 6.922918  | -0.421703 | -1.478624 |
| H  | 6.488567  | -1.134275 | -2.187261 |
| H  | 6.909362  | -0.908836 | -0.500593 |
| H  | 7.969452  | -0.268242 | -1.760295 |
| C  | 7.051692  | 4.387875  | -2.850274 |
| H  | 8.133050  | 4.215418  | -2.857950 |
| H  | 6.863064  | 5.350650  | -2.362884 |
| H  | 6.729135  | 4.485105  | -3.895593 |
| C  | 2.971045  | 2.716604  | -0.451077 |
| H  | 2.815578  | 2.440091  | 0.603055  |
| H  | 2.231343  | 2.223557  | -1.157961 |
| H  | 2.698634  | 3.772890  | -0.536047 |
| Cl | 0.571900  | -1.544044 | -0.772139 |
| Rh | -1.702836 | -0.581149 | -0.417518 |

|   |           |           |           |
|---|-----------|-----------|-----------|
| P | -3.852526 | 0.125814  | -0.014517 |
| C | -4.201825 | -0.043147 | 1.834699  |
| C | -3.253356 | 0.563184  | 2.709901  |
| C | -3.339932 | 0.354925  | 4.089896  |
| H | -2.606056 | 0.840468  | 4.729891  |
| C | -4.323378 | -0.445807 | 4.666793  |
| C | -5.268323 | -1.000684 | 3.808933  |
| H | -6.074480 | -1.595608 | 4.232910  |
| C | -5.248158 | -0.815169 | 2.417716  |
| C | -2.127213 | 1.456093  | 2.244919  |
| H | -1.736642 | 2.035705  | 3.088222  |
| H | -2.420896 | 2.161299  | 1.463615  |
| H | -1.304817 | 0.865218  | 1.828313  |
| C | -4.362435 | -0.697695 | 6.154576  |
| H | -4.025662 | 0.179202  | 6.718616  |
| H | -3.703969 | -1.532189 | 6.431109  |
| H | -5.372190 | -0.953751 | 6.492685  |
| C | -6.419297 | -1.443421 | 1.685693  |
| H | -6.132370 | -2.301829 | 1.072970  |
| H | -6.929806 | -0.734780 | 1.030573  |
| H | -7.154197 | -1.793015 | 2.417171  |
| C | -4.302959 | 1.812637  | -0.662789 |
| C | -4.916405 | 2.849004  | 0.091573  |
| C | -5.065615 | 4.116166  | -0.488609 |
| H | -5.536001 | 4.899456  | 0.102277  |
| C | -4.651790 | 4.407502  | -1.786552 |
| C | -4.109212 | 3.363513  | -2.534418 |
| H | -3.813720 | 3.546779  | -3.565169 |
| C | -3.929088 | 2.077815  | -2.013772 |
| C | -5.494262 | 2.699107  | 1.485627  |
| H | -4.725186 | 2.661291  | 2.262578  |
| H | -6.095892 | 1.793783  | 1.597740  |
| H | -6.139375 | 3.555606  | 1.705058  |
| C | -4.785972 | 5.796884  | -2.361594 |
| H | -5.001154 | 5.768200  | -3.435467 |
| H | -3.855962 | 6.366795  | -2.233164 |
| H | -5.584855 | 6.360829  | -1.868198 |
| C | -3.407807 | 1.027045  | -2.970240 |
| H | -3.076207 | 1.497415  | -3.900716 |
| H | -4.186309 | 0.296671  | -3.223279 |
| H | -2.563969 | 0.465326  | -2.551220 |
| C | -4.919806 | -1.131045 | -0.898943 |
| C | -6.190363 | -0.905893 | -1.483769 |
| C | -6.848344 | -1.977980 | -2.104029 |
| H | -7.822524 | -1.793857 | -2.552657 |

|    |           |           |           |
|----|-----------|-----------|-----------|
| C  | -6.316969 | -3.266745 | -2.155262 |
| C  | -5.066273 | -3.473858 | -1.568815 |
| H  | -4.619575 | -4.465922 | -1.594970 |
| C  | -4.358913 | -2.430942 | -0.967826 |
| C  | -6.922813 | 0.420276  | -1.479185 |
| H  | -6.488412 | 1.132264  | -2.188377 |
| H  | -6.909383 | 0.908229  | -0.501560 |
| H  | -7.969310 | 0.266536  | -1.760839 |
| C  | -7.051337 | -4.390511 | -2.846598 |
| H  | -8.132716 | -4.218190 | -2.854320 |
| H  | -6.862553 | -5.352881 | -2.358473 |
| H  | -6.728857 | -4.488521 | -3.891868 |
| C  | -2.970900 | -2.716958 | -0.448597 |
| H  | -2.815603 | -2.439697 | 0.605356  |
| H  | -2.231217 | -2.224293 | -1.155825 |
| H  | -2.698318 | -3.773259 | -0.532846 |
| Cl | -0.571847 | 1.543489  | -0.773355 |

Pmes3

|                                  |                                   |
|----------------------------------|-----------------------------------|
| B3LYP SCF energy:                | -1390.10109545 a.u.               |
| B3LYP enthalpy:                  | -1389.544504 a.u.                 |
| B3LYP free energy:               | -1389.638655 a.u.                 |
| M06 SCF energy in solution:      | -1389.55316132 a.u.               |
| M06 enthalpy in solution:        | -1388.996570 a.u.                 |
| M06 free energy in solution:     | -1389.090721 a.u.                 |
| Three lowest frequencies (cm-1): | 24.9750      29.6262      31.6548 |

Cartesian coordinates

| ATOM | X         | Y         | Z         |
|------|-----------|-----------|-----------|
| P    | -0.002244 | 0.000378  | 0.802392  |
| C    | 0.918744  | 1.498329  | 0.204579  |
| C    | 2.084314  | 1.801560  | 0.966915  |
| C    | 2.805274  | 2.968994  | 0.703833  |
| H    | 3.696762  | 3.174839  | 1.293769  |
| C    | 2.410880  | 3.879961  | -0.278773 |
| C    | 1.266341  | 3.576038  | -1.013761 |
| H    | 0.944643  | 4.264247  | -1.792981 |
| C    | 0.517134  | 2.408258  | -0.806827 |
| C    | 2.598346  | 0.889275  | 2.061418  |
| H    | 2.884801  | -0.096245 | 1.675463  |
| H    | 1.837020  | 0.713941  | 2.830133  |
| H    | 3.479340  | 1.326769  | 2.541720  |
| C    | 3.212424  | 5.131941  | -0.547735 |

|   |           |           |           |
|---|-----------|-----------|-----------|
| H | 2.665794  | 5.825362  | -1.194435 |
| H | 4.165029  | 4.898891  | -1.042537 |
| H | 3.457102  | 5.658508  | 0.382702  |
| C | -0.670407 | 2.197176  | -1.721519 |
| H | -1.626668 | 2.347459  | -1.210027 |
| H | -0.695296 | 1.186516  | -2.138177 |
| H | -0.626877 | 2.902227  | -2.557959 |
| C | 0.834983  | -1.544308 | 0.200262  |
| C | 1.821270  | -1.647960 | -0.814957 |
| C | 2.458505  | -2.878705 | -1.027359 |
| H | 3.208646  | -2.942324 | -1.813452 |
| C | 2.156738  | -4.023199 | -0.290665 |
| C | 1.169706  | -3.914557 | 0.690641  |
| H | 0.900850  | -4.793241 | 1.273947  |
| C | 0.517655  | -2.707712 | 0.959106  |
| C | 2.223543  | -0.512980 | -1.732542 |
| H | 2.835229  | 0.240013  | -1.225017 |
| H | 1.357294  | 0.013669  | -2.142120 |
| H | 2.806417  | -0.902531 | -2.573442 |
| C | 2.880784  | -5.326588 | -0.532000 |
| H | 2.215712  | -6.186765 | -0.395994 |
| H | 3.718107  | -5.452242 | 0.167963  |
| H | 3.294310  | -5.373902 | -1.545054 |
| C | -0.531401 | -2.704629 | 2.051927  |
| H | -0.590682 | -3.688814 | 2.527422  |
| H | -1.528593 | -2.460875 | 1.666728  |
| H | -0.305252 | -1.960989 | 2.824836  |
| C | -1.759288 | 0.049470  | 0.202038  |
| C | -2.342440 | -0.749224 | -0.815800 |
| C | -3.728304 | -0.692666 | -1.021076 |
| H | -4.159474 | -1.313281 | -1.804475 |
| C | -4.568857 | 0.136156  | -0.279116 |
| C | -3.981758 | 0.929084  | 0.708746  |
| H | -4.610395 | 1.588441  | 1.304342  |
| C | -2.609063 | 0.896387  | 0.970342  |
| C | -1.560172 | -1.660819 | -1.737331 |
| H | -1.213091 | -2.569306 | -1.234276 |
| H | -0.671362 | -1.170958 | -2.144037 |
| H | -2.188321 | -1.967318 | -2.580029 |
| C | -6.052325 | 0.202370  | -0.557266 |
| H | -6.415066 | -0.722715 | -1.017613 |
| H | -6.293839 | 1.024385  | -1.245400 |
| H | -6.624675 | 0.372579  | 0.361038  |
| C | -2.081955 | 1.793103  | 2.071549  |
| H | -2.904923 | 2.329980  | 2.553970  |

|   |           |          |          |
|---|-----------|----------|----------|
| H | -1.374973 | 2.540396 | 1.691765 |
| H | -1.547927 | 1.219079 | 2.837576 |
